# Supplementary material
Source: PubMed Central journal article supplement (PMC2838923)
Supplement: NIHMS179953-supplement-1_si_001.pdf [file NIHMS179953-supplement-1_si_001.pdf]

## Supporting Information

# Probing Substituent Effects in Aryl-Aryl Interactions Using Stereoselective Diels-Alder Cycloadditions

Steven E. Wheeler,<sup>§</sup> Anne J. McNeil,<sup>‡,a</sup> Peter Müller,<sup>‡</sup> Timothy M. Swager,<sup>‡,b,\*</sup> and K. N. Houk<sup>§,c,\*</sup>

<sup>§</sup>*Department of Chemistry and Biochemistry  
University of California, Los Angeles, CA 90095*

<sup>‡</sup>*Department of Chemistry  
Massachusetts Institute of Technology, Cambridge, MA 02139*

| <b>Contents</b>                                                                 | <b>Page</b> |
|---------------------------------------------------------------------------------|-------------|
| Materials                                                                       | S3          |
| General Experimental                                                            | S3          |
| <br>                                                                            |             |
| General Procedure for the Diels–Alder Reaction                                  | S4          |
| <b>Table S1.</b> Product Ratios and Isolated Yields                             | S4          |
| <b>Figure S1.</b> <sup>1</sup> H NMR Spectra of Crude Reaction Mixtures         | S5          |
| Control Experiment #1: Retro-Diels-Alder Reaction of <b>2a</b>                  | S6          |
| <b>Figure S2.</b> <sup>1</sup> H NMR Spectra for Control Experiment #1          | S7          |
| Control Experiment #2: Retro-Diels-Alder Reaction of <b>2c</b>                  | S8          |
| <b>Figure S3.</b> <sup>1</sup> H NMR Spectra for Control Experiment #2          | S9          |
| <br>                                                                            |             |
| <u>Synthetic Procedures</u>                                                     |             |
| Synthesis of <b>1a</b>                                                          | S10         |
| Synthesis of <b>1b</b>                                                          | S11         |
| Synthesis of <b>1c</b>                                                          | S12         |
| Synthesis of <b>1d</b>                                                          | S13         |
| <br>                                                                            |             |
| <u>NMR Spectra</u>                                                              |             |
| <b>Figure S4.</b> <sup>1</sup> H and <sup>13</sup> C NMR Spectra of <b>S1</b> . | S15         |
| <b>Figure S5.</b> <sup>1</sup> H and <sup>13</sup> C NMR Spectra of <b>1a</b> . | S16         |
| <b>Figure S6.</b> <sup>1</sup> H and <sup>13</sup> C NMR Spectra of <b>2a</b> . | S17         |
| <b>Figure S7.</b> <sup>1</sup> H and <sup>13</sup> C NMR Spectra of <b>S2</b> . | S18         |
| <b>Figure S8.</b> <sup>1</sup> H and <sup>13</sup> C NMR Spectra of <b>1b</b> . | S19         |

<sup>a</sup> Current Address: Department of Chemistry, University of Michigan, Ann Arbor, MI 48109-1055

<sup>b</sup> E-mail: tswager@mit.edu

<sup>c</sup> E-mail: houk@chem.ucla.edu

|                                                                                  |     |
|----------------------------------------------------------------------------------|-----|
| <b>Figure S9.</b> $^1\text{H}$ and $^{13}\text{C}$ NMR Spectra of <b>2b/3b</b> . | S20 |
| <b>Figure S10.</b> $^1\text{H}$ and $^{13}\text{C}$ NMR Spectra of <b>S3</b> .   | S21 |
| <b>Figure S11.</b> $^1\text{H}$ and $^{13}\text{C}$ NMR Spectra of <b>1c</b> .   | S22 |
| <b>Figure S12.</b> $^1\text{H}$ and $^{13}\text{C}$ NMR Spectra of <b>2c</b> .   | S23 |
| <b>Figure S13.</b> $^1\text{H}$ and $^{13}\text{C}$ NMR Spectra of <b>S4</b> .   | S24 |
| <b>Figure S14.</b> $^1\text{H}$ and $^{13}\text{C}$ NMR Spectra of <b>S5</b> .   | S25 |
| <b>Figure S15.</b> $^1\text{H}$ and $^{13}\text{C}$ NMR Spectra of <b>1d</b> .   | S26 |
| <b>Figure S16.</b> $^1\text{H}$ and $^{13}\text{C}$ NMR Spectra of <b>2d</b> .   | S27 |

#### X-ray Crystal Structures

|                                                                                     |     |
|-------------------------------------------------------------------------------------|-----|
| <b>Figure S17.</b> Crystal Structure of <b>2a</b> .                                 | S28 |
| <b>Table S2.</b> Summary of Bond Distances and Angles for <b>2a</b> .               | S28 |
| <b>Figure S18.</b> Crystal Structures of <b>2b</b> and <b>3b</b> .                  | S29 |
| <b>Table S3.</b> Summary of Bond Distances and Angles for <b>2b</b> and <b>3b</b> . | S29 |
| <b>Figure S19.</b> Crystal Structure of <b>2c</b> .                                 | S30 |
| <b>Table S4.</b> Summary of Bond Distances and Angles for <b>2c</b> .               | S30 |
| <b>Figure S20.</b> Crystal Structure of <b>2d</b> .                                 | S31 |
| <b>Table S5.</b> Summary of Bond Distances and Angles for <b>2d</b> .               | S31 |

#### Computational Results

|                                                                                            |     |
|--------------------------------------------------------------------------------------------|-----|
| Complete citations for Refs 44 and 48.                                                     | S32 |
| <b>Table S6.</b> Free energy barriers for maleic anhydride + benzene.                      | S33 |
| <b>Table S7.</b> Gas phase energy barriers and free energy barriers.                       | S33 |
| <b>Table S8.</b> Inter-ring distances in <b>TS2</b> , <b>TS3</b> and the gas-phase dimers. | S33 |
| <b>Scheme S1.</b> Reactions of 1,3-butadiene + substrates <b>1a-1f</b>                     | S33 |
| <b>Table S9.</b> Energy barriers for butadiene + substrates <b>1a-1f</b> .                 | S34 |
| <b>Tables S10-S23.</b> Electronic energies, enthalpies, and free energies                  | S34 |
| B3LYP Optimized Cartesian coordinates (Å)                                                  | S38 |
| M05-2X Optimized Cartesian coordinates (Å)                                                 | S57 |
| M06-2X Optimized Cartesian coordinates (Å)                                                 | S85 |

|                   |     |
|-------------------|-----|
| <u>References</u> | S89 |
|-------------------|-----|

**Materials:** Silica gel (40  $\mu\text{m}$ ) was purchased from SiliCycle. Commercial grade anthracene (97%, Lancaster) was purified by recrystallization in hexanes (2x) followed by vacuum sublimation. All other reagent grade materials were purchased from Aldrich, Lancaster, Alfa Aesar, or Acros and used without further purification unless otherwise noted.

**Experimental:**

*NMR Spectroscopy:*  $^1\text{H}$  and  $^{13}\text{C}$  NMR spectra for all compounds were acquired in  $\text{CDCl}_3$  or  $d_6$ -DMSO on a Bruker Avance Spectrometer operating at 400 and 100 MHz, respectively. The chemical shift data are reported in units of  $\delta$  (ppm) relative to tetramethylsilane (TMS) and referenced with residual  $\text{CHCl}_3$  or DMSO.

*X-ray Crystallography:* Low temperature (100 K) diffraction data were collected on a Siemens Platform three-circle diffractometer coupled to a Bruker-AXS Smart Apex CCD detector with graphite-monochromated  $\text{Mo K}\alpha$  radiation ( $\lambda = 0.71073 \text{ \AA}$ ), performing  $\varphi$ - and  $\omega$ -scans. All structures were solved by direct methods using SHELXS<sup>1</sup> and refined against  $F^2$  on all data by full-matrix least squares with SHELXL-97<sup>2</sup> using established refinement strategies.<sup>3</sup> All non-hydrogen atoms were refined anisotropically. The hydrogen atoms were included in the model at geometrically calculated positions and refined using a riding model. The isotropic displacement parameters of all hydrogen atoms were fixed to 1.2 times the  $U$  value of the atoms they are linked to (1.5 times for methyl groups).

The crystal on which the structure for **2c** is based on was non-merohedrally twinned. Two independent orientation matrices for the unit cell were found using the program CELL\_NOW,<sup>4</sup> and data reduction taking into account the twinning was performed with SAINT.<sup>5</sup> The program TWINABS<sup>6</sup> was used to perform absorption correction and to set up the HKLF5 format file for structure refinement. The twin ratio was refined freely and converged at a value of 0.463(2).

## General Procedure for Diels–Alder Reaction

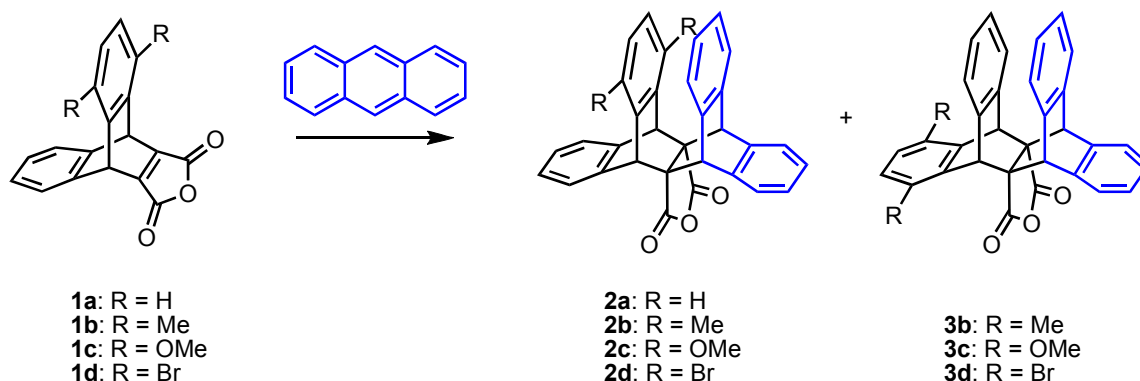

In a 20 mL RBF was placed **1** (50 mg), anthracene (10 equiv), and decane (4 mL). The flask was equipped with a stir bar and an N<sub>2</sub> inlet. The heterogeneous mixture was heated to 140-150 °C for 12-15 h. (The reaction becomes homogeneous with heating.) After cooling to room temperature, a sample was taken for <sup>1</sup>H NMR spectroscopic analysis to determine the product ratio (**2:3**, see **Figure S1**). Subsequent purification via column chromatography using 50/50 CH<sub>2</sub>Cl<sub>2</sub>/hexanes → neat CH<sub>2</sub>Cl<sub>2</sub> as the eluent provided the product. See **Table 1** for product ratios and isolated yields.

**Table 1.** Product Ratios and Isolated Yields

| Substrate         | <b>2:3<sup>a</sup></b> | Average<br><b>2:3</b> | Total Isolated Yield | Average<br>Yield |
|-------------------|------------------------|-----------------------|----------------------|------------------|
| <b>1a</b> (run 1) | --                     | --                    | 45 mg (56%)          | 64%              |
| <b>1a</b> (run 2) | --                     |                       | 58 mg (71%)          |                  |
| <b>1a</b> (run 3) | --                     |                       | 53 mg (65%)          |                  |
| <b>1b</b> (run 1) | <b>1:2</b>             | <b>1:3</b>            | <b>52 mg (66%)</b>   | <b>62%</b>       |
| <b>1b</b> (run 2) | <b>1:4</b>             |                       | <b>53 mg (67%)</b>   |                  |
| <b>1b</b> (run 3) | <b>1:2</b>             |                       | <b>43 mg (54%)</b>   |                  |
| <b>1c</b> (run 1) | 4:1                    | 5:1                   | 44 mg (58%)          | 62%              |
| <b>1c</b> (run 2) | 4:1                    |                       | 46 mg (61%)          |                  |
| <b>1c</b> (run 3) | 5:1                    |                       | 56 mg (74%)          |                  |
| <b>1c</b> (run 4) | 6:1                    |                       | 42 mg (54%)          |                  |
| <b>1d</b> (run 1) | <b>12:1</b>            | <b>17:1</b>           | <b>49 mg (67%)</b>   | <b>77%</b>       |
| <b>1d</b> (run 2) | <b>20:1</b>            |                       | <b>62 mg (85%)</b>   |                  |
| <b>1d</b> (run 3) | <b>20:1</b>            |                       | <b>57 mg (78%)</b>   |                  |

<sup>a</sup>Ratio is based on <sup>1</sup>H NMR spectral integration of the crude reaction mixture (see **Figure S1**).

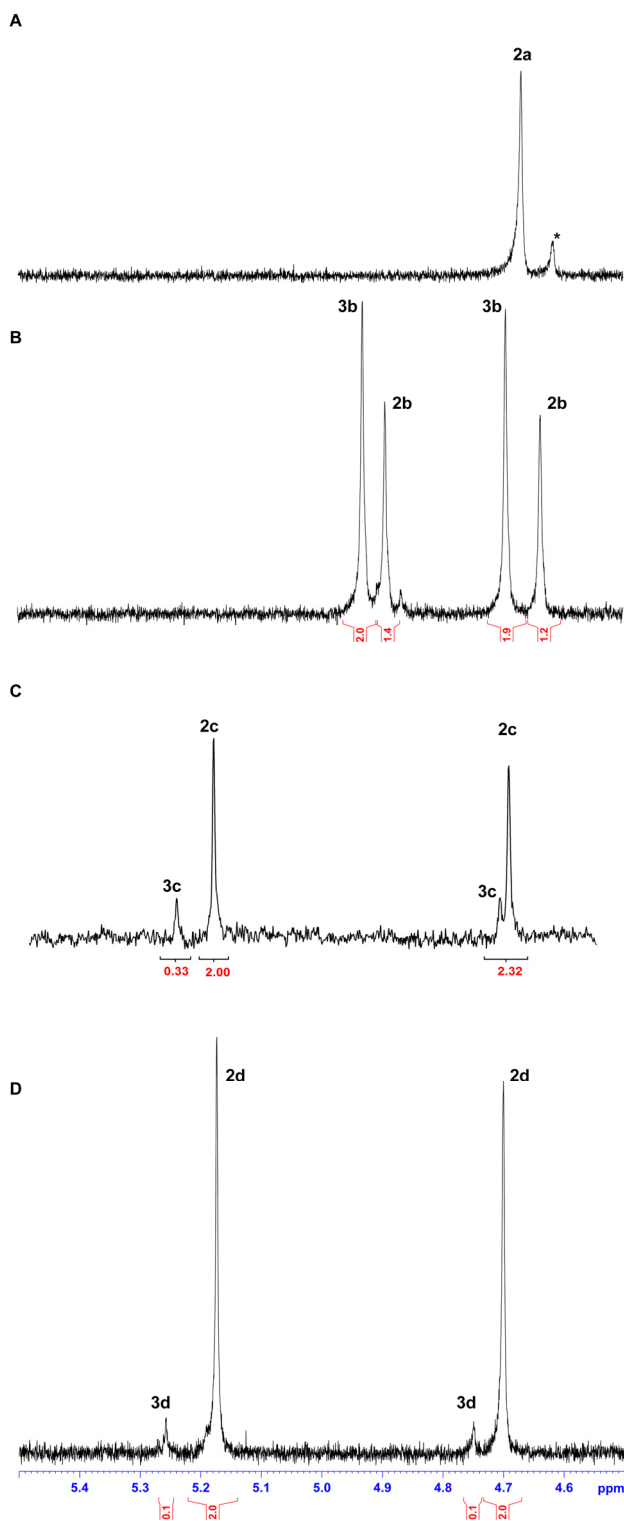

**Figure S1.**  $^1\text{H}$  NMR Spectra of the crude reaction mixture from the general procedure. The resonances correspond to the bridgehead protons for products **2** and **3**. (A) R = H; (B) R = Me; (C) R = OMe; (D) R = Br. \* denotes an unidentified impurity.

### Control Experiment #1

---

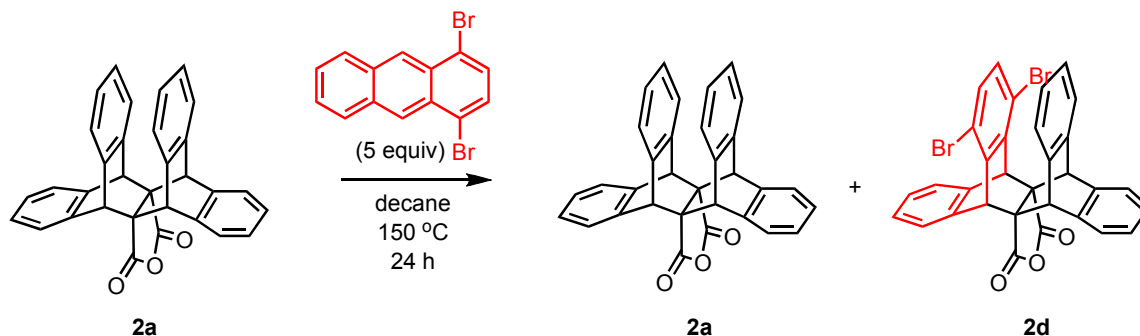

In a 20 mL RBF was placed **2a** (12 mg), 1,4-dibromoanthracene (5 equiv), and decane (2 mL). The flask was equipped with a stir bar and an N<sub>2</sub> inlet. The heterogeneous mixture was heated to 150 °C for 24 h. (The reaction becomes homogeneous with heating.) After cooling to room temperature, a sample was taken for <sup>1</sup>H NMR spectroscopic analysis to determine the product ratio (**2a**:**2d**). As shown in **Figure S2**, **2d** was not observed, indicating the retro-Diels-Alder reaction is not occurring under the reaction conditions.

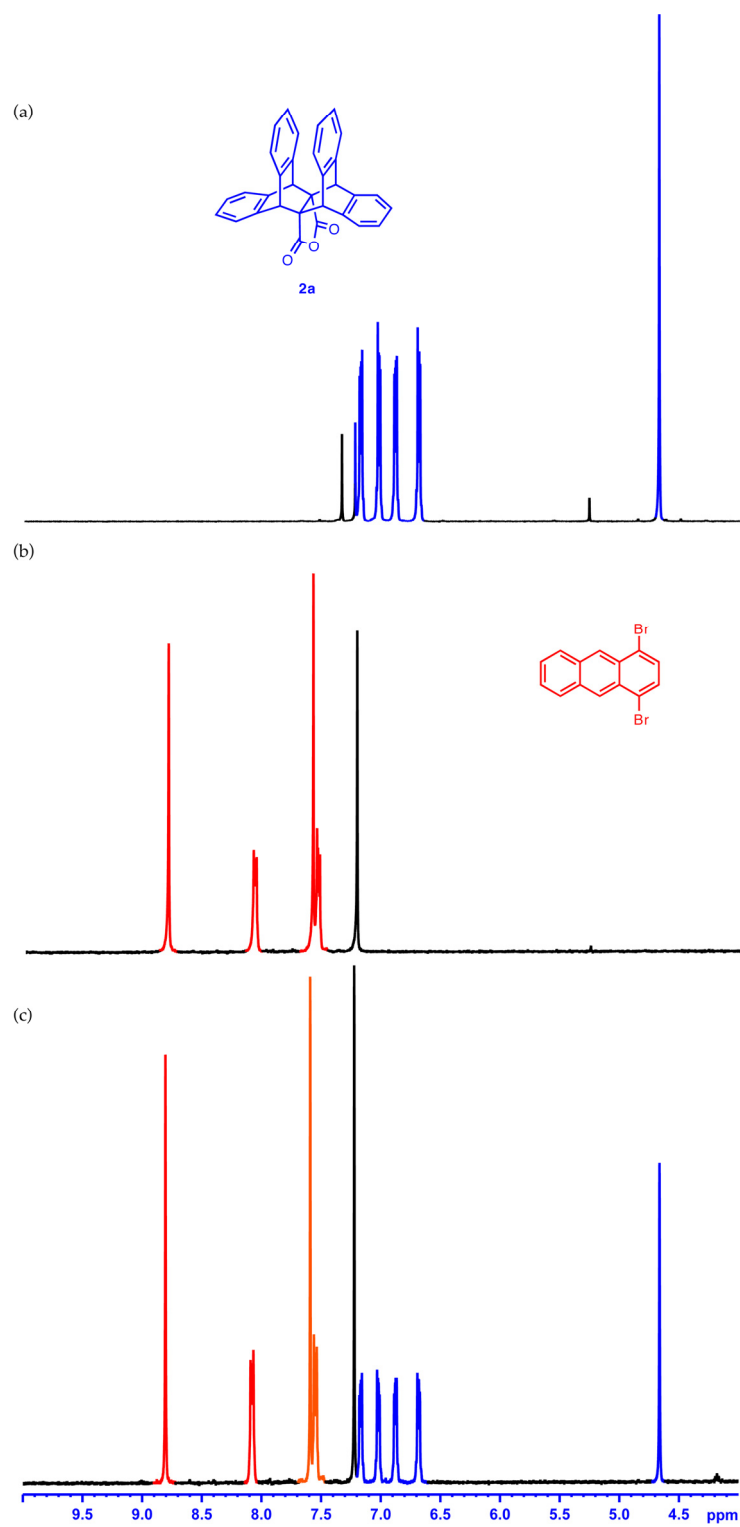

**Figure S2.**  $^1\text{H}$  NMR Spectra of (a) **2a**, (b) 1,4-dibromoanthracene, and (c) the crude reaction mixture of **2a** with excess 1,4-dibromoanthracene.

## Control Experiment #2

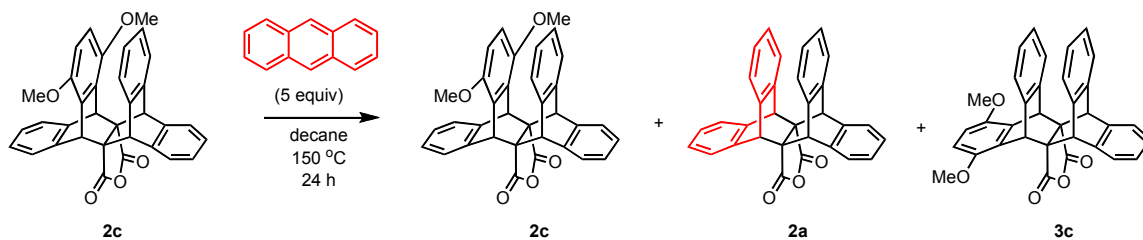

In a 10 mL vial was placed **2c** (15 mg), anthracene (5 equiv), and decane (2 mL). The vial was equipped with a stir bar and sealed. The heterogeneous mixture was heated to 150 °C for 24 h. (The reaction becomes homogeneous with heating.) After cooling to room temperature, a sample was taken for  $^1\text{H}$  NMR spectroscopic analysis to determine the product ratio (**2c:2a:3c**). As shown in **Figure S3**, neither **2a** nor **3c** was observed, indicating that a retro-Diels-Alder reaction is not occurring under the reaction conditions.



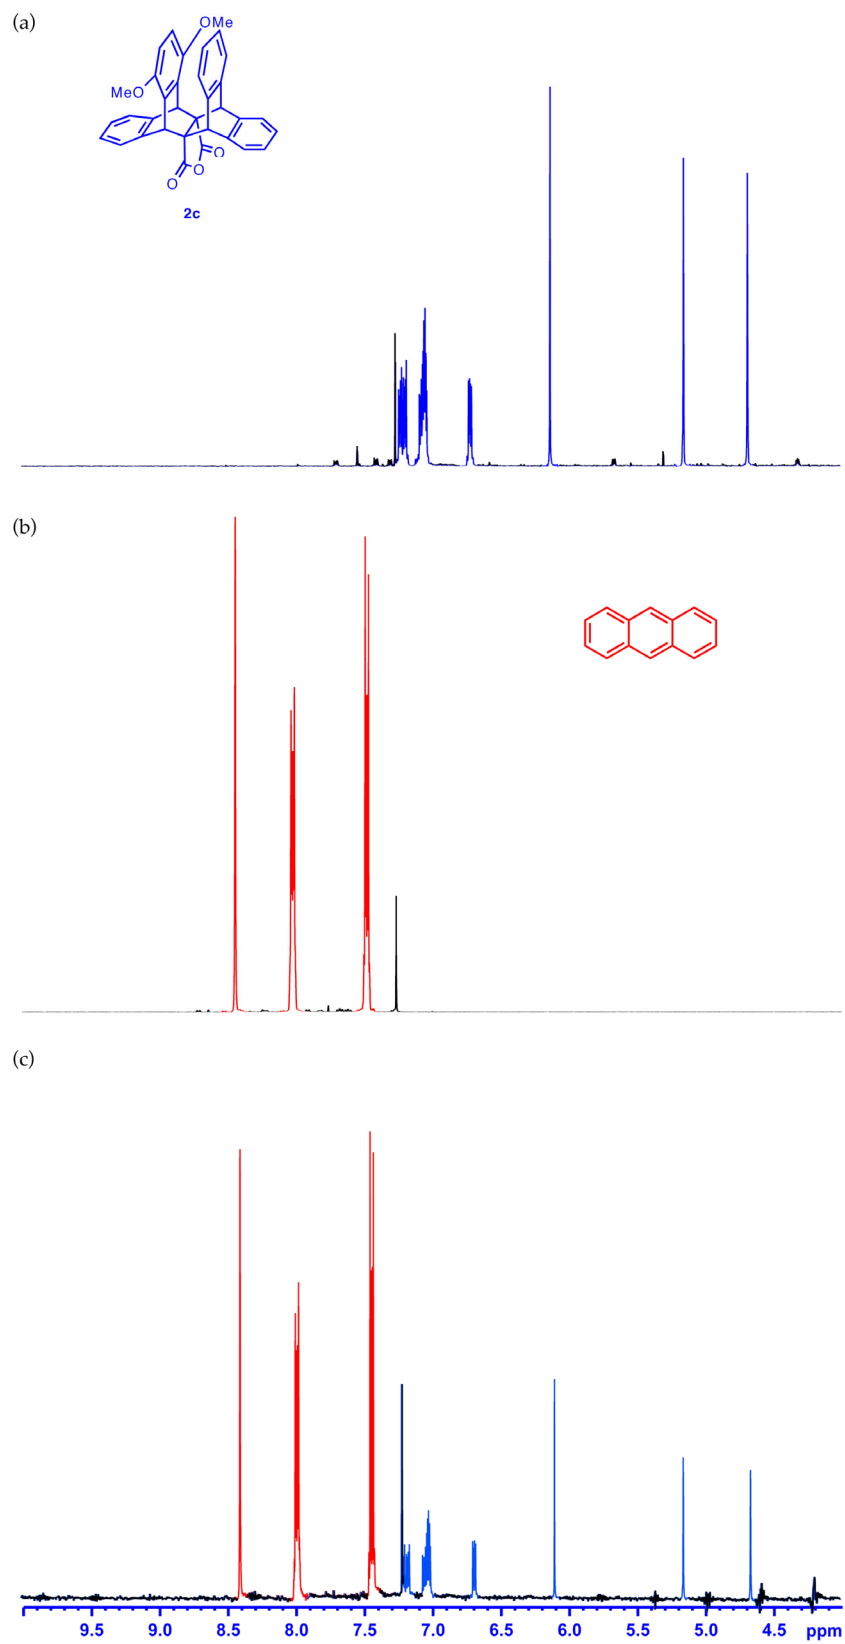

**Figure S3.**  $^1\text{H}$  NMR Spectra of (a) **2c**, (b) anthracene, and (c) the crude reaction mixture of **2c** with excess anthracene.

## Synthesis of 1a

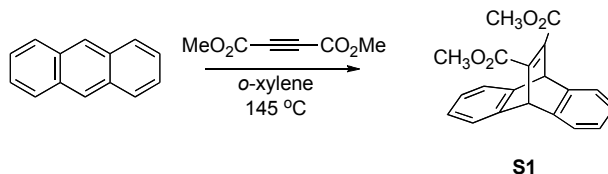

**S1**: A 100 mL round-bottom flask was equipped with a stir bar, reflux condenser, and an argon inlet. Sequentially, anthracene (1.0 g, 5.6 mmol), dimethylacetylene dicarboxylate (6.9 mL, 56 mmol) and *o*-xylene (15 mL) were added to the flask. The reaction mixture was heated to  $145\text{ }^\circ\text{C}$  overnight. After cooling to room temperature, the reaction mixture was concentrated in vacuo and then purified by column chromatography using 50/50 hexanes/ $\text{CH}_2\text{Cl}_2$  as the eluent to give a sticky off-white solid. MeOH was added to dissolve the excess acetylene and the mixture was filtered to give 1.13 g of pure **S1** as a white, crystalline solid (63% yield). HRMS (ESI): Calcd. for  $\text{C}_{20}\text{H}_{16}\text{O}_4$ , 343.0941  $[\text{M}+\text{Na}]^+$ ; found, 343.0931.

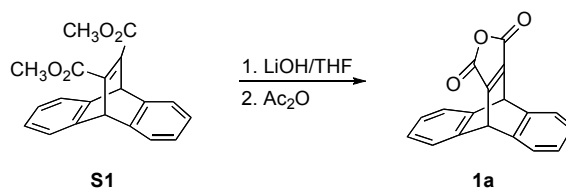

**1a**: A 50 mL round-bottom flask was equipped with a stir bar. Sequentially, lithium hydroxide (0.75 g, 30 mmol), **S1** (1.0 g, 3.0 mmol), THF (15 mL) and water (5 mL) were added to the flask. The heterogeneous mixture was loosely capped and heated to  $40\text{ }^\circ\text{C}$  overnight. After cooling to room temperature, EtOAc was added and an aq. HCl solution (10%) until the pH strip indicated the aqueous layer was acidic. The aqueous layer was extracted with EtOAc (3 x 50 mL) and dried over  $\text{Na}_2\text{SO}_4$ . The solution was concentrated in vacuo to produce a sticky solid. Acetic anhydride (~50 mL) was added and the flask was capped and stirred at  $60\text{ }^\circ\text{C}$  overnight. After cooling to room temperature, toluene (50 mL) was added and the solution was concentrated in vacuo to yield an off-white solid. Hexanes were added and the mixture was filtered to give a white precipitate (0.55 g, 66% yield). HRMS (ESI): Calcd. for  $\text{C}_{18}\text{H}_{10}\text{O}_3$ , 275.0703  $[\text{M}+\text{H}]^+$ ; found, 275.0699.

## Synthesis of 1b

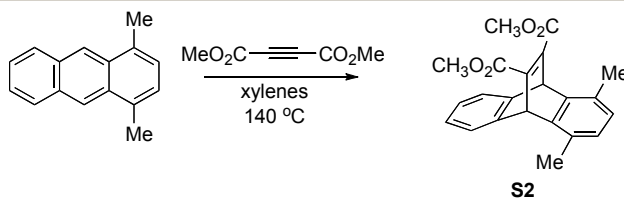

1,4-dimethylantracene was prepared according to a literature procedure.<sup>7</sup>

**S2**: A 75 mL bomb flask was equipped with a stir bar. Sequentially, 1,4-dimethylantracene (0.75 g, 3.6 mmol), dimethylacetylene dicarboxylate (4.5 mL, 36 mmol) and *o*-xylene (6 mL) were added to the flask. The reaction mixture was heated to  $140\text{ }^\circ\text{C}$  overnight. After cooling to room temperature, the reaction mixture was concentrated in vacuo and then purified by column chromatography using 50/50 hexanes/ $\text{CH}_2\text{Cl}_2 \rightarrow$  neat  $\text{CH}_2\text{Cl}_2$  as the eluent to give a sticky off-white solid. MeOH was added to dissolve the excess acetylene and the mixture was filtered to give 0.67 g of pure **S2** as an off-white, crystalline solid (54% yield). HRMS (ESI): Calcd. for  $\text{C}_{22}\text{H}_{20}\text{O}_4$ , 371.1254  $[\text{M}+\text{Na}]^+$ ; found, 371.1256.

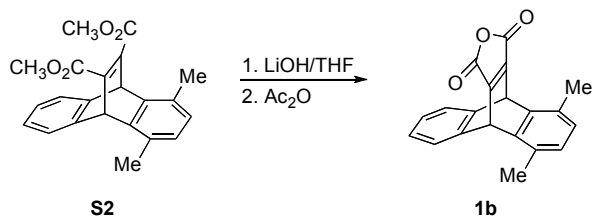

**1b**: A 50 mL round-bottom flask was equipped with a stir bar. Sequentially, lithium hydroxide (0.46 g, 19 mmol), **S2** (0.67 g, 1.9 mmol), THF (10 mL) and water (5 mL) were added to the flask. The heterogeneous mixture was loosely capped and heated to  $40\text{ }^\circ\text{C}$  overnight. After cooling to room temperature, EtOAc was added and an aq. HCl solution (10%) until the pH strip indicated the aqueous layer was acidic. The aqueous layer was extracted with EtOAc (3 x 50 mL) and dried over  $\text{Na}_2\text{SO}_4$ . The solution was concentrated in vacuo to produce an oil. Acetic anhydride (~50 mL) was added and the flask was capped and stirred at  $60\text{ }^\circ\text{C}$  overnight. After cooling to room temperature, toluene (50 mL) was added and the solution was concentrated in vacuo to yield a light yellow solid. Hexanes were added and the mixture was filtered to give a light yellow precipitate (0.44 g, 67% yield). HRMS (ESI): Calcd. for  $\text{C}_{20}\text{H}_{14}\text{O}_3$ , 303.1016  $[\text{M}+\text{H}]^+$ ; found, 303.1012.

## Synthesis of 1c

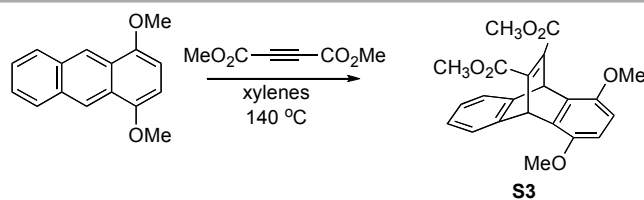

1,4-dimethoxyanthracene was synthesized according to literature protocol.<sup>8</sup>

**S3**: A 50 mL round-bottom flask was equipped with a stir bar and reflux condenser. Sequentially, 1,4-dimethoxyanthracene (0.69 g, 2.9 mmol), dimethylacetylene dicarboxylate (3.5 mL, 29 mmol) and *o*-xylene (10 mL) were added to the flask. The reaction mixture was heated to  $140\text{ }^\circ\text{C}$  overnight. After cooling to room temperature, the reaction mixture was concentrated in vacuo and then purified by column chromatography using 50/50 hexanes/ $\text{CH}_2\text{Cl}_2 \rightarrow$  neat  $\text{CH}_2\text{Cl}_2$  as the eluent to give a yellow solid. MeOH was added to dissolve the excess acetylene and the mixture was filtered to give 307 mg of pure **S3** as a yellow crystalline solid (28% yield). HRMS (ESI): Calcd. for  $\text{C}_{22}\text{H}_{20}\text{O}_6$ , 381.1333  $[\text{M}+\text{H}]^+$ ; found, 381.1344.

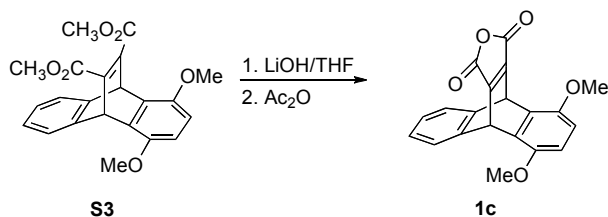

**1c**: A 50 mL round-bottom flask was equipped with a stir bar. Sequentially, lithium hydroxide (0.19 g, 8.1 mmol), **S3** (0.31 g, 0.81 mmol), THF (10 mL) and water (5 mL) were added to the flask. The heterogeneous mixture was loosely capped and heated to  $40\text{ }^\circ\text{C}$  overnight. After cooling to room temperature, EtOAc was added and an aq. HCl solution (10%) until the pH strip indicated the aqueous layer was acidic. The aqueous layer was extracted with EtOAc (3 x 50 mL) and dried over  $\text{Na}_2\text{SO}_4$ . The solution was concentrated in vacuo to produce a yellow solid. Acetic anhydride (~40 mL) was added and the flask was capped and stirred at  $60\text{ }^\circ\text{C}$  overnight. After cooling to room temperature, toluene (50 mL) was added and the solution was concentrated in vacuo to yield a bright yellow solid (0.27 g, 99% yield). HRMS (ESI): Calcd. for  $\text{C}_{20}\text{H}_{14}\text{O}_5$ , 335.0914  $[\text{M}+\text{H}]^+$ ; found, 335.0923.

## Synthesis of 1d

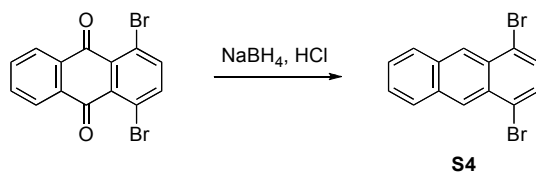

1,4-dibromoanthraquinone was synthesized via literature procedure.<sup>9</sup>

**S4:** A 25 mL round-bottom flask was equipped with a stir bar. Sequentially, 1,4-dibromoanthraquinone (0.50 g, 1.4 mmol), NaBH<sub>4</sub> (0.212 g, 5.6 mmol), and *i*-PrOH (5 mL) were added to the flask. The heterogeneous mixture was capped and stirred at rt overnight. The mixture was poured into ice-water and filtered. The solid was placed in a 100 mL round-bottom flask and 3M HCl (20 mL) was added and the mixture was heated at 75 °C overnight. The solid was collected via filtration and placed in a 25 mL round-bottom flask. NaBH<sub>4</sub> (0.33 g, 8.6 mmol) and *i*-PrOH (10 mL) were added and the mixture was heated to reflux overnight. 3 M HCl was then added until bubbling ceased and the solid was collected via filtration. The product was purified by column chromatography using 80/20 hexanes/CH<sub>2</sub>Cl<sub>2</sub> as the eluent to give a yellow, fluffy solid (0.21 g, 42% yield).

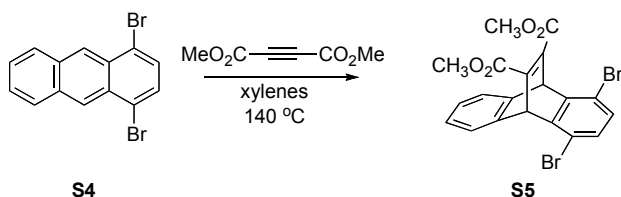

**S5:** A 75 mL bomb flask was equipped with a stir bar. Sequentially, **S4** (236 mg, 0.78 mmol), dimethylacetylene dicarboxylate (0.96 mL, 7.8 mmol) and *o*-xylene (10 mL) were added to the flask. The reaction mixture was heated to 145 °C overnight. After cooling to room temperature, the reaction mixture was concentrated in vacuo and then purified by column chromatography using 50/50 hexanes/CH<sub>2</sub>Cl<sub>2</sub> neat CH<sub>2</sub>Cl<sub>2</sub> as the eluent to give an oil. MeOH/CH<sub>2</sub>Cl<sub>2</sub> (50 mL) was added and subsequent concentration led to a sticky solid. MeOH was added to dissolve the excess acetylene and the mixture was filtered to give 225 mg of pure **S5** as an off-white solid (61% yield). HRMS (ESI): Calcd. for C<sub>20</sub>H<sub>14</sub>Br<sub>2</sub>O<sub>4</sub>, 498.9151 [M+Na]<sup>+</sup>; found, 498.9167.

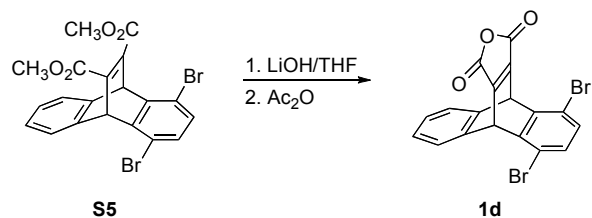

**1d**: A 50 mL round-bottom flask was equipped with a stir bar. Sequentially, lithium hydroxide (100 mg, 4.2 mmol), **S5** (200 mg, 0.42 mmol), THF (5 mL) and water (5 mL) were added to the flask. The heterogeneous mixture was loosely capped and heated to 40 °C overnight. After cooling to room temperature, EtOAc was added and an aq. HCl solution (10%) until the pH strip indicated the aqueous layer was acidic. The aqueous layer was extracted with EtOAc (3 x 50 mL) and dried over Na<sub>2</sub>SO<sub>4</sub>. The solution was concentrated in vacuo to produce a sticky solid. Acetic anhydride (~15 mL) was added and the flask was capped and stirred at 60 °C overnight. After cooling to room temperature, toluene (50 mL) was added and the solution was concentrated in vacuo to yield an off-white solid. Hexanes were added and the mixture was filtered to give a white precipitate (114 mg, 63% yield). HRMS (ESI): Calcd. for C<sub>18</sub>H<sub>8</sub>Br<sub>2</sub>O<sub>3</sub>, 430.8913 [M+H]<sup>+</sup>; found, 430.8907.

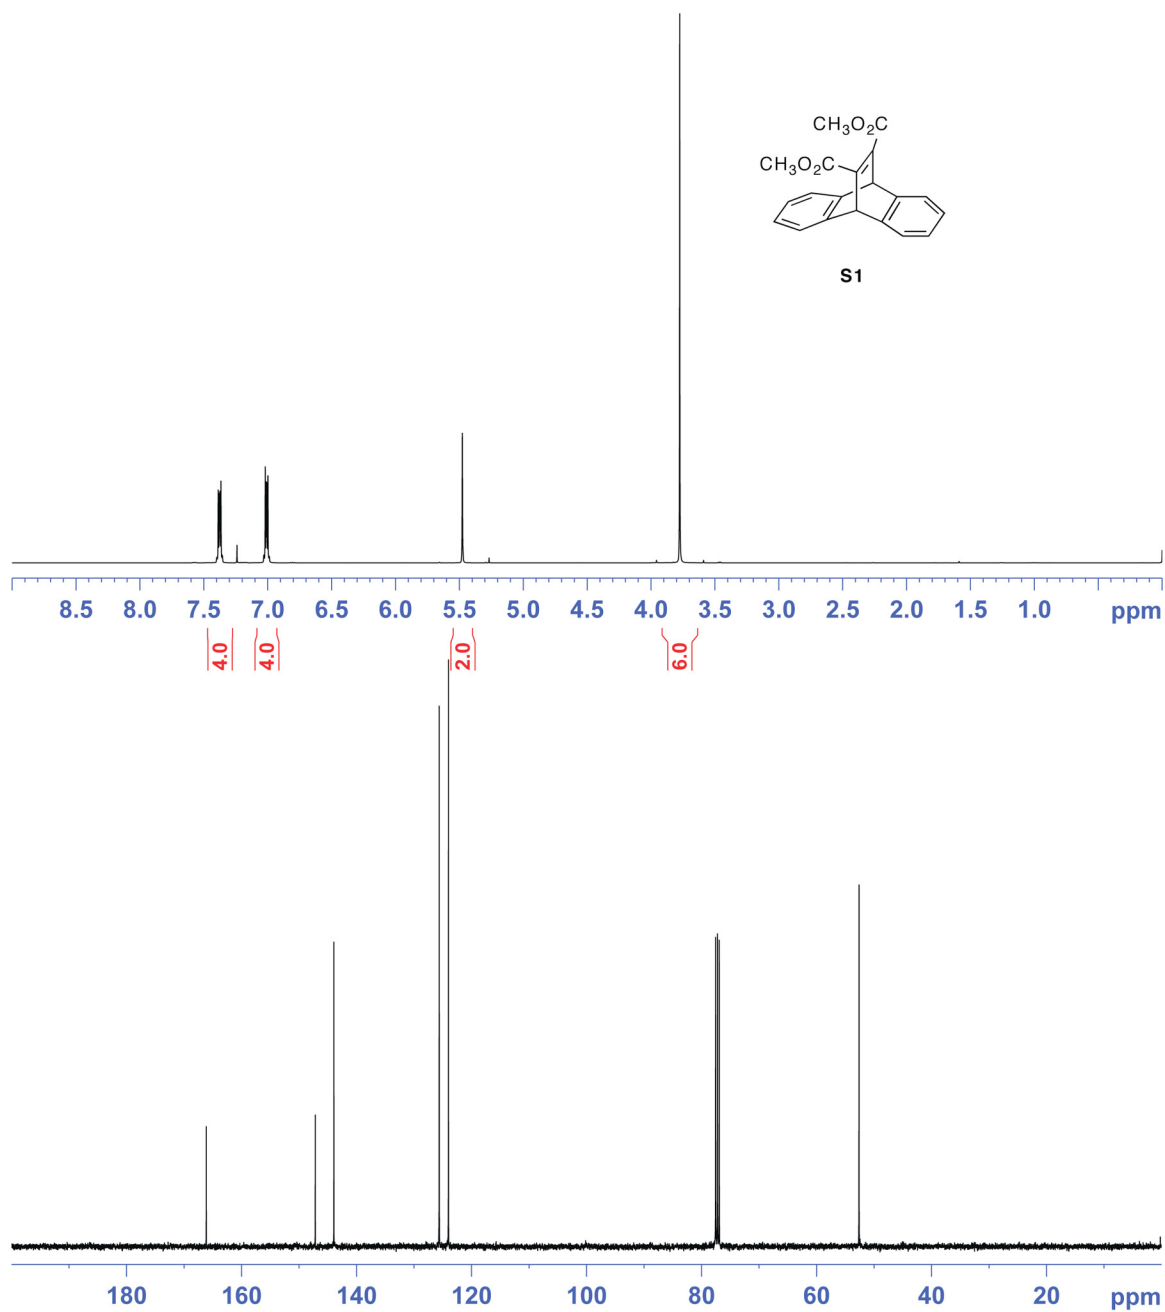

**Figure S4.** <sup>1</sup>H and <sup>13</sup>C NMR spectra of **S1**. <sup>1</sup>H NMR (400 MHz, CDCl<sub>3</sub>) δ 7.37 (m, 4H), 7.01 (m, 4H), 5.48 (s, 2H), 3.77 (s, 6H). <sup>13</sup>C NMR (100 MHz, CDCl<sub>3</sub>) δ 166.12, 147.17, 143.93, 125.61, 124.01, 52.61, 52.60.

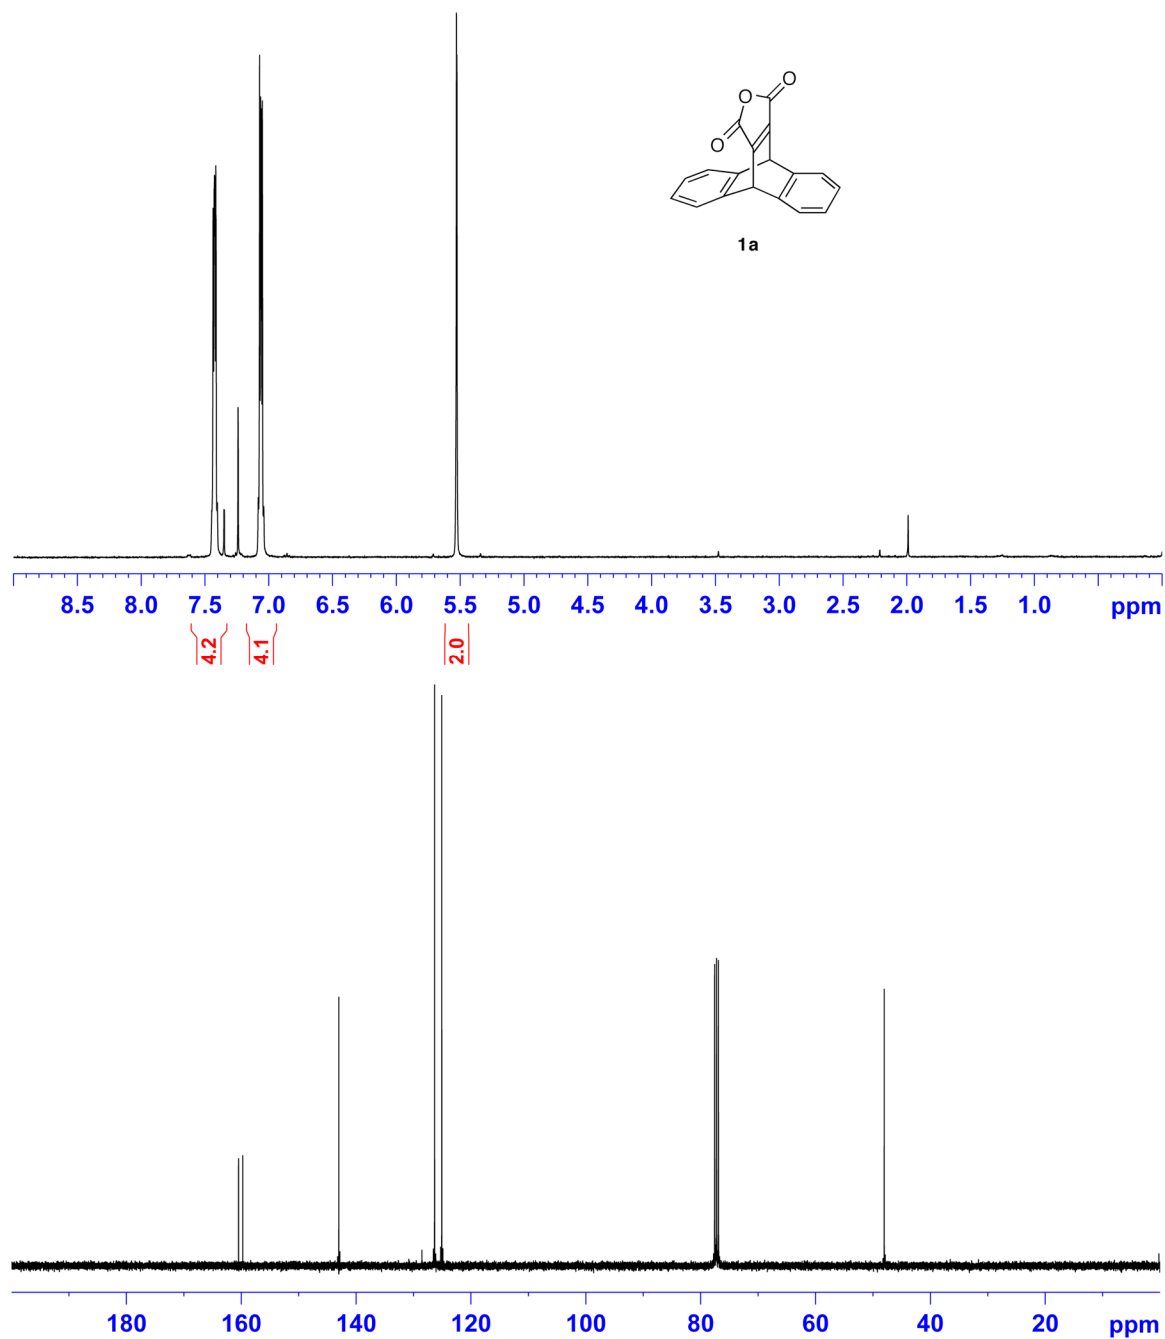

**Figure S5.**  $^1\text{H}$  and  $^{13}\text{C}$  NMR spectra of **1a**.  $^1\text{H}$  NMR (400 MHz,  $\text{CDCl}_3$ )  $\delta$  7.42 (m, 4H), 7.06 (m, 4H), 5.53 (s, 2H).  $^{13}\text{C}$  NMR (100 MHz,  $\text{CDCl}_3$ )  $\delta$  160.45, 159.71, 143.01, 126.33, 125.08, 48.03.



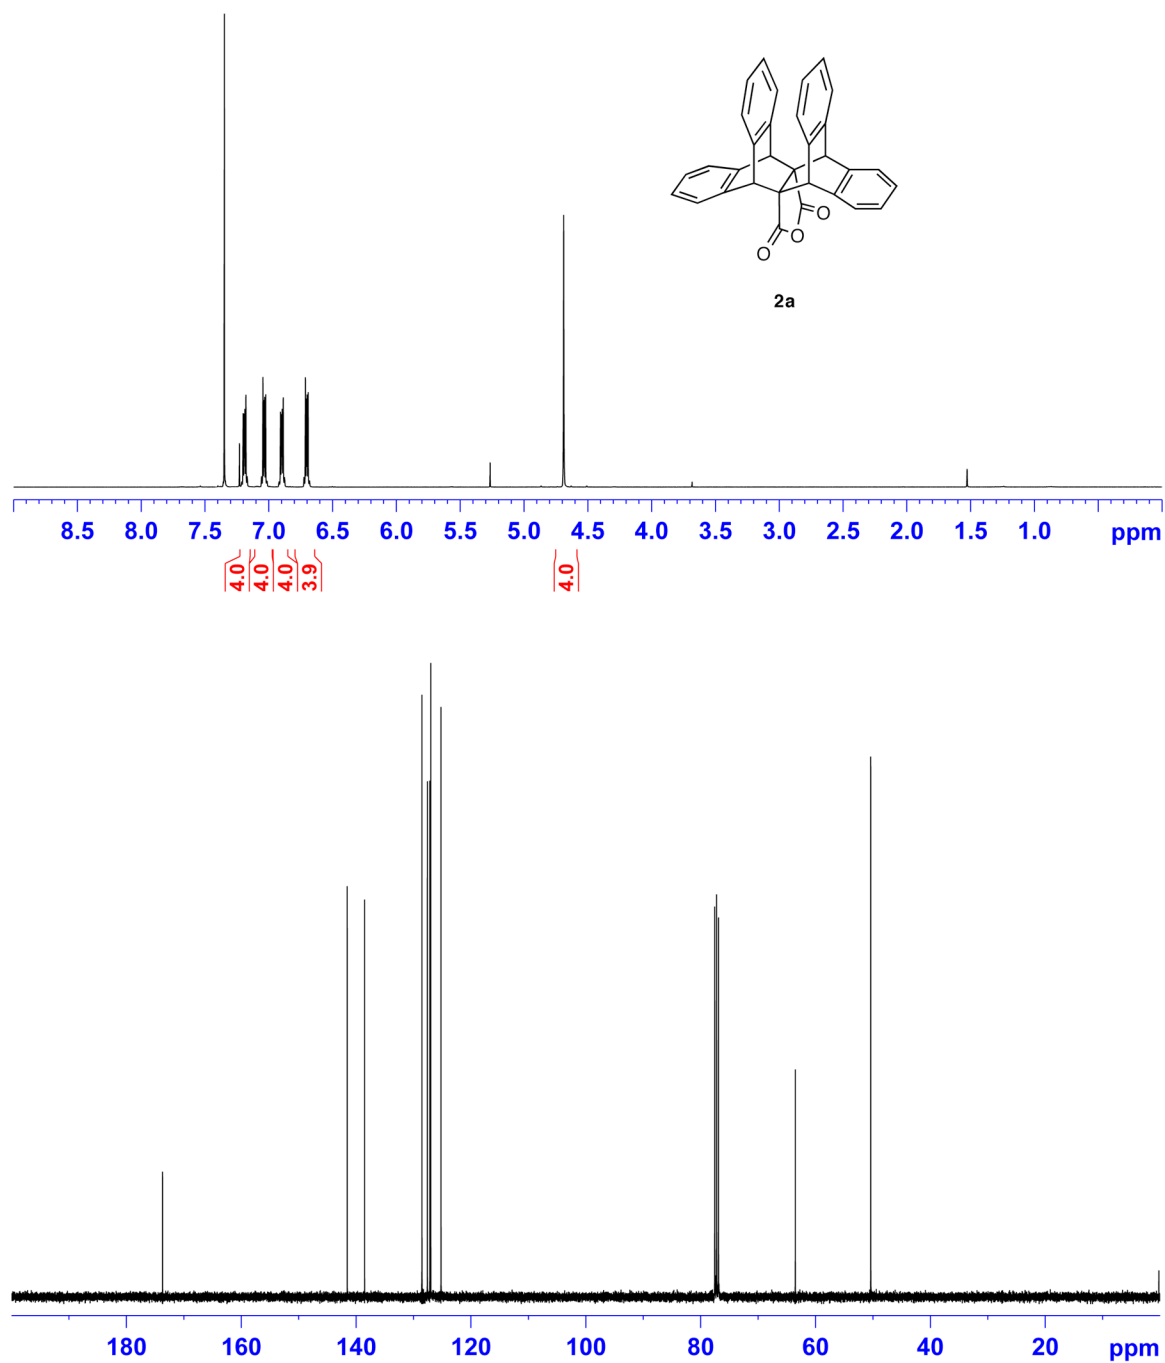

**Figure S6.** <sup>1</sup>H and <sup>13</sup>C NMR spectra of **2a**. <sup>1</sup>H NMR (400 MHz, CDCl<sub>3</sub>) δ 7.19 (m, 4H), 7.04 (m, 4H), 6.89 (m, 4H), 6.70 (m, 4H), 4.69 (s, 4H). <sup>13</sup>C NMR (100 MHz, CDCl<sub>3</sub>) δ 173.68, 141.54, 138.51, 128.53, 127.59, 127.14, 126.98, 125.20, 63.51, 50.38.

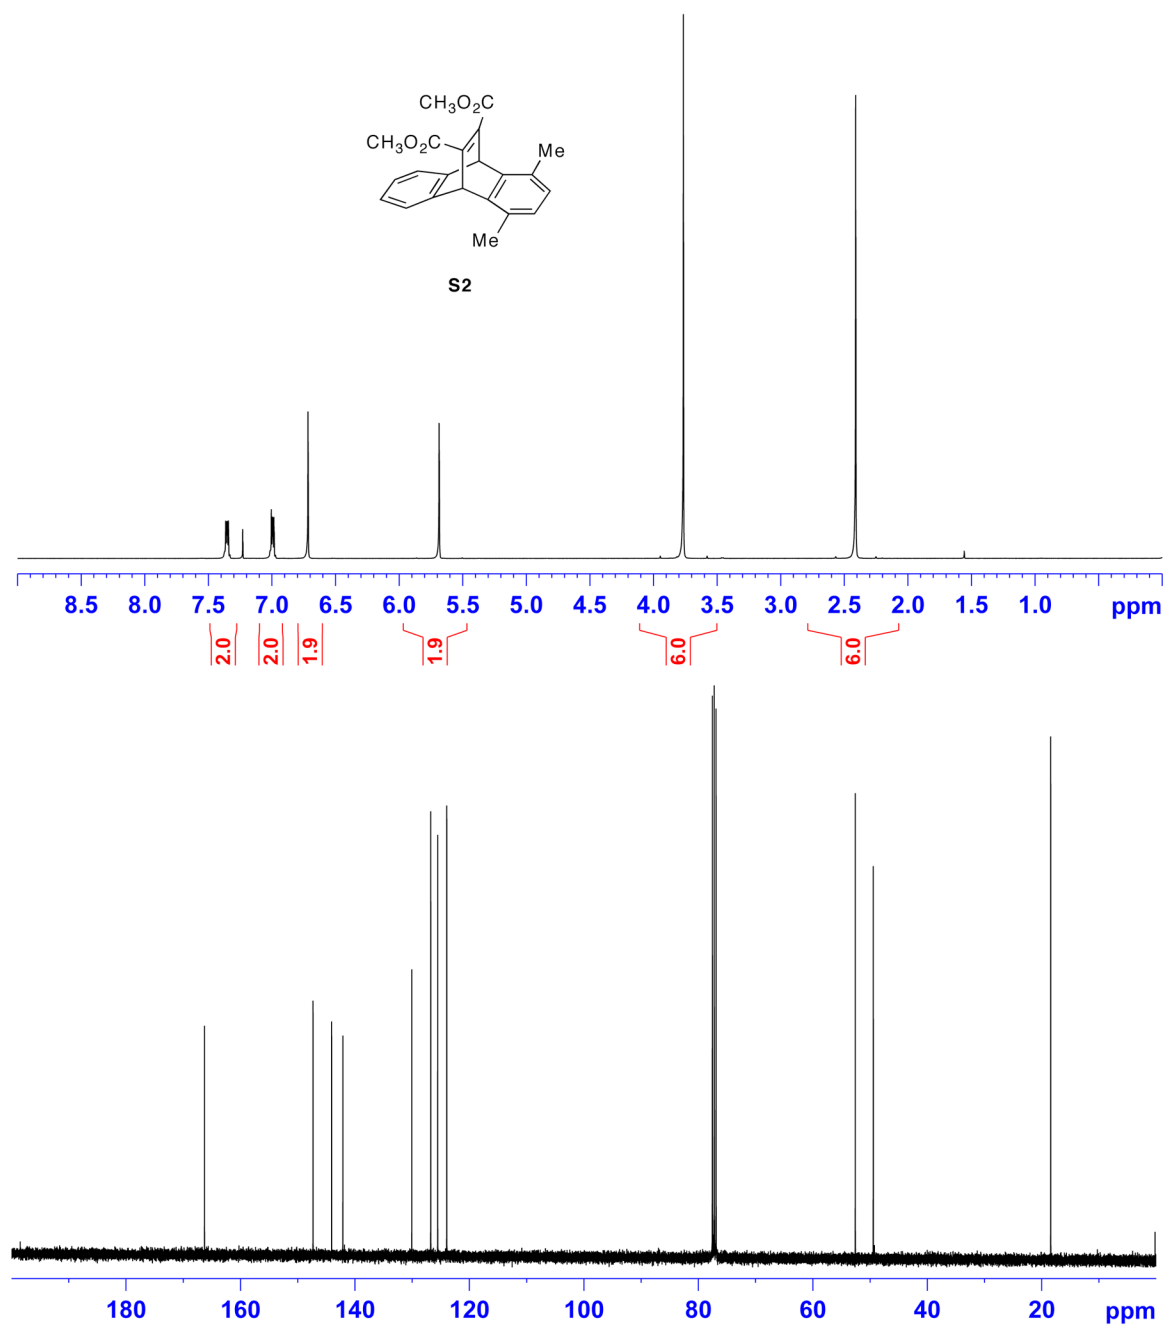

**Figure S7.** <sup>1</sup>H and <sup>13</sup>C NMR spectra of **S2**. <sup>1</sup>H NMR (400 MHz, CDCl<sub>3</sub>) δ 7.35 (m, 2H), 6.99 (m, 2H), 6.71 (s, 2H), 5.68 (s, 2H), 3.77 (s, 6H), 2.41 (s, 6H). <sup>13</sup>C NMR (100 MHz, CDCl<sub>3</sub>) δ 166.27, 147.30, 144.06, 142.09, 130.06, 126.75, 125.53, 123.95, 52.56, 49.43, 18.41.

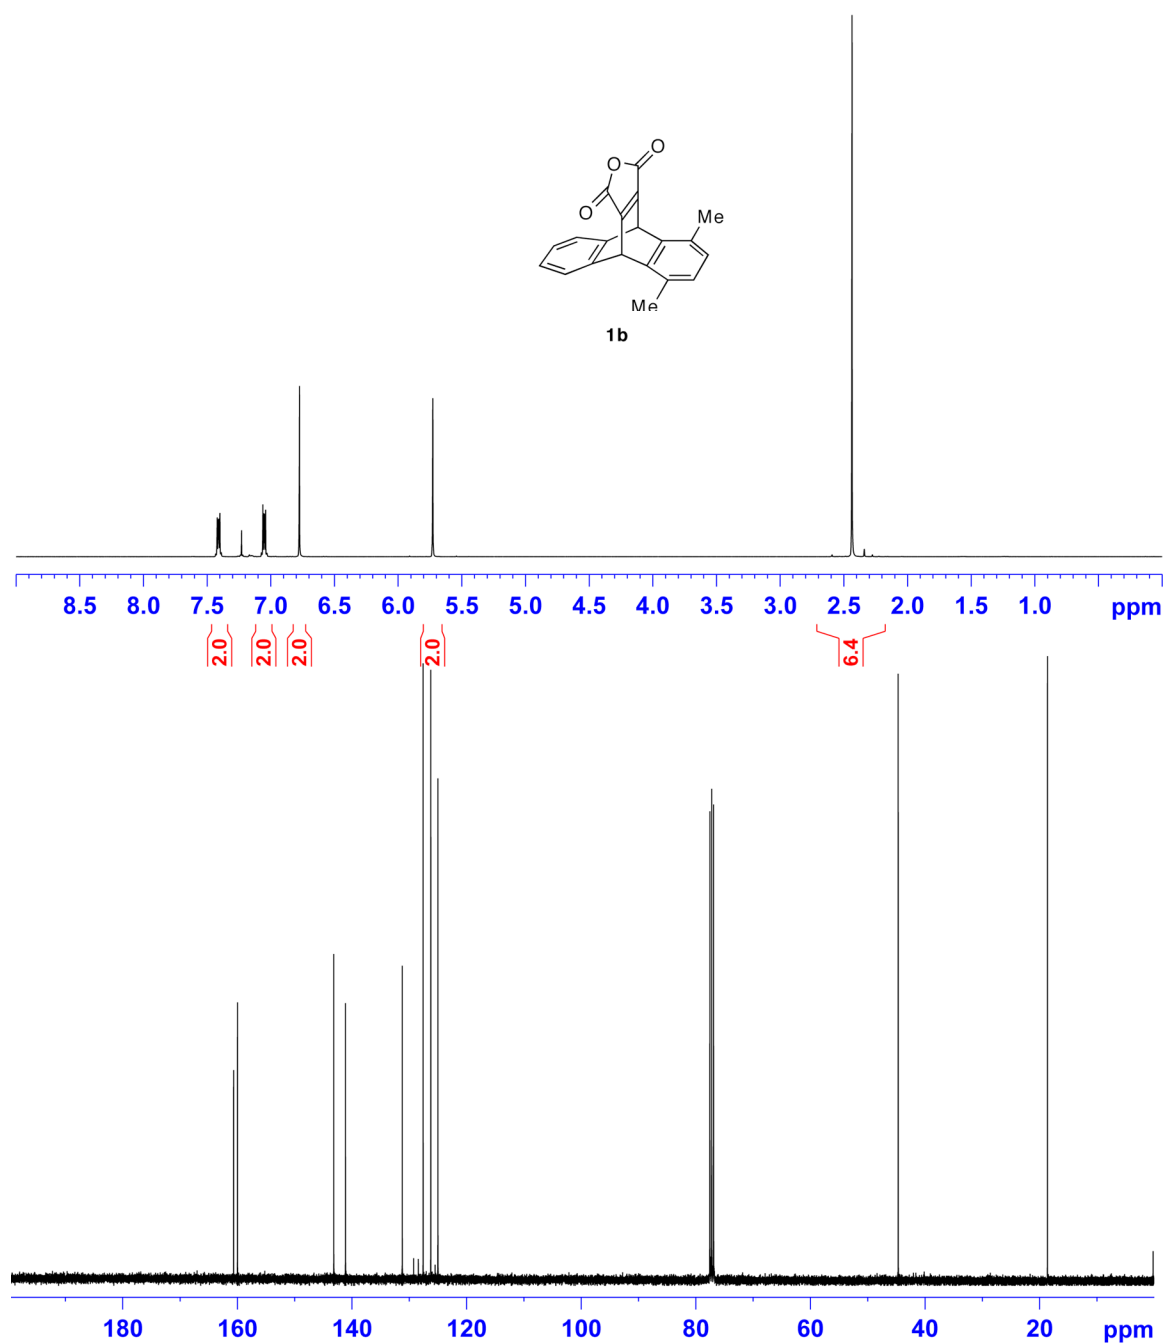

**Figure S8.** <sup>1</sup>H and <sup>13</sup>C NMR spectra of **1b**. <sup>1</sup>H NMR (400 MHz, CDCl<sub>3</sub>) δ 7.41 (m, 2H), 7.05 (m, 2H), 6.77 (s, 2H), 5.73 (s, 2H), 2.44 (s, 6H). <sup>13</sup>C NMR (100 MHz, CDCl<sub>3</sub>) δ 160.65, 159.97, 143.41, 141.13, 131.22, 127.58, 126.24, 124.99, 44.68, 18.63.

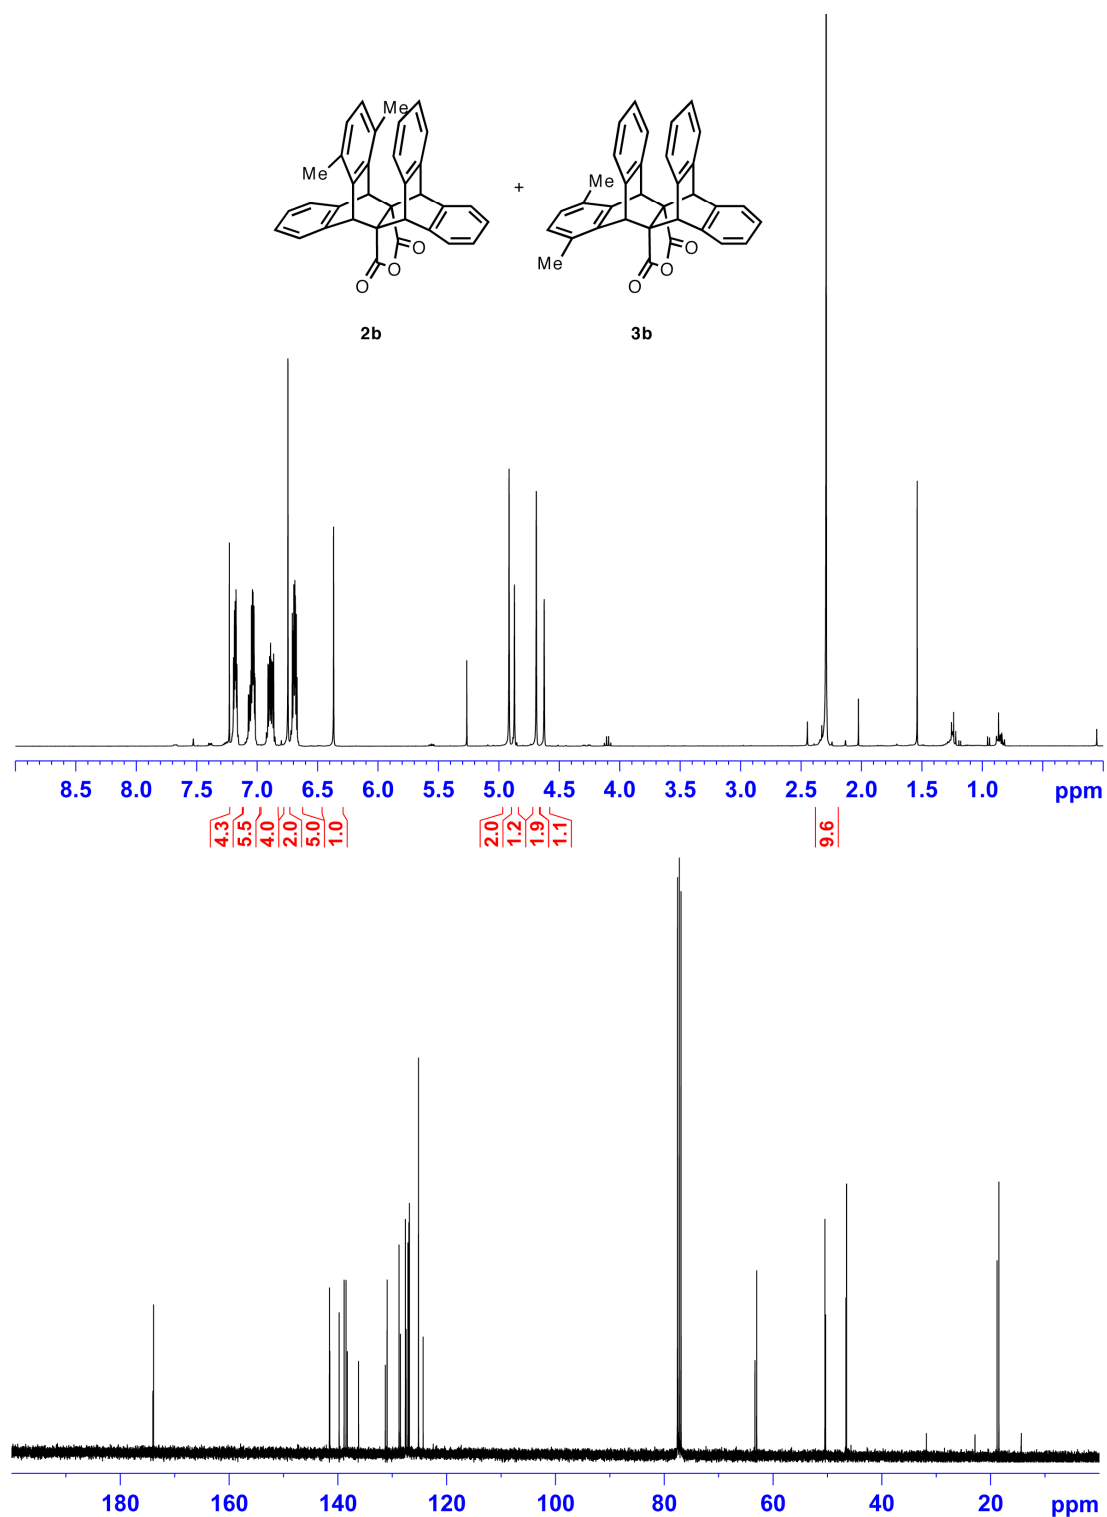

**Figure S9.**  $^1\text{H}$  and  $^{13}\text{C}$  NMR spectra of **2b/3b** (1/2 ratio).  $^1\text{H}$  NMR (400 MHz,  $\text{CDCl}_3$ )  $\delta$  7.18 (m, 2H, **2H**), 7.04 (m, 4H, **1H**), 6.89 (m 2H, **2H**), 6.70 (s, 2H), 6.69 (m, 4H, **1H**), **6.37** (s, 1H), 4.91 (s, 2H), **4.87** (s, 1H), 4.69 (s, 2H), **4.62** (s, 1H), 2.29 (s, 6H, **3H**).  $^{13}\text{C}$  NMR (100 MHz,  $\text{CDCl}_3$ )  $\delta$  **173.99**, 173.88, **141.56**, 141.54, **141.53**, **141.48**, **139.76**, 138.85, 138.49, **138.25**, **136.19**, **131.27**, 130.93, 128.74, **128.49**, 127.58, **127.53**, 127.45, **127.11**, **126.98**, 126.95, 126.85, 125.17, **124.31**, **63.31**, 62.98, 50.45, **50.32**, **46.58**, 46.48, **18.81**, 18.47.

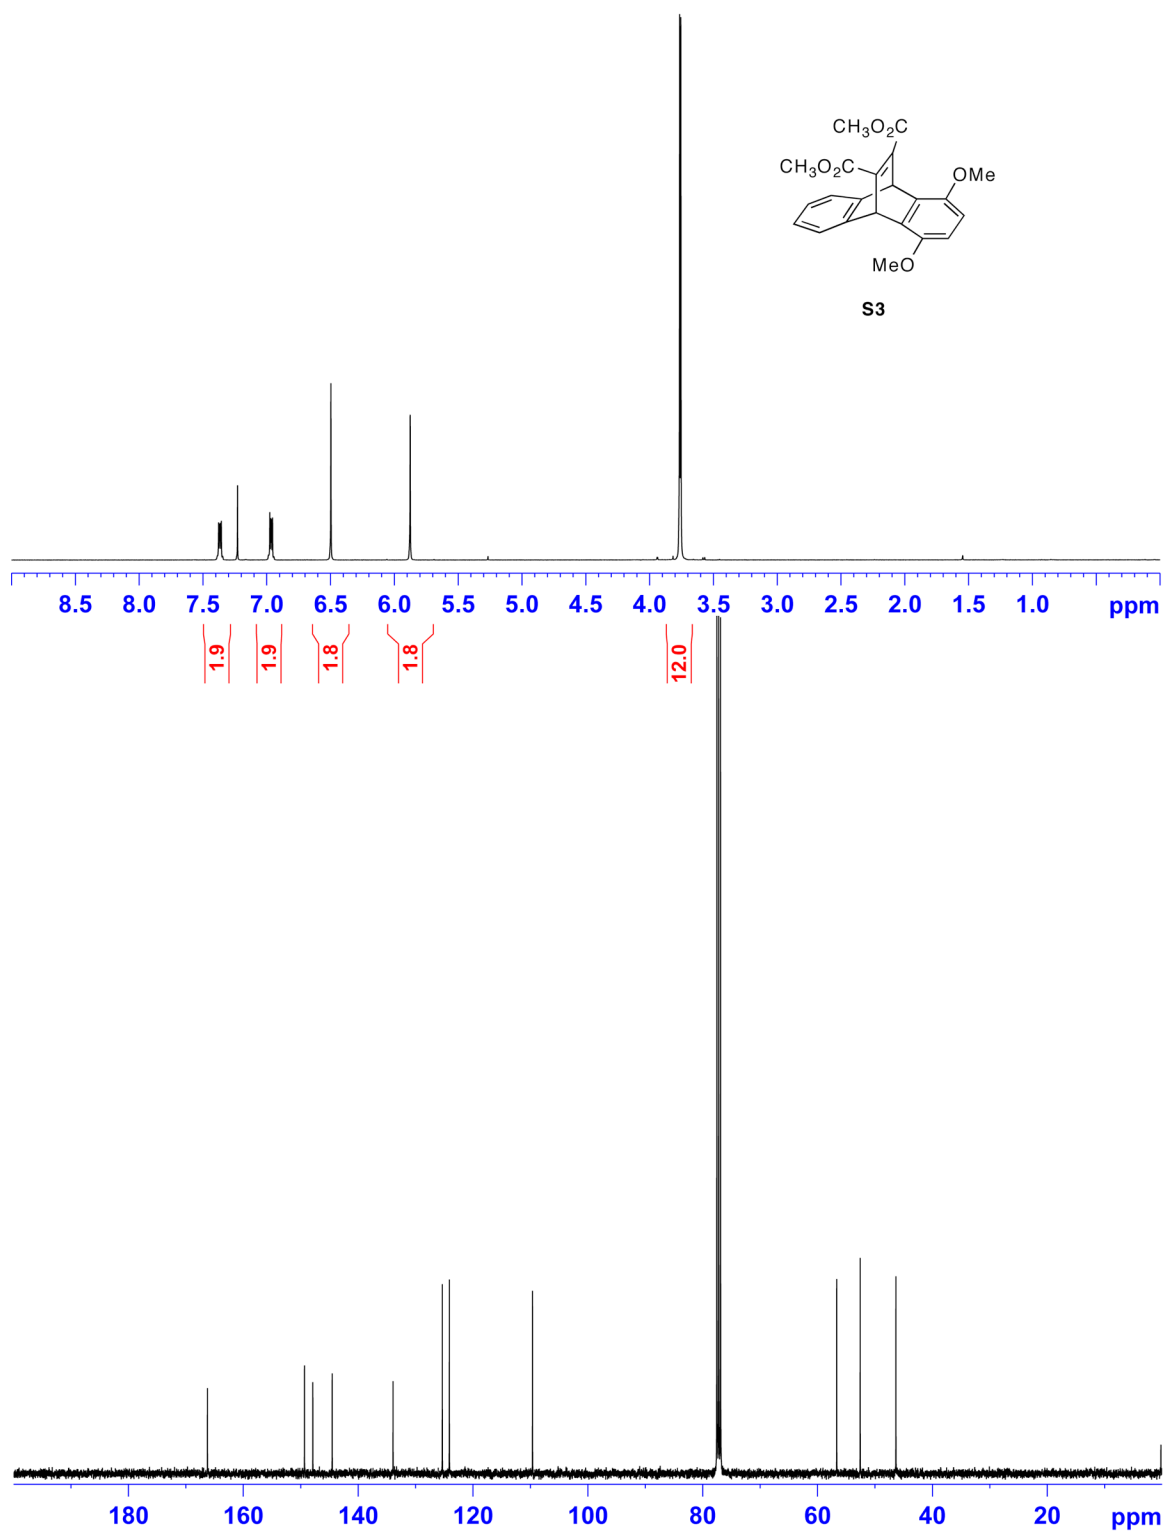

**Figure S10.** <sup>1</sup>H and <sup>13</sup>C NMR spectra of **S3**. <sup>1</sup>H NMR (400 MHz, CDCl<sub>3</sub>) δ 7.37 (m, 2H), 6.96 (m, 2H), 6.50 (s, 2H), 5.88 (s, 2H), 3.76 (s, 6H), 3.75 (s, 6H). <sup>13</sup>C NMR (100 MHz, CDCl<sub>3</sub>) δ 166.23, 149.34, 147.88, 144.50, 133.91, 125.33, 124.11, 109.63, 56.65, 52.56, 46.34.

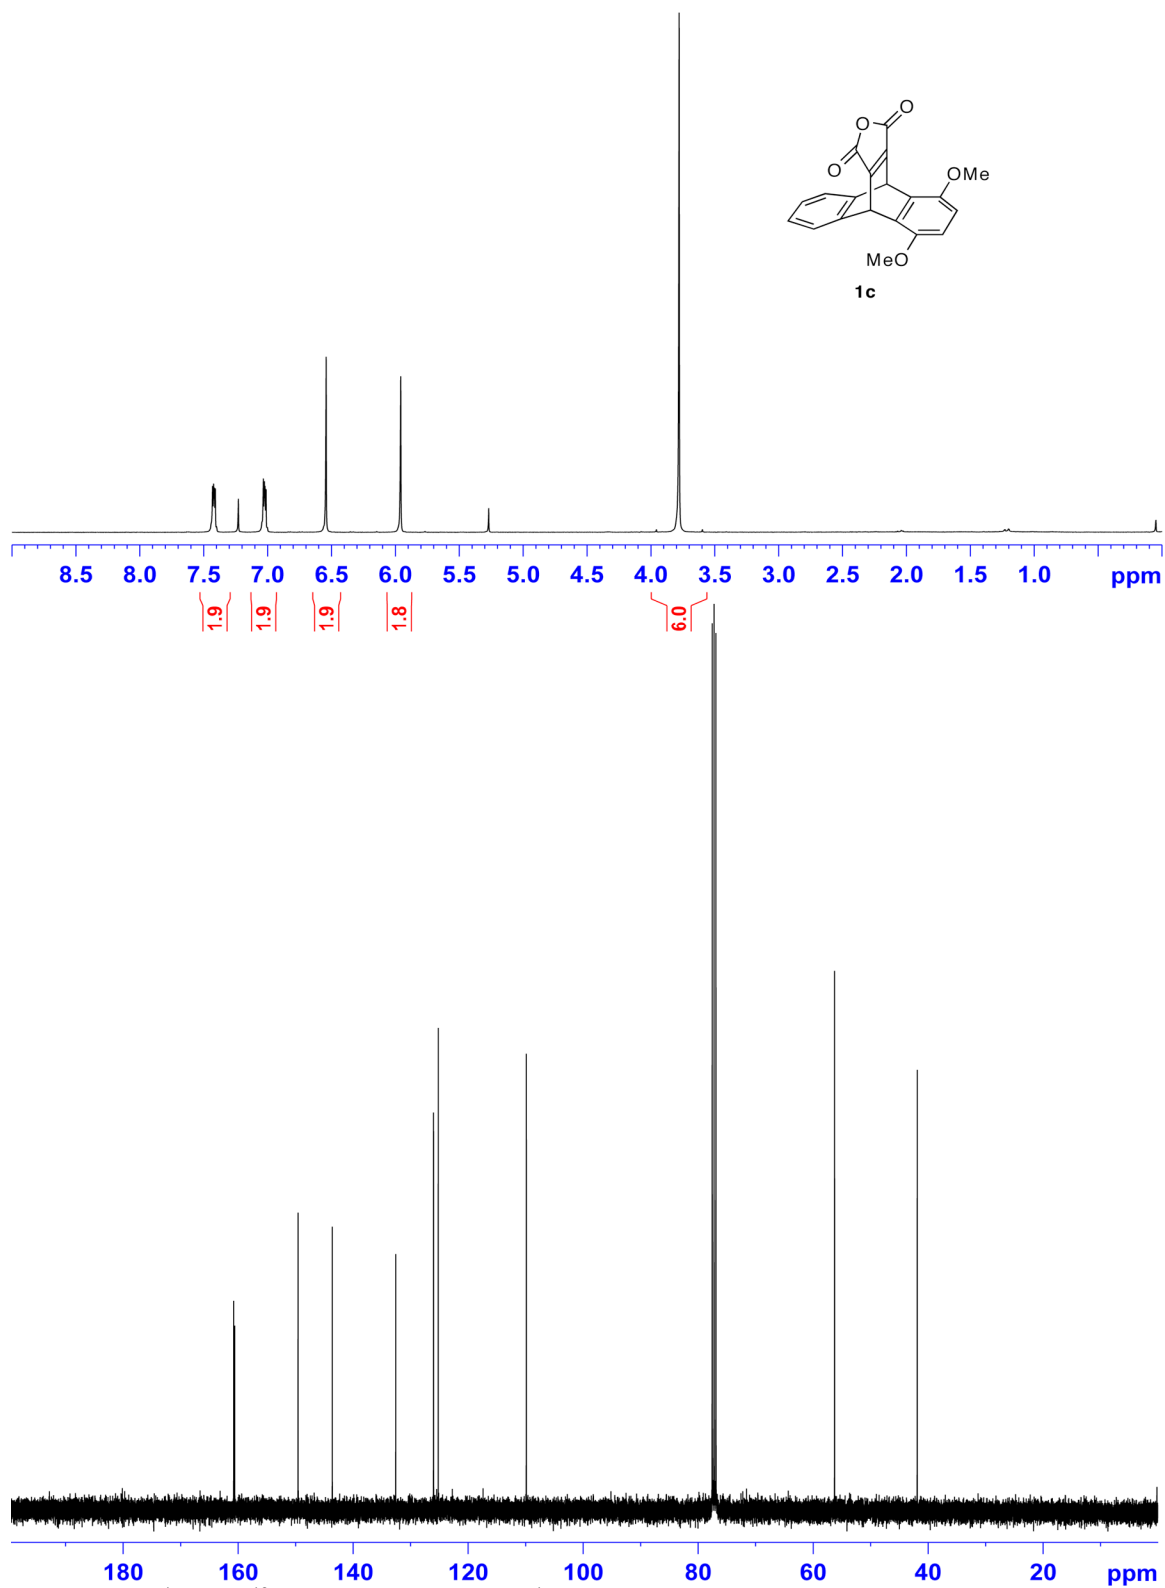

**Figure S11.** <sup>1</sup>H and <sup>13</sup>C NMR spectra of **1c**. <sup>1</sup>H NMR (400 MHz, CDCl<sub>3</sub>) δ 7.42 (m, 2H), 7.02 (m, 2H), 6.54 (s, 2H), 5.96 (s, 2H), 3.78 (s, 6H). <sup>13</sup>C NMR (100 MHz, CDCl<sub>3</sub>) δ 160.77, 160.57, 149.57, 143.61, 132.59, 126.01, 125.19, 109.87, 56.27, 41.88.

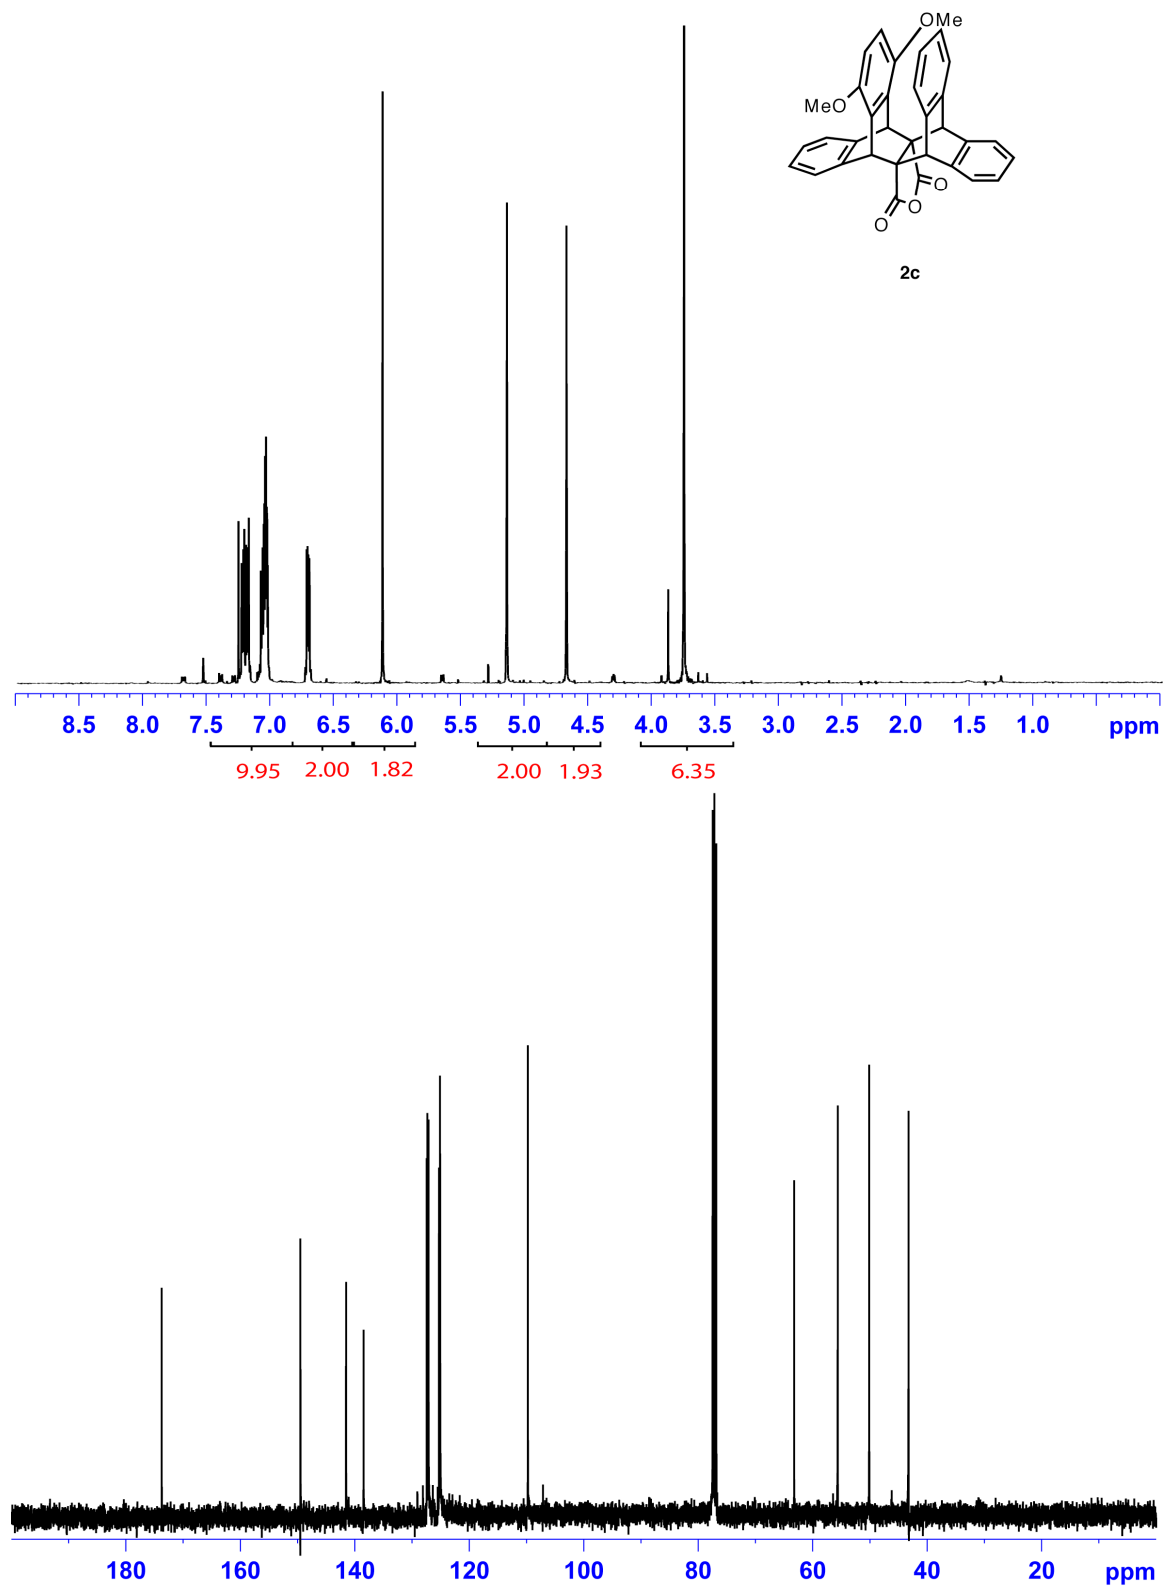

**S12.**  $^1\text{H}$  and  $^{13}\text{C}$  NMR spectra of **2c**.  $^1\text{H}$  NMR (400 MHz,  $\text{CDCl}_3$ )  $\delta$  7.21 (m, 4H), 7.06 (m, 6H), 6.72 (m, 2H), 6.13 (s, 2H), 5.15 (s, 2H), 4.68 (s, 2H), 3.76 (s, 6H).  $^{13}\text{C}$  NMR (100 MHz,  $\text{CDCl}_3$ )  $\delta$  173.80, 149.57, 141.62, 141.59, 138.55, 127.51, 127.47, 127.40, 127.18, 125.37, 125.20, 125.14, 109.83, 63.30, 55.69, 50.19, 43.31.

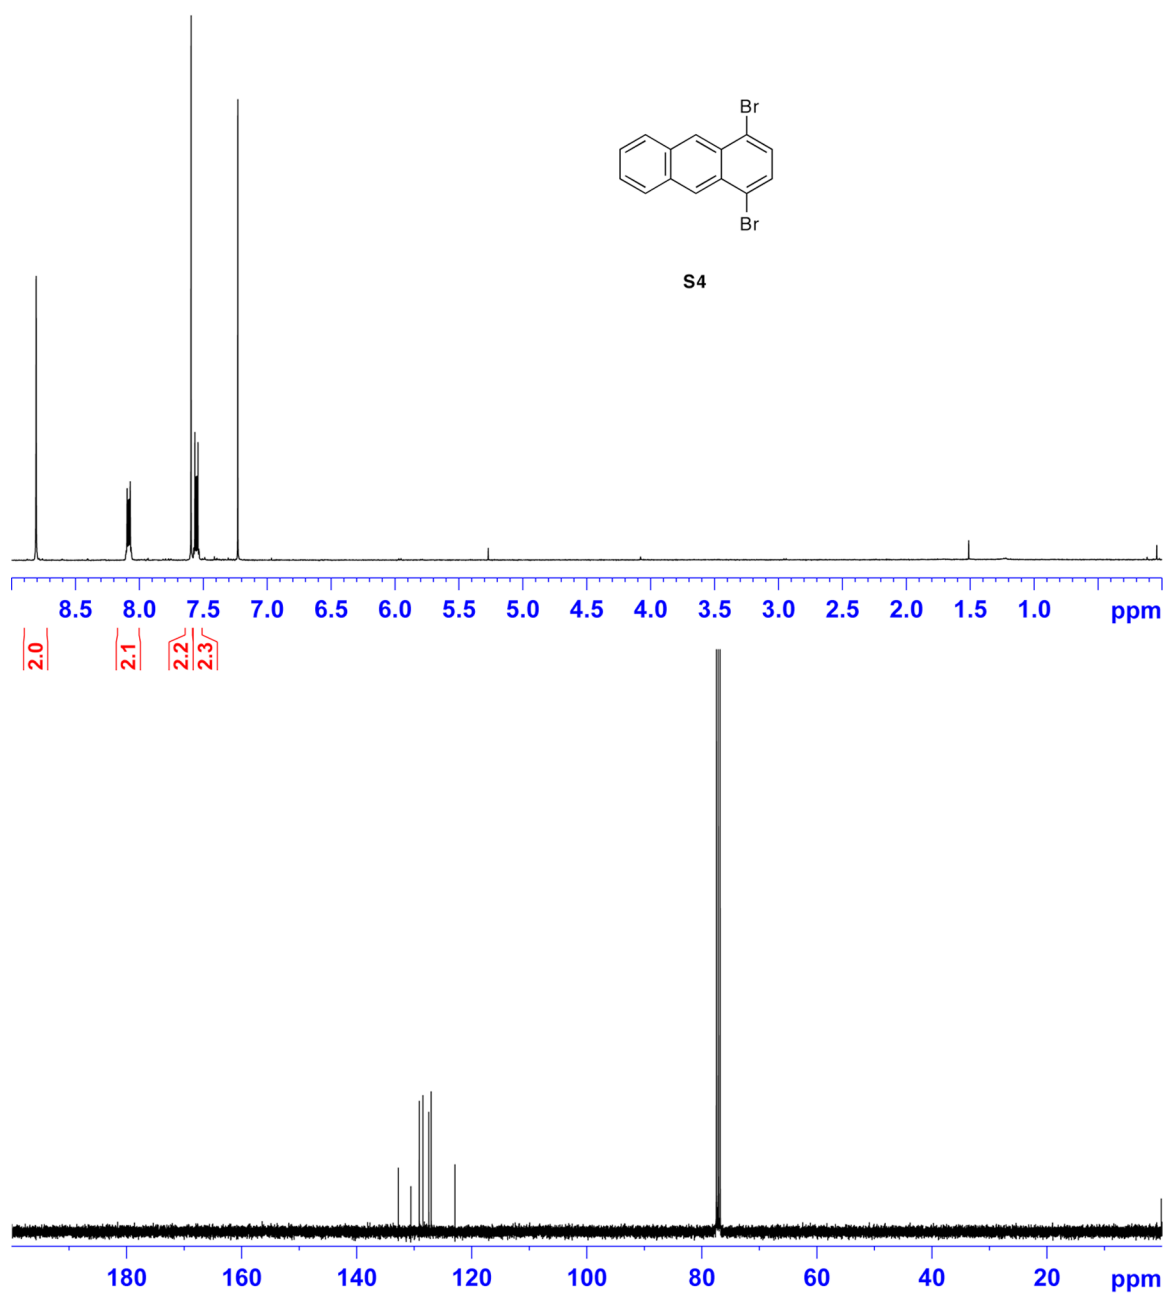

**Figure S13.** <sup>1</sup>H and <sup>13</sup>C NMR spectra of **S4**. <sup>1</sup>H NMR (400 MHz, CDCl<sub>3</sub>) δ 8.81 (s, 2H), 8.08 (m, 2H), 7.59 (s, 2H), 7.55 (m, 2H). <sup>13</sup>C NMR (100 MHz, CDCl<sub>3</sub>) δ 132.80, 130.62, 129.16, 128.53, 127.50, 127.10, 122.94.



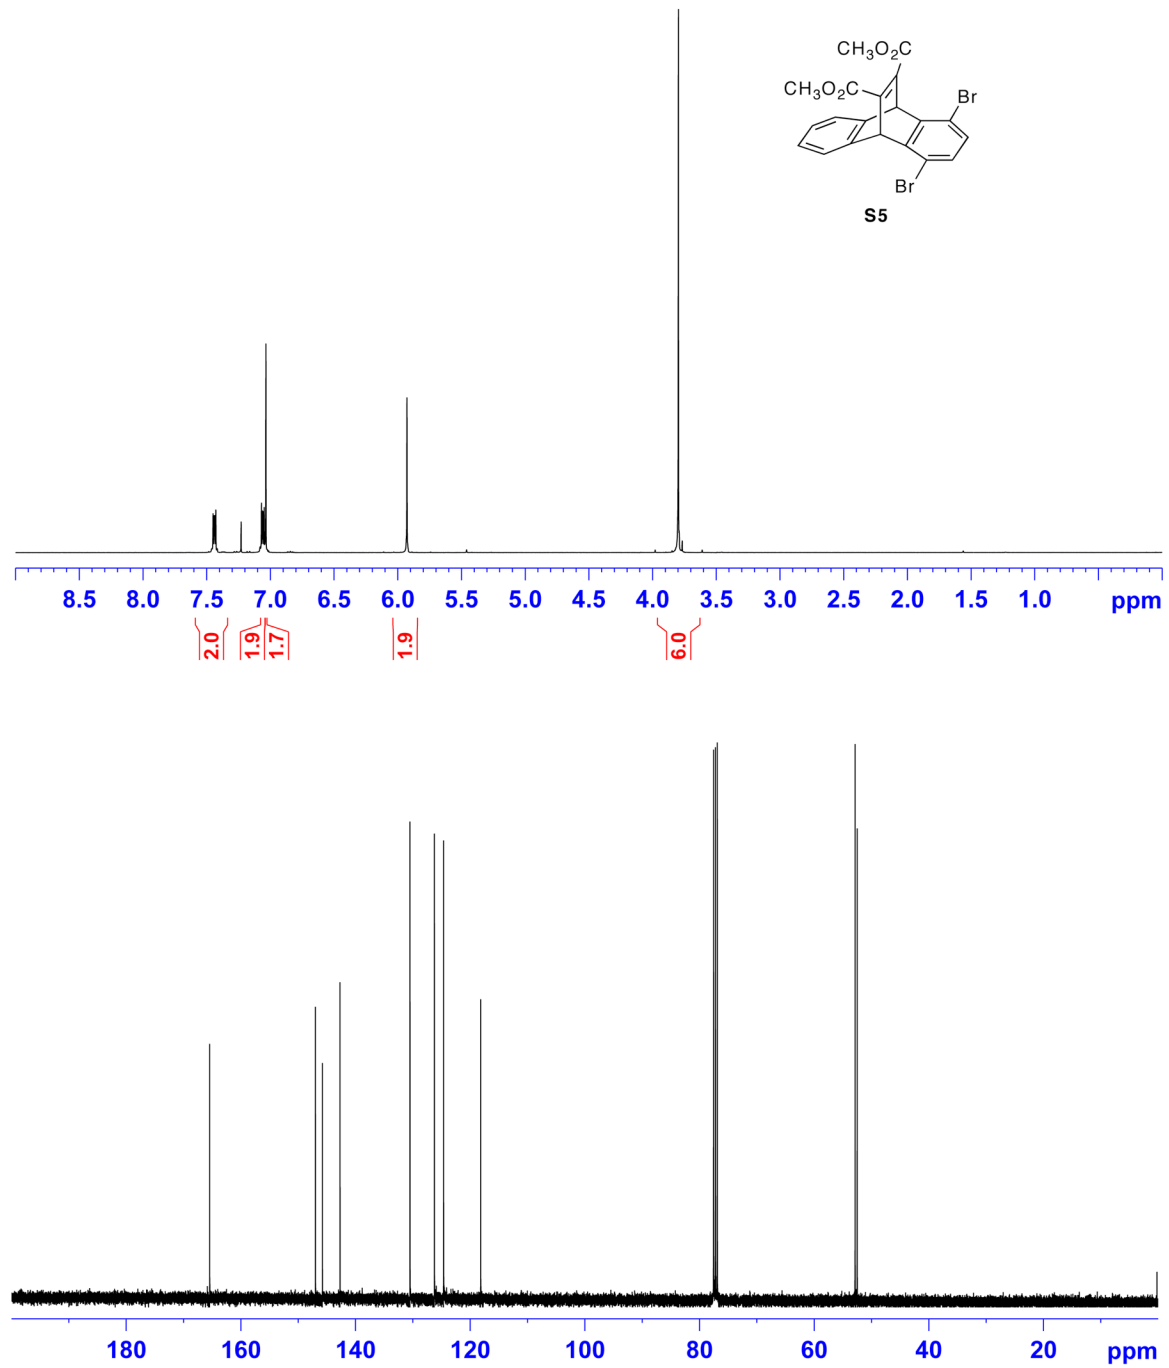

**Figure S14.** <sup>1</sup>H and <sup>13</sup>C NMR spectra of **S5**. <sup>1</sup>H NMR (400 MHz, CDCl<sub>3</sub>) δ 7.44 (m, 2H), 7.06 (m, 2H), 7.03 (s, 2H), 5.93 (s, 2H), 3.80 (s, 6H). <sup>13</sup>C NMR (100 MHz, CDCl<sub>3</sub>) δ 165.43, 146.99, 145.77, 142.70, 130.49, 126.23, 124.63, 118.15, 52.84, 52.49.

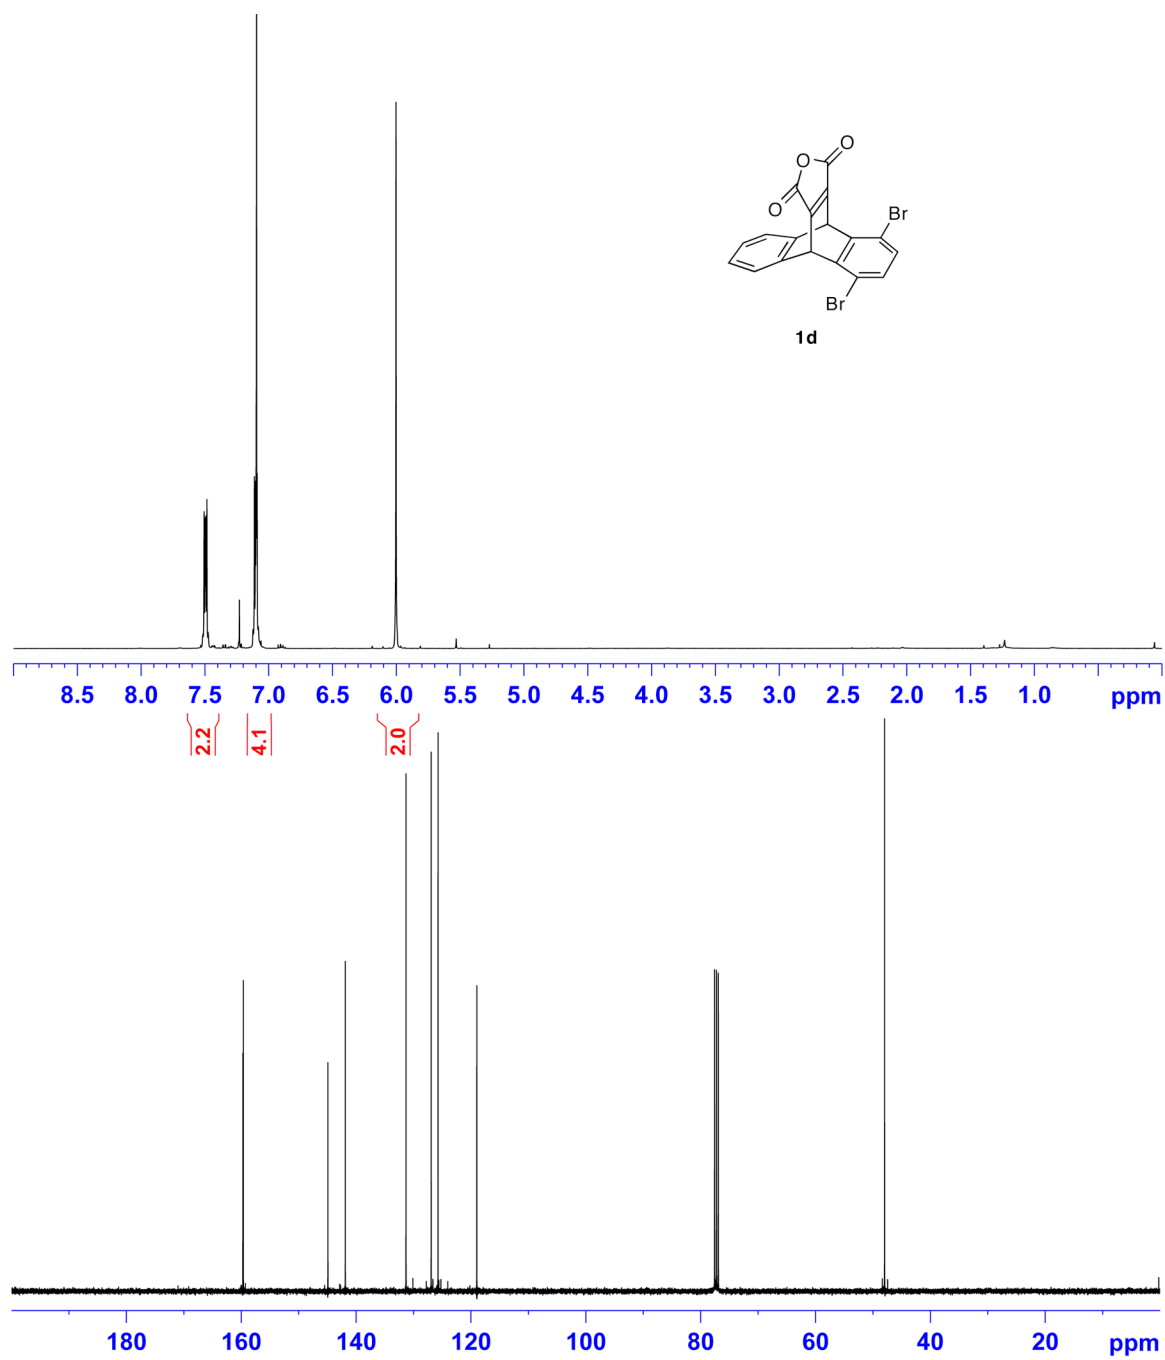

**Figure S15.** <sup>1</sup>H and <sup>13</sup>C NMR spectra of **1d**. <sup>1</sup>H NMR (400 MHz, CDCl<sub>3</sub>) δ 7.49 (m, 2H), 7.10 (m, 2H), 7.09 (s, 2H), 6.00 (s, 2H). <sup>13</sup>C NMR (100 MHz, CDCl<sub>3</sub>) δ 159.71, 159.63, 144.90, 141.88, 131.31, 126.92, 125.72, 118.97, 47.97.

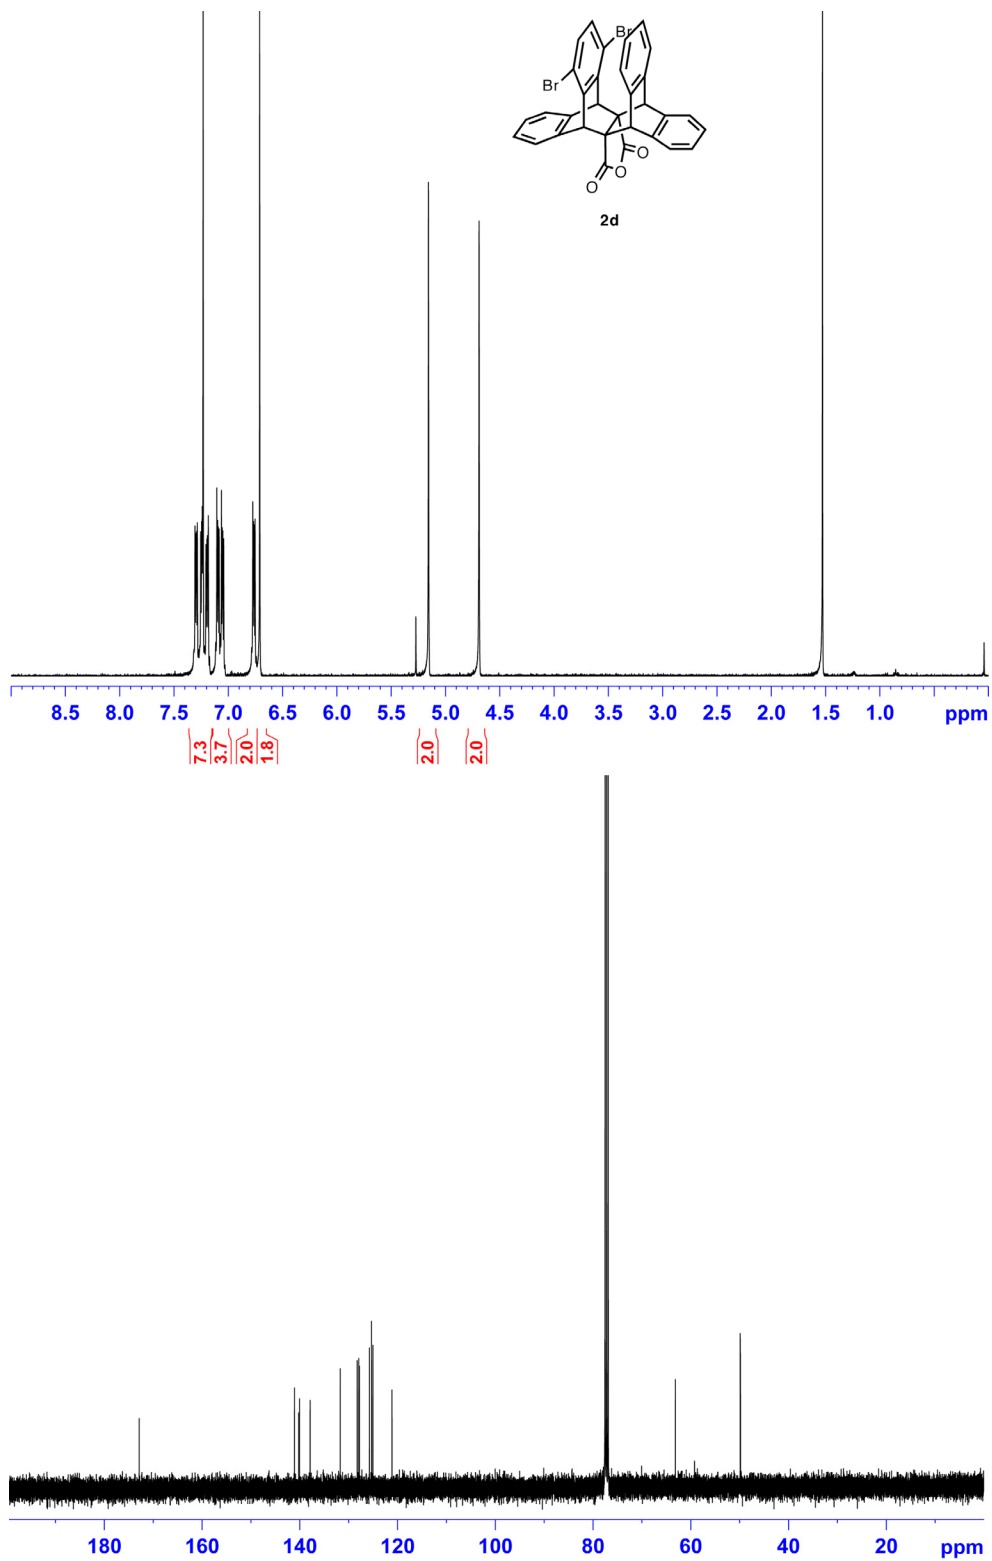

**Figure S16.**  $^1\text{H}$  and  $^{13}\text{C}$  NMR spectra of **2d**.  $^1\text{H}$  NMR (400 MHz,  $\text{CDCl}_3$ )  $\delta$  7.30-7.19 (m, 6H), 7.09-7.05 (m, 4H), 6.76 (m, 2H), 6.71 (s, 2H), 5.16 (s, 2H), 4.69 (s, 2H).  $^{13}\text{C}$  NMR (100 MHz,  $\text{CDCl}_3$ )  $\delta$  172.86, 141.08, 140.22, 140.06, 137.88, 131.73, 128.25, 127.93, 127.81, 125.74, 125.31, 125.02, 121.14, 63.14, 49.89, 49.83.

## X-ray Crystal Structures

---

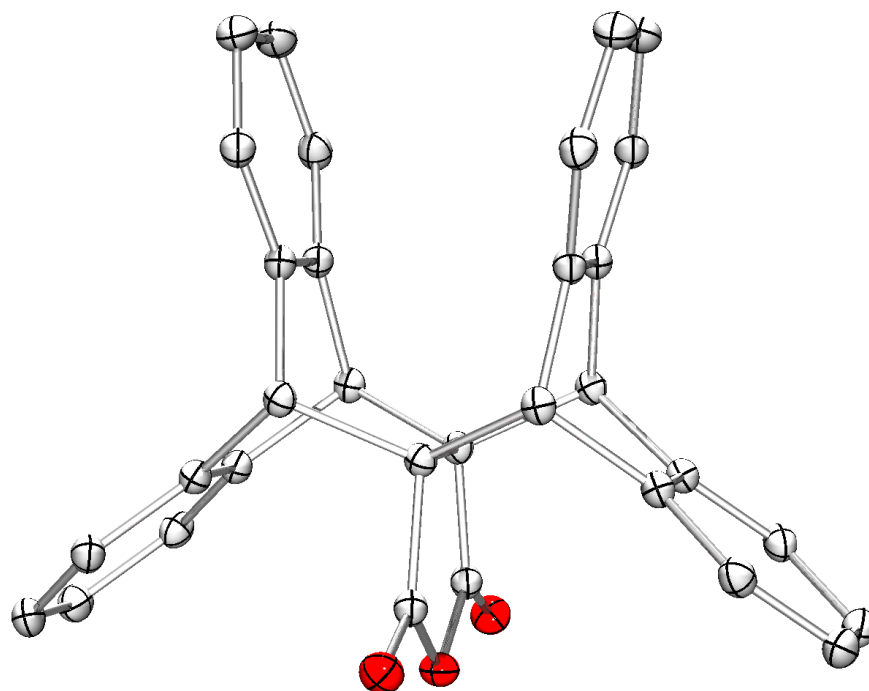

**Figure S17.** Crystal Structure of **2a**.

**Table S2.** Summary of Bond Distances and Angles for **2a**.

|                                   |                  |
|-----------------------------------|------------------|
| centroid distance                 | 3.51 Å           |
| angle between the planes of rings | $22.20 \pm 0.05$ |
| shortest C-C arene-arene distance | 3.048 Å          |
| middle C-C arene-arene distance   | 3.514 Å          |
| longest C-C arene-arene distance  | 3.972 Å          |

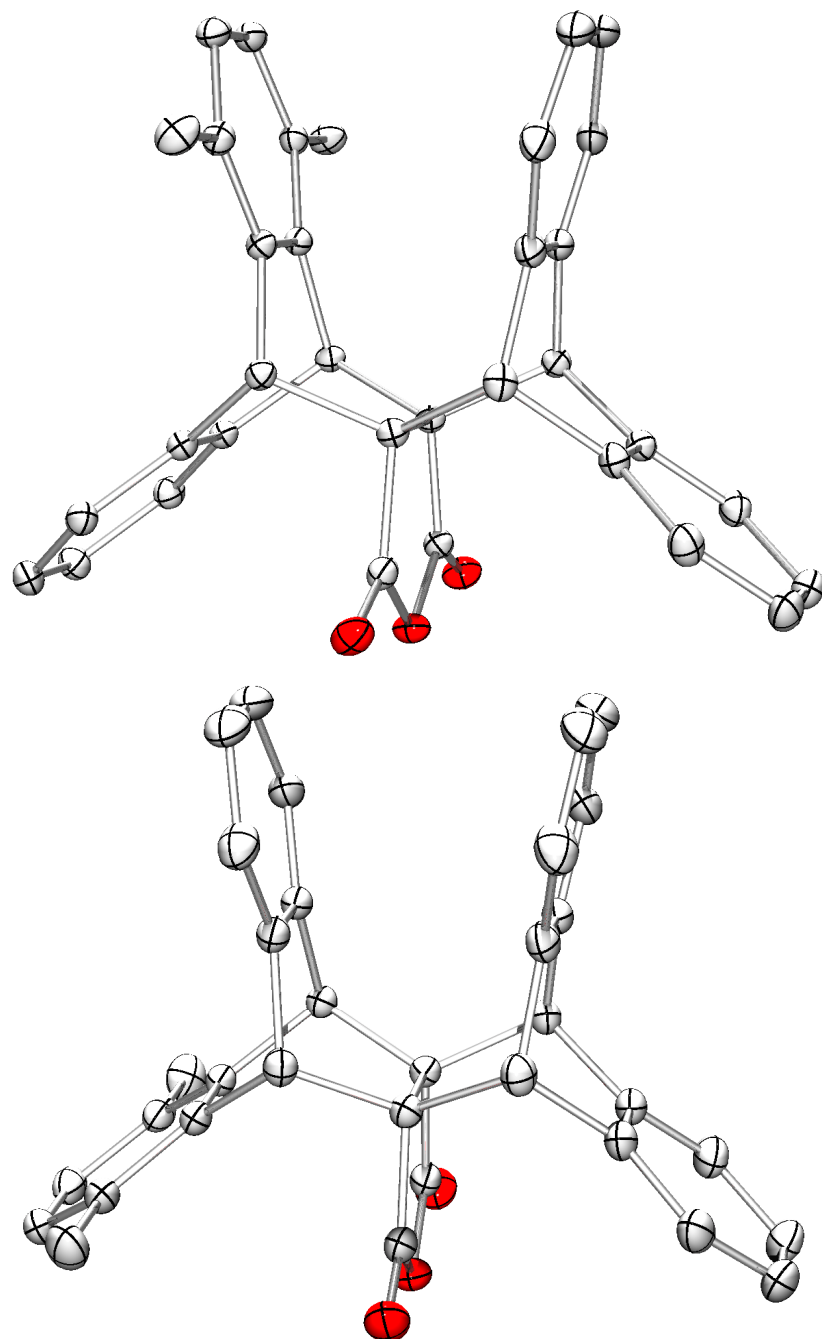

**Figure S18.** Crystal Structures of **2b** (top) and **3b** (bottom).

**Table S3.** Summary of Bond Distances and Angles for **2b** and **3b**.

|                                   | <b>2b</b>    | <b>3b</b>    |
|-----------------------------------|--------------|--------------|
| centroid distance                 | 3.54 Å       | 3.48 Å       |
| angle between the planes of rings | 24.97 ± 0.06 | 21.40 ± 0.05 |
| shortest C-C arene-arene distance | 3.036 Å      | 3.027 Å      |
| middle C-C arene-arene distance   | 3.538 Å      | 3.452 Å      |
| longest C-C arene-arene distance  | 4.074 Å      | 3.913 Å      |

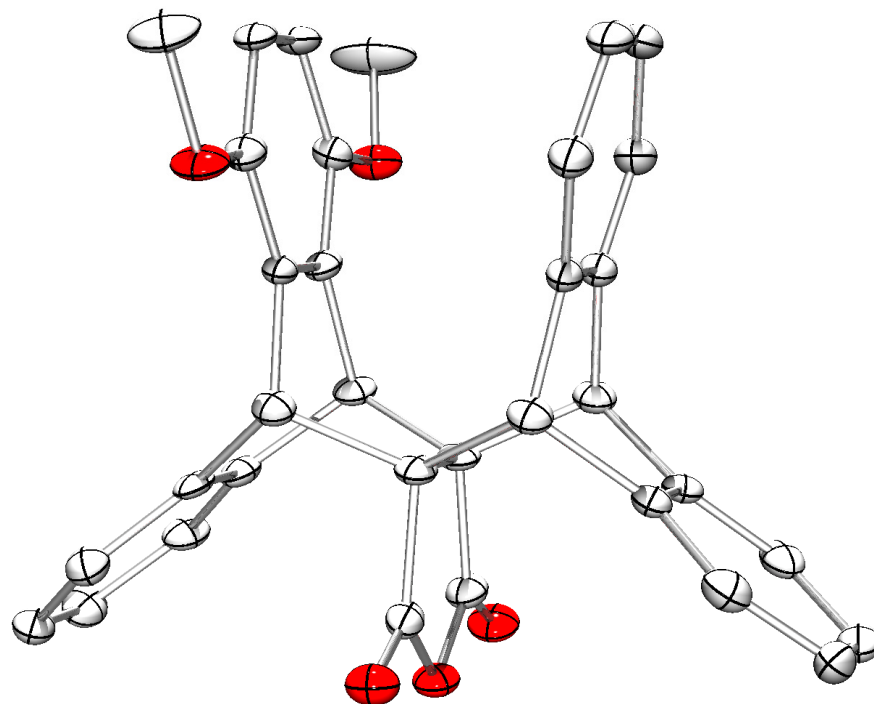

**Figure S19.** Crystal Structure of **2c**.

**Table S4.** Summary of Bond Distances and Angles for **2c**.

|                                   |              |
|-----------------------------------|--------------|
| centroid distance                 | 3.38 Å       |
| angle between the planes of rings | 17.26 ± 0.08 |
| shortest C-C arene-arene distance | 3.023 Å      |
| middle C-C arene-arene distance   | 3.380 Å      |
| longest C-C arene-arene distance  | 3.739 Å      |

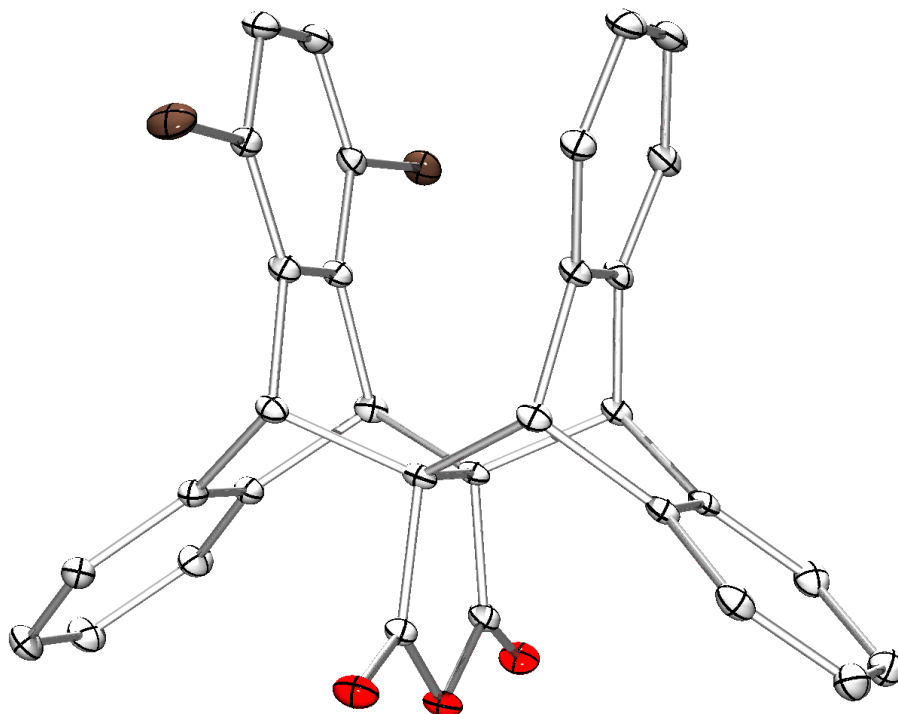

**Figure S20.** Crystal Structure of **2d**.

**Table S5.** Summary of Bond Distances and Angles for **2d**.

|                                   |                  |
|-----------------------------------|------------------|
| centroid distance                 | 3.41 Å           |
| angle between the planes of rings | $18.52 \pm 0.08$ |
| shortest C-C arene-arene distance | 3.022 Å          |
| middle C-C arene-arene distance   | 3.411 Å          |
| longest C-C arene-arene distance  | 3.802 Å          |

## Computational Results

### **Complete citations for Refs. 44 and 48.**

Gaussian 03, Revision E.01, Frisch, M. J.; Trucks, G. W.; Schlegel, H. B.; Scuseria, G. E.; Robb, M. A.; Cheeseman, J. R.; Montgomery, Jr., J. A.; Vreven, T.; Kudin, K. N.; Burant, J. C.; Millam, J. M.; Iyengar, S. S.; Tomasi, J.; Barone, V.; Mennucci, B.; Cossi, M.; Scalmani, G.; Rega, N.; Petersson, G. A.; Nakatsuji, H.; Hada, M.; Ehara, M.; Toyota, K.; Fukuda, R.; Hasegawa, J.; Ishida, M.; Nakajima, T.; Honda, Y.; Kitao, O.; Nakai, H.; Klene, M.; Li, X.; Knox, J. E.; Hratchian, H. P.; Cross, J. B.; Bakken, V.; Adamo, C.; Jaramillo, J.; Gomperts, R.; Stratmann, R. E.; Yazyev, O.; Austin, A. J.; Cammi, R.; Pomelli, C.; Ochterski, J. W.; Ayala, P. Y.; Morokuma, K.; Voth, G. A.; Salvador, P.; Dannenberg, J. J.; Zakrzewski, V. G.; Dapprich, S.; Daniels, A. D.; Strain, M. C.; Farkas, O.; Malick, D. K.; Rabuck, A. D.; Raghavachari, K.; Foresman, J. B.; Ortiz, J. V.; Cui, Q.; Baboul, A. G.; Clifford, S.; Cioslowski, J.; Stefanov, B. B.; Liu, G.; Liashenko, A.; Piskorz, P.; Komaromi, I.; Martin, R. L.; Fox, D. J.; Keith, T.; Al-Laham, M. A.; Peng, C. Y.; Nanayakkara, A.; Challacombe, M.; Gill, P. M. W.; Johnson, B.; Chen, W.; Wong, M. W.; Gonzalez, C.; and Pople, J. A.; Gaussian, Inc., Wallingford CT, 2004.

E. J. Bylaska, W. A. de Jong, N. Govind, K. Kowalski, T. P. Straatsma, M. Valiev, D. Wang, E. Aprà, T. L. Windus, J. Hammond, P. Nichols, S. Hirata, M. T. Hackler, Y. Zhao, P.-D. Fan, R. J. Harrison, M. Dupuis, D. M. A. Smith, J. Nieplocha, V. Tipparaju, M. Krishnan, Q. Wu, T. Van Voorhis, A. A. Auer, M. Nooijen, E. Brown, G. Cisneros, G. I. Fann, H. Fruchtl, J. Garza, K. Hirao, R. Kendall, J. A. Nichols, K. Tsemekhman, K. Wolinski, J. Anchell, D. Bernholdt, P. Borowski, T. Clark, D. Clerc, H. Dachsel, M. Deegan, K. Dyall, D. Elwood, E. Glendening, M. Gutowski, A. Hess, J. Jaffe, B. Johnson, J. Ju, R. Kobayashi, R. Kutteh, Z. Lin, R. Littlefield, X. Long, B. Meng, T. Nakajima, S. Niu, L. Pollack, M. Rosing, G. Sandrone, M. Stave, H. Taylor, G. Thomas, J. van Lenthe, A. Wong, and Z. Zhang, "NWChem, A Computational Chemistry Package for Parallel Computers, Version 5.1" (2007), Pacific Northwest National Laboratory, Richland, Washington 99352-0999, USA.



**Table S6.** DFT and CBS-QB3 computed free energy barriers ( $\Delta G^\ddagger$ , 298 K, kcal mol<sup>-1</sup>) and free energy of reaction ( $\Delta G$ ) for the 1,4-cycloaddition of benzene and maleic anhydride.<sup>a</sup>

|                     | M05-2X | M06-2X | B3LYP | CBS-QB3 |
|---------------------|--------|--------|-------|---------|
| $\Delta G^\ddagger$ | 35.5   | 37.5   | 49.4  | 34.8    |
| $\Delta G$          | 11.0   | 12.4   | 29.8  | 11.6    |

<sup>a</sup> The 6-31+G(d) basis set was used with M05-2X, M06-2X, and B3LYP. M05-2X harmonic vibrational frequencies were used to compute free energy corrections to the M06-2X electronic energies.

**Table S7.** Gas-phase energy barriers [ $\Delta E^\ddagger$ ] and free energy barriers [ $\Delta G^\ddagger$ , 423K)]. All energies given in kcal mol<sup>-1</sup>.

| Product       | M05-2X              |                     | M06-2X              |                     | B3LYP               |                     |
|---------------|---------------------|---------------------|---------------------|---------------------|---------------------|---------------------|
|               | $\Delta E^\ddagger$ | $\Delta G^\ddagger$ | $\Delta E^\ddagger$ | $\Delta G^\ddagger$ | $\Delta E^\ddagger$ | $\Delta G^\ddagger$ |
| H <b>2a</b>   | 12.8                | 32.8                | 12.1                | 32.1                | 35.1                | 54.2                |
| Me <b>2b</b>  | 11.9                | 32.9                | 10.9                | 31.9                | 35.4                | 56.3                |
| Me <b>3b</b>  | 11.9                | 33.0                | 11.2                | 32.3                | 34.7                | 55.0                |
| OMe <b>2c</b> | 10.9                | 29.4                | 10.0                | 28.5                | 34.3                | 55.0                |
| OMe <b>3c</b> | 13.4                | 34.0                | 12.7                | 33.3                | 35.7                | 55.5                |
| Br <b>2d</b>  | 8.6                 | 29.4                | 8.1                 | 28.9                | 32.8                | 53.1                |
| Br <b>3d</b>  | 12.1                | 32.6                | 12.0                | 32.5                | 34.9                | 54.6                |
| Cl <b>2e</b>  | 8.7                 | 29.8                | 7.8                 | 28.9                | 32.6                | 52.9                |
| Cl <b>3e</b>  | 12.0                | 33.0                | 11.3                | 32.3                | 34.8                | 54.9                |
| F <b>2f</b>   | 9.7                 | 29.4                | 9.2                 | 28.8                | 32.4                | 52.5                |
| F <b>3f</b>   | 12.3                | 33.2                | 11.8                | 32.6                | 34.6                | 54.3                |

**Table S8.** Inter-ring distances (Å) between interacting rings in TS2, TS3, and the corresponding disubstituted gas-phase dimer, evaluated at the M05-2X/6-31+G(d) or M05-2X/AVDZ' level of theory.

| Substrate     | TS2   |      |           | TS3   |      |           |
|---------------|-------|------|-----------|-------|------|-----------|
|               | short | long | gas phase | short | long | gas phase |
| Me <b>1b</b>  | 3.23  | 3.49 | 3.90      | 3.26  | 3.54 | 4.05      |
| OMe <b>1c</b> | 3.23  | 3.42 | 3.85      | 3.24  | 3.53 | 4.05      |
| Br <b>1d</b>  | 3.24  | 3.45 | 3.65      | 3.26  | 3.52 | 4.05      |
| Cl <b>1e</b>  | 3.23  | 3.43 | 3.80      | 3.25  | 3.51 | 4.05      |
| F <b>1f</b>   | 3.23  | 3.44 | 3.85      | 3.24  | 3.53 | 4.05      |

**Scheme S1.** Reactions of 1,3-butadiene + Substrates 1a – 1f.

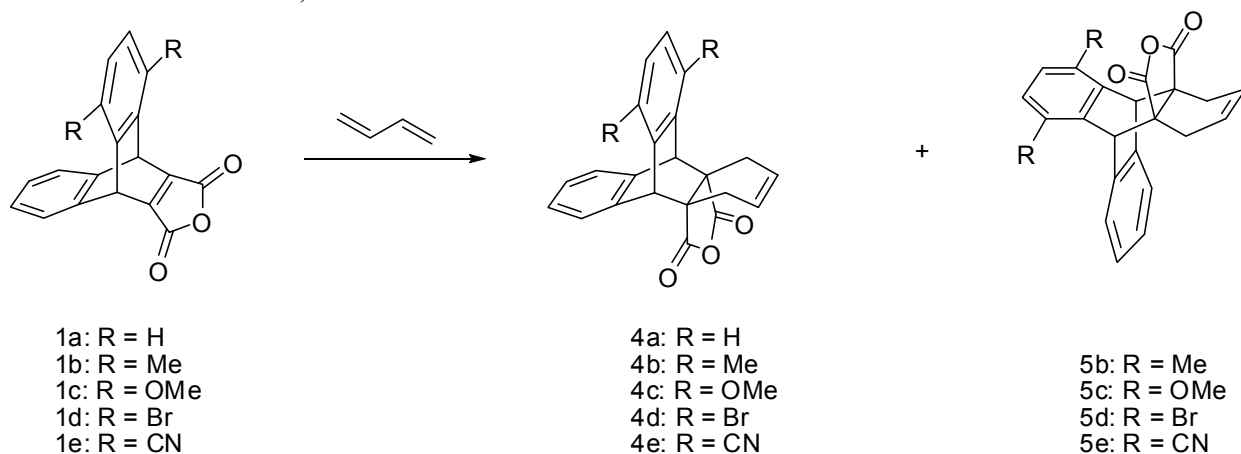

**Table S9.** M05-2X/6-31+G(d) predicted energy barriers ( $\Delta E^\ddagger$ , kcal mol<sup>-1</sup>) and relative energy barriers [ $\Delta\Delta E_{\text{sub}} = \Delta E^\ddagger(\text{TS5}) - \Delta E^\ddagger(\text{TS4})$ ] for the addition of butadiene to substrates **1a-1e**.

| Product |           | $\Delta E^\ddagger$ | $\Delta\Delta E_{\text{sub}}$ |
|---------|-----------|---------------------|-------------------------------|
| H       | <b>4a</b> | 5.6                 |                               |
| Me      | <b>4b</b> | 5.2                 |                               |
| Me      | <b>5b</b> | 5.3                 | 0.1                           |
| OMe     | <b>4c</b> | 5.0                 |                               |
| OMe     | <b>5c</b> | 6.0                 | 1.0                           |
| Br      | <b>4d</b> | 5.6                 |                               |
| Br      | <b>5d</b> | 6.5                 | 0.9                           |
| Cl      | <b>4e</b> | 4.6                 |                               |
| Cl      | <b>5e</b> | 5.4                 | 0.8                           |
| F       | <b>4f</b> | 5.1                 |                               |
| F       | <b>5f</b> | 5.4                 | 0.3                           |

**Table S10.** M05-2X and M06-2X energies (in hartree) for substituted benzene dimers.

|     | M05-2X/6-31+G(d) |              | M06-2X/6-31+G(d) |              |
|-----|------------------|--------------|------------------|--------------|
|     | Dimer            | Monomer      | Dimer            | Monomer      |
| H   | -464.449702      | -232.224432  | -464.290572      | -232.144460  |
| Me  | -503.760953      | -271.535226  | -503.588178      | -271.441474  |
| OH  | -539.664749      | -307.438898  | -539.488518      | -307.341650  |
| OMe | -578.961134      | -346.735326  | -578.772553      | -346.625497  |
| Cl  | -924.027009      | -691.800414  | -923.862522      | -691.714788  |
| F   | -563.686969      | -331.460889  | -563.504871      | -331.357742  |
| CN  | -556.692380      | -324.465127  | -556.510747      | -324.362366  |
|     | M05-2X/AVDZ'     |              | M06-2X/ AVDZ'    |              |
| H   | -464.489655      | -232.244271  | -464.338359      | -232.167882  |
| Br  | -3037.983350     | -2805.736364 | -3037.924961     | -2805.752725 |

**Table S11.** B3LYP energies in hartree.

| Substrate  | Reactant  | TS2          | TS3          | Product2     | Product3     |
|------------|-----------|--------------|--------------|--------------|--------------|
| H          | <b>1a</b> | -917.639447  | -1457.132287 | -1457.201169 |              |
| Me         | <b>1b</b> | -996.274522  | -1535.766868 | -1535.835592 | -1535.837017 |
| OMe        | <b>1c</b> | -1146.689844 | -1686.183982 | -1686.181704 | -1686.251026 |
| Br         | <b>1d</b> | -6064.799655 | -6604.318468 | -6604.315094 | -6604.376849 |
| Cl         | <b>1e</b> | -1836.826150 | -2376.322966 | -2376.319424 | -2376.391917 |
| F          | <b>1f</b> | -1116.118104 | -1655.615224 | -1655.611712 | -1655.683822 |
| Anthracene |           | -539.548722  |              |              | -1655.680400 |

**Table S12.** B3LYP enthalpies (0 K) in hartree.

| Substrate  | Reactant  | TS2          | TS3          | Product2     | Product3     |
|------------|-----------|--------------|--------------|--------------|--------------|
| H          | <b>1a</b> | -917.407648  | -1456.705894 | -1456.770427 |              |
| Me         | <b>1b</b> | -995.987356  | -1535.284737 | -1535.285918 | -1535.350675 |
| OMe        | <b>1c</b> | -1146.392754 | -1685.692093 | -1685.690099 | -1685.756905 |
| Br         | <b>1d</b> | -6064.588891 | -6603.913754 | -6603.910438 | -6603.967968 |
| Cl         | <b>1e</b> | -1836.613614 | -2375.915694 | -2375.912218 | -2375.980118 |
| F          | <b>1f</b> | -1115.902733 | -1655.205080 | -1655.201723 | -1655.269320 |
| Anthracene |           | -539.354531  |              |              | -1655.265977 |

**Table S13.** B3LYP enthalpies (423 K) in hartree.

| Substrate  | Reactant  | TS2         | TS3          | Product2    | Product3     |
|------------|-----------|-------------|--------------|-------------|--------------|
| H          | <b>1a</b> | -917.377771 | -1456.65514  | -1456.72069 |              |
| Me         | <b>1b</b> | -995.951249 | -1535.22798  | -1535.22909 | -1535.29354  |
| OMe        | <b>1c</b> | -1146.35332 | -1685.6319   | -1685.62978 | -1685.69763  |
| Br         | <b>1d</b> | -6064.55418 | -6603.858122 | -6603.85477 | -6603.912597 |
| Cl         | <b>1e</b> | -1836.57962 | -2375.86082  | -2375.85736 | -2375.92631  |
| F          | <b>1f</b> | -1115.86983 | -1655.15133  | -1655.14794 | -1655.21657  |
| Anthracene |           | -539.33376  |              |             | -1655.21324  |

**Table S14.** B3LYP free energies (423 K) in hartree.

| Substrate  | Reactant  | TS2         | TS3          | Product2    | Product3     |
|------------|-----------|-------------|--------------|-------------|--------------|
| H          | <b>1a</b> | -917.474319 | -1456.7961   | -1456.85737 |              |
| Me         | <b>1b</b> | -996.062709 | -1535.38106  | -1535.38316 | -1535.44366  |
| OMe        | <b>1c</b> | -1146.47315 | -1685.79367  | -1685.79285 | -1685.8563   |
| Br         | <b>1d</b> | -6064.66681 | -6604.013075 | -6604.01072 | -6604.066212 |
| Cl         | <b>1e</b> | -1836.68838 | -2376.01223  | -2376.00905 | -2376.07375  |
| F          | <b>1f</b> | -1115.97474 | -1655.29916  | -1655.29626 | -1655.36048  |
| Anthracene |           | -539.40813  |              |             | -1655.35715  |

**Table S15.** B3LYP/6-31+G(d) CPCM-corrected free energies (423 K) in hartree.

| Substrate  | Reactant  | TS2          | TS3          |
|------------|-----------|--------------|--------------|
| H          | <b>1a</b> | -917.480918  | -1456.799078 |
| Me         | <b>1b</b> | -996.067282  | -1535.382254 |
| OMe        | <b>1c</b> | -1146.478963 | -1685.793214 |
| Br         | <b>1d</b> | -6064.670770 | -6604.010630 |
| Cl         | <b>1e</b> | -1836.692402 | -2376.009944 |
| F          | <b>1f</b> | -1115.980176 | -1655.298648 |
| Anthracene |           | -539.411413  | -1655.297496 |

**Table S16.** M05-2X energies in hartree.

| Substrate  | Reactant  | TS2          | TS3          | Product2     | Product3     |
|------------|-----------|--------------|--------------|--------------|--------------|
| H          | <b>1a</b> | -917.562544  | -1457.033268 | -1457.120125 |              |
| Me         | <b>1b</b> | -996.184754  | -1535.656946 | -1535.656881 | -1535.744488 |
| OMe        | <b>1c</b> | -1146.582639 | -1686.056403 | -1686.052330 | -1686.143500 |
| Br         | <b>1d</b> | -6064.622264 | -6604.141453 | -6604.135857 | -6604.211376 |
| Cl         | <b>1e</b> | -1836.710422 | -2376.187642 | -2376.182365 | -2376.274469 |
| F          | <b>1f</b> | -1116.029411 | -1655.504971 | -1655.500827 | -1655.591757 |
| Anthracene |           | -539.491078  |              |              | -1655.587292 |

**Table S17.** M05-2X enthalpies (0 K) in hartree.

| Substrate  | Reactant  | TS2          | TS3          | Product2     | Product3     |
|------------|-----------|--------------|--------------|--------------|--------------|
| H          | <b>1a</b> | -917.325908  | -1456.598484 | -1456.680678 |              |
| Me         | <b>1b</b> | -995.891773  | -1535.165721 | -1535.165546 | -1535.248520 |
| OMe        | <b>1c</b> | -1146.279073 | -1685.554565 | -1685.550584 | -1685.634084 |
| Br         | <b>1d</b> | -6064.406925 | -6603.728569 | -6603.723152 | -6603.796840 |
| Cl         | <b>1e</b> | -1836.493260 | -2375.772046 | -2375.766919 | -2375.854224 |
| F          | <b>1f</b> | -1115.809260 | -1655.086401 | -1655.082406 | -1655.168785 |
| Anthracene |           | -539.296887  |              |              | -1655.164379 |

**Table S18.** M05-2X enthalpies (298 K) in hartree.

| Substrate  | Reactant  | TS2          | TS3          | Product2     | Product3     |
|------------|-----------|--------------|--------------|--------------|--------------|
| H          | <b>1a</b> | -917.296509  | -1456.548631 | -1456.631832 |              |
| Me         | <b>1b</b> | -995.856343  | -1535.109904 | -1535.192896 | -1535.19376  |
| OMe        | <b>1c</b> | -1146.240344 | -1685.495426 | -1685.491377 | -1685.575756 |
| Br         | <b>1d</b> | -6064.372773 | -6603.673891 | -6603.668430 | -6603.742589 |
| Cl         | <b>1e</b> | -1836.459812 | -2375.718196 | -2375.713035 | -2375.801358 |
| F          | <b>1f</b> | -1115.776901 | -1655.033625 | -1655.029621 | -1655.116903 |
| Anthracene |           |              |              |              | -1655.112537 |

**Table S19.** M05-2X free energies (423 K) in hartree.

| Substrate  | Reactant  | TS2          | TS3          | Product2     | Product3     |
|------------|-----------|--------------|--------------|--------------|--------------|
| H          | <b>1a</b> | -917.392346  | -1456.687348 | -1456.766339 |              |
| Me         | <b>1b</b> | -995.96623   | -1535.261168 | -1535.26098  | -1535.341614 |
| OMe        | <b>1c</b> | -1146.358794 | -1685.65931  | -1685.65194  | -1685.733901 |
| Br         | <b>1d</b> | -6064.484379 | -6603.827137 | -6603.822079 | -6603.892224 |
| Cl         | <b>1e</b> | -1836.567612 | -2375.867491 | -2375.862412 | -2375.947409 |
| F          | <b>1f</b> | -1115.880872 | -1655.181402 | -1655.175246 | -1655.259968 |
| Anthracene |           | -539.34734   |              |              | -1655.255415 |

**Table S20.** M05-2X CPCM-corrected free energies (423 K) in hartree.

| Substrate  | Reactant  | TS2          | TS3          |
|------------|-----------|--------------|--------------|
| H          | <b>1a</b> | -917.399281  | -1456.691647 |
| Me         | <b>1b</b> | -995.970561  | -1535.265114 |
| OMe        | <b>1c</b> | -1146.365212 | -1685.659197 |
| Br         | <b>1d</b> | -6064.503950 | -6603.854269 |
| Cl         | <b>1e</b> | -1836.587960 | -2375.895782 |
| F          | <b>1f</b> | -1115.887624 | -1655.184212 |
| Anthracene |           | -539.353055  |              |

**Table S21.** M06-2X energies in hartree.

| Substrate  | Reactant  | TS2          | TS3          |
|------------|-----------|--------------|--------------|
| H          | <b>1a</b> | -917.278460  | -1456.567454 |
| Me         | <b>1b</b> | -995.873226  | -1535.164067 |
| OMe        | <b>1c</b> | -1146.238832 | -1685.531134 |
| Br         | <b>1d</b> | -6064.549319 | -6603.898355 |
| Cl         | <b>1e</b> | -1836.415459 | -2375.711263 |
| F          | <b>1f</b> | -1115.699277 | -1654.992907 |
| Anthracene |           | -539.308234  |              |

**Table S22.** M05-2X energies (in hartree) for the “truncated” stacked structures depicted in Fig. 3. “TS2” corresponds to the stacked geometry present in TS2, *etc.*

| Substrate     | TS2          | Benzene1     | Benzene2    | TS3         | Benzene1    | Benzene2    |
|---------------|--------------|--------------|-------------|-------------|-------------|-------------|
| Me <b>1b</b>  | -543.066051  | -310.845535  | -232.222450 | -464.443944 | -232.224249 | -232.222337 |
| OMe <b>1c</b> | -693.464749  | -461.243278  | -232.222296 | -464.443640 | -232.224215 | -232.222343 |
| Br <b>1d</b>  | -5611.470898 | -5379.226205 | -232.242182 | -464.484110 | -232.244026 | -232.242160 |
| Cl <b>1e</b>  | -1383.598080 | -1151.374525 | -232.222390 | -464.443658 | -232.224207 | -232.222305 |
| F <b>1f</b>   | -662.916561  | -430.694688  | -232.222300 | -464.443626 | -232.224213 | -232.222368 |

**Table S23.** M05-2X energies (in hartree) for the “truncated” structures depicted in Fig. 4.

| <b>Substrate</b> | <b>TS2</b>  | <b>TS3</b>  |
|------------------|-------------|-------------|
| Me <b>1b</b>     | -996.058268 | -996.058237 |
| OMe <b>1c</b>    | -996.060570 | -996.037701 |
| Br <b>1d</b>     | -996.167805 | -996.166452 |
| Cl <b>1e</b>     | -996.058602 | -996.057471 |
| F <b>1f</b>      | -996.059135 | -996.057634 |

## Optimized Geometries

### B3LYP optimized Cartesian Coordinates

#### Maleic Anhydride + Benzene

12

Benzene B3LYP/6-31+G(d) Optimized Geometry

|   |            |            |           |
|---|------------|------------|-----------|
| C | 0.0000000  | 1.3985480  | 0.0000000 |
| C | 1.2111780  | 0.6992740  | 0.0000000 |
| C | 1.2111780  | -0.6992740 | 0.0000000 |
| C | 0.0000000  | -1.3985480 | 0.0000000 |
| C | -1.2111780 | -0.6992740 | 0.0000000 |
| C | -1.2111780 | 0.6992740  | 0.0000000 |
| H | 0.0000000  | 2.4858300  | 0.0000000 |
| H | 2.1527920  | 1.2429150  | 0.0000000 |
| H | 2.1527920  | -1.2429150 | 0.0000000 |
| H | 0.0000000  | -2.4858300 | 0.0000000 |
| H | -2.1527920 | -1.2429150 | 0.0000000 |
| H | -2.1527920 | 1.2429150  | 0.0000000 |

9

maleic anhydride B3LYP/6-31+G(d) Optimized Geometry

|   |           |            |            |
|---|-----------|------------|------------|
| C | 0.0000000 | 0.6686910  | -1.2588150 |
| C | 0.0000000 | -0.6686910 | -1.2588150 |
| C | 0.0000000 | 1.1319620  | 0.1581990  |
| H | 0.0000000 | 1.3620940  | -2.0903670 |
| H | 0.0000000 | -1.3620940 | -2.0903670 |
| O | 0.0000000 | 0.0000000  | 0.9723990  |
| O | 0.0000000 | 2.2462550  | 0.6005590  |
| C | 0.0000000 | -1.1319620 | 0.1581990  |
| O | 0.0000000 | -2.2462550 | 0.6005590  |

21

cycloadduct B3LYP/6-31+G(d) Optimized Geometry

|   |            |            |            |
|---|------------|------------|------------|
| C | -0.5961580 | 2.3774650  | 0.6688290  |
| H | -1.0470330 | 3.1462010  | -1.2895340 |
| H | -1.0470330 | 3.1462010  | 1.2895340  |
| C | -0.5961580 | 2.3774650  | -0.6688290 |
| C | 1.4555890  | 0.9878580  | 0.6690400  |
| H | 2.3347740  | 0.8407420  | 1.2889350  |
| C | 0.0745590  | 1.1570210  | 1.2884080  |
| H | 2.3347740  | 0.8407420  | -1.2889350 |
| C | -0.7854810 | -0.0670660 | -0.7685760 |
| C | -0.7854810 | -0.0670660 | 0.7685760  |

|   |            |            |            |
|---|------------|------------|------------|
| C | 1.4555890  | 0.9878580  | -0.6690400 |
| C | 0.0745590  | 1.1570210  | -1.2884080 |
| C | -0.1865420 | -1.4115140 | -1.1490740 |
| H | 0.0903710  | 1.1722960  | -2.3791630 |
| H | 0.0903710  | 1.1722960  | 2.3791630  |
| H | -1.7894660 | -0.0065500 | 1.1993680  |
| C | -0.1865420 | -1.4115140 | 1.1490740  |
| H | -1.7894660 | -0.0065500 | -1.1993680 |
| O | 0.0187350  | -1.8603290 | -2.2418940 |
| O | 0.1224180  | -2.1331610 | 0.0000000  |
| O | 0.0187350  | -1.8603290 | 2.2418940  |

21

transition state B3LYP/6-31+G(d) Optimized Geometry

|   |            |            |            |
|---|------------|------------|------------|
| C | -0.5820540 | 2.3802490  | 0.6797410  |
| H | -1.2290620 | 3.0261290  | -1.2668690 |
| H | -1.2290620 | 3.0261290  | 1.2668690  |
| C | -0.5820540 | 2.3802490  | -0.6797410 |
| C | 1.4437710  | 0.9785600  | 0.6803540  |
| H | 2.2712260  | 0.5882240  | 1.2652310  |
| C | 0.2044280  | 1.3495950  | 1.3287770  |
| H | 2.2712260  | 0.5882240  | -1.2652310 |
| C | -0.9814330 | -0.2394070 | -0.7134060 |
| C | -0.9814330 | -0.2394070 | 0.7134060  |
| C | 1.4437710  | 0.9785600  | -0.6803540 |
| C | 0.2044280  | 1.3495950  | -1.3287770 |
| C | -0.2017330 | -1.4322270 | -1.1399300 |
| H | 0.1586200  | 1.2748110  | -2.4124940 |
| H | 0.1586200  | 1.2748110  | 2.4124940  |
| H | -1.8424730 | 0.0270670  | 1.3136670  |
| C | -0.2017330 | -1.4322270 | 1.1399300  |
| H | -1.8424730 | 0.0270670  | -1.3136670 |
| O | -0.0043460 | -1.8775480 | -2.2391910 |
| O | 0.3446450  | -2.0291160 | 0.0000000  |
| O | -0.0043460 | -1.8775480 | 2.2391910  |

**Reactions in Scheme 1: Anthracene + Substrates 1a-1e**

24

Anthracene B3LYP/6-31+G(d) Optimized Geometry

|   |           |            |            |
|---|-----------|------------|------------|
| C | 0.0000000 | 2.4822450  | 1.4084520  |
| C | 0.0000000 | 2.4822450  | -1.4084520 |
| C | 0.0000000 | -2.4822450 | -1.4084520 |
| C | 0.0000000 | -2.4822450 | 1.4084520  |
| C | 0.0000000 | 0.0000000  | -1.4046120 |
| C | 0.0000000 | 0.0000000  | 1.4046120  |
| C | 0.0000000 | 3.6654190  | 0.7139420  |
| C | 0.0000000 | 3.6654190  | -0.7139420 |
| C | 0.0000000 | -3.6654190 | -0.7139420 |
| C | 0.0000000 | -3.6654190 | 0.7139420  |
| C | 0.0000000 | -1.2252350 | -0.7230720 |
| C | 0.0000000 | -1.2252350 | 0.7230720  |
| C | 0.0000000 | 1.2252350  | -0.7230720 |
| C | 0.0000000 | 1.2252350  | 0.7230720  |
| H | 0.0000000 | 4.6122370  | 1.2480210  |
| H | 0.0000000 | 4.6122370  | -1.2480210 |
| H | 0.0000000 | -4.6122370 | -1.2480210 |
| H | 0.0000000 | -4.6122370 | 1.2480210  |
| H | 0.0000000 | 2.4802410  | 2.4964450  |
| H | 0.0000000 | 2.4802410  | -2.4964450 |
| H | 0.0000000 | -2.4802410 | -2.4964450 |
| H | 0.0000000 | -2.4802410 | 2.4964450  |
| H | 0.0000000 | 0.0000000  | -2.4934550 |
| H | 0.0000000 | 0.0000000  | 2.4934550  |

55

2a B3LYP/6-31+G(d) Optimized Geometry

|   |            |            |            |
|---|------------|------------|------------|
| C | 3.8025730  | -2.1092980 | 0.6983270  |
| C | 3.8025730  | -2.1092980 | -0.6983270 |
| C | -2.2431690 | -4.3828110 | -0.6983800 |
| C | -2.2431690 | -4.3828110 | 0.6983800  |
| C | 2.6255030  | -1.8266930 | -1.4043330 |
| C | 2.6255030  | -1.8266930 | 1.4043330  |
| C | -1.5139080 | -3.4176150 | -1.4066110 |
| C | -1.5139080 | -3.4176150 | 1.4066110  |
| C | -0.7808480 | -2.4658290 | -0.7038550 |
| C | -0.7808480 | -2.4658290 | 0.7038550  |
| C | 1.4567720  | -1.5478250 | -0.7027840 |
| C | 1.4567720  | -1.5478250 | 0.7027840  |
| H | 4.7170100  | -2.3338890 | 1.2413400  |
| H | 4.7170100  | -2.3338890 | -1.2413400 |

|   |            |            |            |
|---|------------|------------|------------|
| H | -2.8153870 | -5.1305580 | -1.2411340 |
| H | -2.8153870 | -5.1305580 | 1.2411340  |
| H | 2.6234840  | -1.8363170 | -2.4923680 |
| H | 2.6234840  | -1.8363170 | 2.4923680  |
| H | -1.5255010 | -3.4082410 | -2.4939620 |
| H | -1.5255010 | -3.4082410 | 2.4939620  |
| C | 0.0745300  | -1.3490980 | -1.3020840 |
| C | 0.0745300  | -1.3490980 | 1.3020840  |
| C | -0.5583720 | 0.0000080  | -0.7778890 |
| C | -0.5583720 | 0.0000080  | 0.7778890  |
| C | -2.0441920 | 0.0000330  | -1.1445710 |
| C | -2.0441920 | 0.0000330  | 1.1445710  |
| O | -2.8281210 | 0.0000210  | 0.0000000  |
| O | -2.5351550 | -0.0000290 | -2.2394540 |
| O | -2.5351550 | -0.0000290 | 2.2394540  |
| H | 0.0753690  | -1.3667840 | -2.3954240 |
| H | 0.0753690  | -1.3667840 | 2.3954240  |
| C | 3.8026150  | 2.1092110  | 0.6983280  |
| C | 3.8026150  | 2.1092110  | -0.6983280 |
| C | 1.4567940  | 1.5478160  | -0.7027830 |
| C | 1.4567940  | 1.5478160  | 0.7027830  |
| C | 2.6255370  | 1.8266440  | -1.4043320 |
| C | 2.6255370  | 1.8266440  | 1.4043320  |
| C | 0.0745510  | 1.3491250  | -1.3020850 |
| C | 0.0745510  | 1.3491250  | 1.3020850  |
| C | -0.7808120 | 2.4658590  | -0.7038550 |
| C | -0.7808120 | 2.4658590  | 0.7038550  |
| C | -2.2431140 | 4.3828570  | -0.6983810 |
| C | -2.2431140 | 4.3828570  | 0.6983810  |
| C | -1.5138640 | 3.4176530  | -1.4066100 |
| C | -1.5138640 | 3.4176530  | 1.4066100  |
| H | 4.7170600  | 2.3337740  | 1.2413390  |
| H | 4.7170600  | 2.3337740  | -1.2413390 |
| H | 2.6235150  | 1.8362650  | -2.4923680 |
| H | 2.6235150  | 1.8362650  | 2.4923680  |
| H | 0.0753850  | 1.3667980  | -2.3954240 |
| H | 0.0753850  | 1.3667980  | 2.3954240  |
| H | -2.8153240 | 5.1306100  | -1.2411340 |
| H | -2.8153240 | 5.1306100  | 1.2411340  |
| H | -1.5254570 | 3.4082770  | 2.4939620  |
| H | -1.5254570 | 3.4082770  | -2.4939620 |

31

1a B3LYP/6-31+G(d) Optimized Geometry

|   |            |           |            |
|---|------------|-----------|------------|
| C | -3.2846480 | 0.6975370 | -2.0897840 |
|---|------------|-----------|------------|

|   |            |            |            |   |            |            |            |
|---|------------|------------|------------|---|------------|------------|------------|
| C | -3.2846480 | -0.6975370 | -2.0897840 | H | 3.7600950  | -3.6735360 | 1.2417830  |
| C | 3.2846480  | -0.6975370 | -2.0897840 | H | 3.7600950  | -3.6735360 | -1.2417830 |
| C | 3.2846480  | 0.6975370  | -2.0897840 | H | -4.1024830 | -4.3193320 | -1.2407100 |
| C | -2.2465210 | -1.4073090 | -1.4648170 | H | -4.1024830 | -4.3193320 | 1.2407100  |
| C | -2.2465210 | 1.4073090  | -1.4648170 | H | 1.9239540  | -2.5517140 | -2.4917590 |
| C | 2.2465210  | -1.4073090 | -1.4648170 | H | 1.9239540  | -2.5517140 | 2.4917590  |
| C | 2.2465210  | 1.4073090  | -1.4648170 | H | -2.4265350 | -2.9673690 | -2.4950050 |
| C | 1.2212770  | -0.7036480 | -0.8448350 | H | -2.4265350 | -2.9673690 | 2.4950050  |
| C | 1.2212770  | 0.7036480  | -0.8448350 | C | -0.3715420 | -1.3414720 | -1.3083480 |
| C | -1.2212770 | -0.7036480 | -0.8448350 | C | -0.3715420 | -1.3414720 | 1.3083480  |
| C | -1.2212770 | 0.7036480  | -0.8448350 | C | -0.6658880 | 0.0419190  | -0.7080630 |
| H | -4.0925200 | 1.2408910  | -2.5726350 | C | -0.6658880 | 0.0419190  | 0.7080630  |
| H | -4.0925200 | -1.2408910 | -2.5726350 | C | -1.8780420 | 0.7796440  | -1.1403100 |
| H | 4.0925200  | -1.2408910 | -2.5726350 | C | -1.8780420 | 0.7796440  | 1.1403100  |
| H | 4.0925200  | 1.2408910  | -2.5726350 | O | -2.4994120 | 1.3004280  | 0.0000000  |
| H | -2.2473570 | -2.4948920 | -1.4644400 | O | -2.3448190 | 0.9413280  | -2.2383710 |
| H | -2.2473570 | 2.4948920  | -1.4644400 | O | -2.3448190 | 0.9413280  | 2.2383710  |
| H | 2.2473570  | -2.4948920 | -1.4644400 | H | -0.3768600 | -1.3474470 | -2.4004870 |
| H | 2.2473570  | 2.4948920  | -1.4644400 | H | -0.3768600 | -1.3474470 | 2.4004870  |
| C | 0.0000000  | -1.3149510 | -0.1304590 | C | 4.2505640  | 0.3776580  | 0.7057430  |
| C | 0.0000000  | 1.3149510  | -0.1304590 | C | 4.2505640  | 0.3776580  | -0.7057430 |
| C | 0.0000000  | -0.6704970 | 1.2354890  | C | 1.9819930  | 1.2290740  | 0.7117730  |
| C | 0.0000000  | 0.6704970  | 1.2354890  | C | 1.9819930  | 1.2290740  | -0.7117730 |
| C | 0.0000000  | -1.1446270 | 2.6358810  | C | 3.1229880  | 0.7705270  | -1.4059100 |
| C | 0.0000000  | 1.1446270  | 2.6358810  | C | 3.1229880  | 0.7705270  | 1.4059100  |
| O | 0.0000000  | 0.0000000  | 3.4488840  | C | 0.7990360  | 1.7236330  | -1.3608190 |
| O | 0.0000000  | -2.2544450 | 3.0930450  | C | 0.7990360  | 1.7236330  | 1.3608190  |
| O | 0.0000000  | 2.2544450  | 3.0930450  | C | -1.3103620 | 4.7730980  | -0.7057610 |
| H | 0.0000000  | -2.4059460 | -0.1179790 | C | -1.3103620 | 4.7730980  | 0.7057610  |
| H | 0.0000000  | 2.4059460  | -0.1179790 | C | 0.0941030  | 2.7980050  | -0.7123660 |
|   |            |            |            | C | 0.0941030  | 2.7980050  | 0.7123660  |
|   |            |            |            | C | -0.6368760 | 3.7877790  | -1.4075290 |
|   |            |            |            | C | -0.6368760 | 3.7877790  | 1.4075290  |
|   |            |            |            | H | 5.1402730  | 0.0613990  | 1.2436910  |
|   |            |            |            | H | 5.1402730  | 0.0613990  | -1.2436910 |
|   |            |            |            | H | 3.1184460  | 0.7633140  | -2.4934750 |
|   |            |            |            | H | 3.1184460  | 0.7633140  | 2.4934750  |
|   |            |            |            | H | 0.7364400  | 1.6563760  | -2.4453460 |
|   |            |            |            | H | 0.7364400  | 1.6563760  | 2.4453460  |
|   |            |            |            | H | -1.8530280 | 5.5453130  | -1.2441770 |
|   |            |            |            | H | -1.8530280 | 5.5453130  | 1.2441770  |
|   |            |            |            | H | -0.6555860 | 3.7724790  | 2.4940880  |
|   |            |            |            | H | -0.6555860 | 3.7724790  | -2.4940880 |

55  
TS2a B3LYP/6-31+G(d) Optimized Geometry

|   |            |            |            |
|---|------------|------------|------------|
| C | 2.9631720  | -3.1723480 | 0.6982240  |
| C | 2.9631720  | -3.1723480 | -0.6982240 |
| C | -3.3649150 | -3.7346070 | -0.6972400 |
| C | -3.3649150 | -3.7346070 | 0.6972400  |
| C | 1.9326110  | -2.5373760 | -1.4038160 |
| C | 1.9326110  | -2.5373760 | 1.4038160  |
| C | -2.4208650 | -2.9737940 | -1.4074950 |
| C | -2.4208650 | -2.9737940 | 1.4074950  |
| C | -1.4871280 | -2.2233760 | -0.7048770 |
| C | -1.4871280 | -2.2233760 | 0.7048770  |
| C | 0.9063990  | -1.9103350 | -0.7035380 |
| C | 0.9063990  | -1.9103350 | 0.7035380  |



61  
 2b B3LYP/6-31+G(d) Optimized Geometry

|   |            |            |            |
|---|------------|------------|------------|
| C | 2.7902650  | -3.0378230 | 0.6974820  |
| C | 2.7902650  | -3.0378230 | -0.6974820 |
| C | -3.6634490 | -3.2589020 | -0.6983670 |
| C | -3.6634490 | -3.2589020 | 0.6983670  |
| C | 1.7759100  | -2.4065970 | -1.4320020 |
| C | 1.7759100  | -2.4065970 | 1.4320020  |
| C | -2.6617280 | -2.5801880 | -1.4065710 |
| C | -2.6617280 | -2.5801880 | 1.4065710  |
| C | -1.6592870 | -1.9183490 | -0.7034210 |
| C | -1.6592870 | -1.9183490 | 0.7034210  |
| C | 0.7607110  | -1.7742890 | -0.7026460 |
| C | 0.7607110  | -1.7742890 | 0.7026460  |
| H | 3.5935960  | -3.5434360 | 1.2293520  |
| H | 3.5935960  | -3.5434360 | -1.2293520 |
| H | -4.4474350 | -3.7804810 | -1.2410820 |
| H | -4.4474350 | -3.7804810 | 1.2410820  |
| C | 1.7899170  | -2.4321420 | -2.9437090 |
| H | 0.9005190  | -2.9271460 | -3.3543920 |
| H | 1.8227740  | -1.4210060 | -3.3699240 |
| H | 2.6667480  | -2.9730530 | -3.3138910 |
| C | 1.7899170  | -2.4321420 | 2.9437090  |
| H | 0.9005190  | -2.9271460 | 3.3543920  |
| H | 1.8227740  | -1.4210060 | 3.3699240  |
| H | 2.6667480  | -2.9730530 | 3.3138910  |
| H | -2.6724150 | -2.5636480 | -2.4939180 |
| H | -2.6724150 | -2.5636480 | 2.4939180  |
| C | -0.4891640 | -1.1366070 | -1.2979270 |
| C | -0.4891640 | -1.1366070 | 1.2979270  |
| C | -0.6517500 | 0.3448400  | -0.7765940 |
| C | -0.6517500 | 0.3448400  | 0.7765940  |
| C | -2.0577780 | 0.8241990  | -1.1443040 |
| C | -2.0577780 | 0.8241990  | 1.1443040  |
| O | -2.8014140 | 1.0730070  | 0.0000000  |
| O | -2.5218210 | 0.9849940  | -2.2392500 |
| O | -2.5218210 | 0.9849940  | 2.2392500  |
| H | -0.5041250 | -1.1460860 | -2.3895090 |
| H | -0.5041250 | -1.1460860 | 2.3895090  |
| C | 4.1576510  | 0.9282120  | 0.6981300  |
| C | 4.1576510  | 0.9282120  | -0.6981300 |
| C | 1.7556310  | 1.1537260  | -0.7030290 |
| C | 1.7556310  | 1.1537260  | 0.7030290  |
| C | 2.9519120  | 1.0413530  | -1.4041340 |
| C | 2.9519120  | 1.0413530  | 1.4041340  |

|   |            |           |            |
|---|------------|-----------|------------|
| C | 0.3833010  | 1.4149500 | -1.3020670 |
| C | 0.3833010  | 1.4149500 | 1.3020670  |
| C | -0.0615810 | 2.7493390 | -0.7038820 |
| C | -0.0615810 | 2.7493390 | 0.7038820  |
| C | -0.8179490 | 5.0387070 | -0.6983580 |
| C | -0.8179490 | 5.0387070 | 0.6983580  |
| C | -0.4437120 | 3.8883840 | -1.4066760 |
| C | -0.4437120 | 3.8883840 | 1.4066760  |
| H | 5.0956150  | 0.8463900 | 1.2412970  |
| H | 5.0956150  | 0.8463900 | -1.2412970 |
| H | 2.9541430  | 1.0561860 | -2.4921920 |
| H | 2.9541430  | 1.0561860 | 2.4921920  |
| H | 0.3893780  | 1.4314580 | -2.3954150 |
| H | 0.3893780  | 1.4314580 | 2.3954150  |
| H | -1.1146720 | 5.9323660 | -1.2410370 |
| H | -1.1146720 | 5.9323660 | 1.2410370  |
| H | -0.4572970 | 3.8835790 | 2.4940460  |
| H | -0.4572970 | 3.8835790 | -2.4940460 |

61  
 3b B3LYP/6-31+G(d) Optimized Geometry

|   |            |           |            |
|---|------------|-----------|------------|
| C | -4.1964910 | 1.0701630 | 0.6982710  |
| C | -4.1964910 | 1.0701630 | -0.6982710 |
| C | 1.2697360  | 4.4964610 | -0.6974300 |
| C | 1.2697360  | 4.4964610 | 0.6974300  |
| C | -2.9864080 | 1.0315310 | -1.4043040 |
| C | -2.9864080 | 1.0315310 | 1.4043040  |
| C | 0.7550750  | 3.4194400 | -1.4354630 |
| C | 0.7550750  | 3.4194400 | 1.4354630  |
| C | 0.2324050  | 2.3444390 | -0.7039750 |
| C | 0.2324050  | 2.3444390 | 0.7039750  |
| C | -1.7853940 | 0.9979140 | -0.7023910 |
| C | -1.7853940 | 0.9979140 | 0.7023910  |
| H | -5.1375070 | 1.1035520 | 1.2413720  |
| H | -5.1375070 | 1.1035520 | -1.2413720 |
| H | 1.6812350  | 5.3520620 | -1.2285560 |
| H | 1.6812350  | 5.3520620 | 1.2285560  |
| C | 0.7730380  | 3.4376400 | -2.9471940 |
| H | -0.2396690 | 3.3796450 | -3.3673620 |
| H | 1.2291220  | 4.3617580 | -3.3163710 |
| H | 1.3472260  | 2.5963480 | -3.3537940 |
| C | 0.7730380  | 3.4376400 | 2.9471940  |
| H | -0.2396690 | 3.3796450 | 3.3673620  |
| H | 1.2291220  | 4.3617580 | 3.3163710  |
| H | 1.3472260  | 2.5963480 | 3.3537940  |

|   |            |            |            |
|---|------------|------------|------------|
| H | -2.9867860 | 1.0355050  | -2.4924660 |
| H | -2.9867860 | 1.0355050  | 2.4924660  |
| C | -0.3908040 | 1.0754200  | -1.2980350 |
| C | -0.3908040 | 1.0754200  | 1.2980350  |
| C | 0.4959640  | -0.1214920 | -0.7768630 |
| C | 0.4959640  | -0.1214920 | 0.7768630  |
| C | 1.9514370  | 0.1763820  | -1.1433920 |
| C | 1.9514370  | 0.1763820  | 1.1433920  |
| O | 2.7215290  | 0.3254510  | 0.0000000  |
| O | 2.4324330  | 0.2793450  | -2.2386180 |
| O | 2.4324330  | 0.2793450  | 2.2386180  |
| H | -0.4003660 | 1.0826980  | -2.3898770 |
| H | -0.4003660 | 1.0826980  | 2.3898770  |
| C | -3.3618050 | -3.0481060 | 0.6983120  |
| C | -3.3618050 | -3.0481060 | -0.6983120 |
| C | -1.1719830 | -2.0364500 | -0.7028390 |
| C | -1.1719830 | -2.0364500 | 0.7028390  |
| C | -2.2635530 | -2.5389050 | -1.4042530 |
| C | -2.2635530 | -2.5389050 | 1.4042530  |
| C | 0.1440620  | -1.5687650 | -1.3022010 |
| C | 0.1440620  | -1.5687650 | 1.3022010  |
| C | 1.2016570  | -2.4961560 | -0.7039220 |
| C | 1.2016570  | -2.4961560 | 0.7039220  |
| C | 3.0058810  | -4.0956360 | -0.6983340 |
| C | 3.0058810  | -4.0956360 | 0.6983340  |
| C | 2.1044760  | -3.2889450 | -1.4066410 |
| C | 2.1044760  | -3.2889450 | 1.4066410  |
| H | -4.2141310 | -3.4482410 | 1.2413980  |
| H | -4.2141310 | -3.4482410 | -1.2413980 |
| H | -2.2603910 | -2.5463170 | -2.4923250 |
| H | -2.2603910 | -2.5463170 | 2.4923250  |
| H | 0.1471270  | -1.5851850 | -2.3955900 |
| H | 0.1471270  | -1.5851850 | 2.3955900  |
| H | 3.7112290  | -4.7195030 | -1.2409690 |
| H | 3.7112290  | -4.7195030 | 1.2409690  |
| H | 2.1135750  | -3.2784890 | 2.4940360  |
| H | 2.1135750  | -3.2784890 | -2.4940360 |

37

1b B3LYP/6-31+G(d) Optimized Geometry

|   |            |            |            |
|---|------------|------------|------------|
| C | -1.0446910 | 3.4476280  | 0.6968430  |
| C | -1.0446910 | 3.4476280  | -0.6968430 |
| C | 3.9295740  | -0.8177230 | -0.6974640 |
| C | 3.9295740  | -0.8177230 | 0.6974640  |
| C | -0.6711050 | 2.3118030  | -1.4355080 |

|   |            |            |            |
|---|------------|------------|------------|
| C | -0.6711050 | 2.3118030  | 1.4355080  |
| C | 2.7345830  | -0.6167110 | -1.4071820 |
| C | 2.7345830  | -0.6167110 | 1.4071820  |
| C | 1.5534380  | -0.4177020 | -0.7030680 |
| C | 1.5534380  | -0.4177020 | 0.7030680  |
| C | -0.3014290 | 1.1794440  | -0.7029850 |
| C | -0.3014290 | 1.1794440  | 0.7029850  |
| H | -1.3442030 | 4.3481280  | 1.2284840  |
| H | -1.3442030 | 4.3481280  | -1.2284840 |
| H | 4.8570990  | -0.9776580 | -1.2406870 |
| H | 4.8570990  | -0.9776580 | 1.2406870  |
| H | 2.7348460  | -0.6207350 | -2.4947670 |
| H | 2.7348460  | -0.6207350 | 2.4947670  |
| C | 0.1612290  | -0.1648010 | -1.3113130 |
| C | 0.1612290  | -0.1648010 | 1.3113130  |
| C | -0.7295480 | -1.2005430 | -0.6703500 |
| C | -0.7295480 | -1.2005430 | 0.6703500  |
| C | -1.6427650 | -2.2605770 | -1.1446050 |
| C | -1.6427650 | -2.2605770 | 1.1446050  |
| O | -2.1732620 | -2.8779610 | 0.0000000  |
| O | -1.9434630 | -2.6062610 | -2.2545740 |
| O | -1.9434630 | -2.6062610 | 2.2545740  |
| H | 0.1571860  | -0.1835910 | -2.4005810 |
| H | 0.1571860  | -0.1835910 | 2.4005810  |
| C | -0.6770790 | 2.3335630  | -2.9477250 |
| C | -0.6770790 | 2.3335630  | 2.9477250  |
| H | -1.0145450 | 3.3062450  | -3.3189680 |
| H | -1.0145450 | 3.3062450  | 3.3189680  |
| H | 0.3229590  | 2.1524790  | -3.3624470 |
| H | 0.3229590  | 2.1524790  | 3.3624470  |
| H | -1.3458390 | 1.5707840  | -3.3660700 |
| H | -1.3458390 | 1.5707840  | 3.3660700  |

61

TS2b B3LYP/6-31+G(d) Optimized Geometry

|   |            |            |            |
|---|------------|------------|------------|
| C | 2.0893190  | -3.5567500 | 0.6974060  |
| C | 2.0893190  | -3.5567500 | -0.6974060 |
| C | -4.2072130 | -2.6824020 | -0.6971730 |
| C | -4.2072130 | -2.6824020 | 0.6971730  |
| C | 1.2347720  | -2.7222310 | -1.4317900 |
| C | 1.2347720  | -2.7222310 | 1.4317900  |
| C | -3.1131320 | -2.1593080 | -1.4073910 |
| C | -3.1131320 | -2.1593080 | 1.4073910  |
| C | -2.0301160 | -1.6475780 | -0.7044190 |
| C | -2.0301160 | -1.6475780 | 0.7044190  |

|   |            |            |            |
|---|------------|------------|------------|
| C | 0.3782600  | -1.8862060 | -0.7033150 |
| C | 0.3782600  | -1.8862060 | 0.7033150  |
| H | 2.7626580  | -4.2259650 | 1.2293120  |
| H | 2.7626580  | -4.2259650 | -1.2293120 |
| H | -5.0606050 | -3.0795450 | -1.2405950 |
| H | -5.0606050 | -3.0795450 | 1.2405950  |
| C | 1.2302660  | -2.7642580 | -2.9432320 |
| H | 0.2759180  | -3.1355750 | -3.3393250 |
| H | 1.3971840  | -1.7728220 | -3.3829570 |
| H | 2.0183040  | -3.4275220 | -3.3146040 |
| C | 1.2302660  | -2.7642580 | 2.9432320  |
| H | 0.2759180  | -3.1355750 | 3.3393250  |
| H | 1.3971840  | -1.7728220 | 3.3829570  |
| H | 2.0183040  | -3.4275220 | 3.3146040  |
| H | -3.1198560 | -2.1468890 | -2.4949040 |
| H | -3.1198560 | -2.1468890 | 2.4949040  |
| C | -0.7438190 | -1.0399670 | -1.3041970 |
| C | -0.7438190 | -1.0399670 | 1.3041970  |
| C | -0.7198210 | 0.3747190  | -0.7072310 |
| C | -0.7198210 | 0.3747190  | 0.7072310  |
| C | -1.7359540 | 1.3647950  | -1.1404440 |
| C | -1.7359540 | 1.3647950  | 1.1404440  |
| O | -2.2271100 | 2.0104320  | 0.0000000  |
| O | -2.1537670 | 1.6277550  | -2.2387310 |
| O | -2.1537670 | 1.6277550  | 2.2387310  |
| H | -0.7589900 | -1.0369640 | -2.3945040 |
| H | -0.7589900 | -1.0369640 | 2.3945040  |
| C | 4.1463370  | -0.3948940 | 0.7056990  |
| C | 4.1463370  | -0.3948940 | -0.7056990 |
| C | 2.1239170  | 0.9409930  | 0.7118080  |
| C | 2.1239170  | 0.9409930  | -0.7118080 |
| C | 3.1350100  | 0.2405130  | -1.4054080 |
| C | 3.1350100  | 0.2405130  | 1.4054080  |
| C | 1.0824570  | 1.6880320  | -1.3610970 |
| C | 1.0824570  | 1.6880320  | 1.3610970  |
| C | -0.2983560 | 5.1290460  | -0.7057780 |
| C | -0.2983560 | 5.1290460  | 0.7057780  |
| C | 0.6341570  | 2.8920570  | -0.7123450 |
| C | 0.6341570  | 2.8920570  | 0.7123450  |
| C | 0.1404140  | 4.0191580  | -1.4075010 |
| C | 0.1404140  | 4.0191580  | 1.4075010  |
| H | 4.9436470  | -0.9004630 | 1.2439020  |
| H | 4.9436470  | -0.9004630 | -1.2439020 |
| H | 3.1332300  | 0.2398860  | -2.4930570 |
| H | 3.1332300  | 0.2398860  | 2.4930570  |

|   |            |           |            |
|---|------------|-----------|------------|
| H | 1.0078950  | 1.6380720 | -2.4458430 |
| H | 1.0078950  | 1.6380720 | 2.4458430  |
| H | -0.6572610 | 6.0020380 | -1.2440920 |
| H | -0.6572610 | 6.0020380 | 1.2440920  |
| H | 0.1174660  | 4.0076680 | 2.4940430  |
| H | 0.1174660  | 4.0076680 | -2.4940430 |

61

TS3b B3LYP/6-31+G(d) Optimized Geometry

|   |            |            |            |
|---|------------|------------|------------|
| C | -3.8777410 | 1.9195810  | 0.6982590  |
| C | -3.8777410 | 1.9195810  | -0.6982590 |
| C | 2.0064180  | 4.3165300  | -0.6965720 |
| C | 2.0064180  | 4.3165300  | 0.6965720  |
| C | -2.7048920 | 1.6196750  | -1.4039800 |
| C | -2.7048920 | 1.6196750  | 1.4039800  |
| C | 1.3340940  | 3.3264670  | -1.4357370 |
| C | 1.3340940  | 3.3264670  | 1.4357370  |
| C | 0.6594960  | 2.3446570  | -0.7045320 |
| C | 0.6594960  | 2.3446570  | 0.7045320  |
| C | -1.5383770 | 1.3282750  | -0.7030440 |
| C | -1.5383770 | 1.3282750  | 0.7030440  |
| H | -4.7880180 | 2.1604950  | 1.2415610  |
| H | -4.7880180 | 2.1604950  | -1.2415610 |
| H | 2.5474460  | 5.0960300  | -1.2288210 |
| H | 2.5474460  | 5.0960300  | 1.2288210  |
| C | 1.3617620  | 3.3344880  | -2.9476890 |
| H | 1.9636260  | 4.1701400  | -3.3188920 |
| H | 1.7936350  | 2.4088300  | -3.3475210 |
| H | 0.3553170  | 3.4390450  | -3.3737260 |
| C | 1.3617620  | 3.3344880  | 2.9476890  |
| H | 1.9636260  | 4.1701400  | 3.3188920  |
| H | 1.7936350  | 2.4088300  | 3.3475210  |
| H | 0.3553170  | 3.4390450  | 3.3737260  |
| H | -2.7017540 | 1.6334660  | -2.4920310 |
| H | -2.7017540 | 1.6334660  | 2.4920310  |
| C | -0.1492090 | 1.1658490  | -1.3045520 |
| C | -0.1492090 | 1.1658490  | 1.3045520  |
| C | 0.5485250  | -0.0643680 | -0.7072300 |
| C | 0.5485250  | -0.0643680 | 0.7072300  |
| C | 1.9272540  | -0.3965180 | -1.1393120 |
| C | 1.9272540  | -0.3965180 | 1.1393120  |
| O | 2.6777980  | -0.7066830 | 0.0000000  |
| O | 2.4233460  | -0.4018000 | -2.2370670 |
| O | 2.4233460  | -0.4018000 | 2.2370670  |
| H | -0.1526830 | 1.1646710  | -2.3951070 |

|   |            |            |            |   |            |            |            |
|---|------------|------------|------------|---|------------|------------|------------|
| H | -0.1526830 | 1.1646710  | 2.3951070  | O | 0.5888860  | -2.5666110 | -2.7827030 |
| C | -4.0324540 | -1.8671450 | 0.7058320  | O | 0.5888860  | -2.5666110 | 2.7827030  |
| C | -4.0324540 | -1.8671450 | -0.7058320 | C | 1.2296710  | -3.5786020 | -3.5462110 |
| C | -1.6128830 | -2.0006110 | 0.7119320  | H | 1.0480150  | -3.3224090 | -4.5917350 |
| C | -1.6128830 | -2.0006110 | -0.7119320 | H | 2.3115440  | -3.5975660 | -3.3583160 |
| C | -2.8390780 | -1.9046910 | -1.4058850 | H | 0.8039000  | -4.5684920 | -3.3339410 |
| C | -2.8390780 | -1.9046910 | 1.4058850  | C | 1.2296710  | -3.5786020 | 3.5462110  |
| C | -0.3364100 | -2.1156440 | -1.3612050 | H | 1.0480150  | -3.3224090 | 4.5917350  |
| C | -0.3364100 | -2.1156440 | 1.3612050  | H | 2.3115440  | -3.5975660 | 3.3583160  |
| C | 2.5970230  | -4.3832590 | -0.7058460 | H | 0.8039000  | -4.5684920 | 3.3339410  |
| C | 2.5970230  | -4.3832590 | 0.7058460  | H | -3.5351290 | -1.1117950 | -2.4944850 |
| C | 0.6617430  | -2.9240830 | -0.7124340 | H | -3.5351290 | -1.1117950 | 2.4944850  |
| C | 0.6617430  | -2.9240830 | 0.7124340  | C | -0.9759850 | -0.6195860 | -1.3019290 |
| C | 1.6576130  | -3.6470960 | -1.4075220 | C | -0.9759850 | -0.6195860 | 1.3019290  |
| C | 1.6576130  | -3.6470960 | 1.4075220  | C | -0.5560290 | 0.8092110  | -0.7774910 |
| H | -4.9760670 | -1.8313630 | 1.2437380  | C | -0.5560290 | 0.8092110  | 0.7774910  |
| H | -4.9760670 | -1.8313630 | -1.2437380 | C | -1.6657120 | 1.7960580  | -1.1449000 |
| H | -2.8369710 | -1.8963570 | -2.4934640 | C | -1.6657120 | 1.7960580  | 1.1449000  |
| H | -2.8369710 | -1.8963570 | 2.4934640  | O | -2.2538570 | 2.3143020  | 0.0000000  |
| H | -0.2974020 | -2.0326920 | -2.4457790 | O | -2.0318400 | 2.1252520  | -2.2392320 |
| H | -0.2974020 | -2.0326920 | 2.4457790  | O | -2.0318400 | 2.1252520  | 2.2392320  |
| H | 3.3472760  | -4.9559710 | -1.2442210 | H | -0.9819290 | -0.6388540 | -2.3923290 |
| H | 3.3472760  | -4.9559710 | 1.2442210  | H | -0.9819290 | -0.6388540 | 2.3923290  |
| H | 1.6703270  | -3.6278180 | 2.4941610  | C | 4.0847440  | -0.5529870 | 0.6982630  |
| H | 1.6703270  | -3.6278180 | -2.4941610 | C | 4.0847440  | -0.5529870 | -0.6982630 |

63

2c B3LYP/6-31+G(d) Optimized Geometry

|   |            |            |            |   |           |            |            |
|---|------------|------------|------------|---|-----------|------------|------------|
| C | 1.3171080  | -3.6464340 | 0.7012830  | C | 0.8143500 | 1.3913650  | -1.3026710 |
| C | 1.3171080  | -3.6464340 | -0.7012830 | C | 0.8143500 | 1.3913650  | 1.3026710  |
| C | -4.7179990 | -1.3737100 | -0.6984350 | C | 0.9274950 | 2.7927790  | -0.7039030 |
| C | -4.7179990 | -1.3737100 | 0.6984350  | C | 0.9274950 | 2.7927790  | 0.7039030  |
| C | 0.6339720  | -2.6566840 | -1.4129930 | C | 1.1307210 | 5.1955370  | -0.6983880 |
| C | 0.6339720  | -2.6566840 | 1.4129930  | C | 1.1307210 | 5.1955370  | 0.6983880  |
| C | -3.5337400 | -1.1270850 | -1.4071940 | C | 1.0233790 | 3.9906190  | -1.4065290 |
| C | -3.5337400 | -1.1270850 | 1.4071940  | C | 1.0233790 | 3.9906190  | 1.4065290  |
| C | -2.3555120 | -0.8944780 | -0.7036680 | H | 4.9135030 | -1.0006750 | 1.2411230  |
| C | -2.3555120 | -0.8944780 | 0.7036680  | H | 4.9135030 | -1.0006750 | -1.2411230 |
| C | -0.0672770 | -1.6774420 | -0.6974610 | H | 3.0243170 | 0.0349230  | -2.4927600 |
| C | -0.0672770 | -1.6774420 | 0.6974610  | H | 3.0243170 | 0.0349230  | 2.4927600  |
| H | 1.8610630  | -4.4291880 | 1.2180080  | H | 0.8260800 | 1.4023310  | -2.3957850 |
| H | 1.8610630  | -4.4291880 | -1.2180080 | H | 0.8260800 | 1.4023310  | 2.3957850  |
| H | -5.6413890 | -1.5593890 | -1.2409100 | H | 1.2088160 | 6.1339300  | -1.2411460 |
| H | -5.6413890 | -1.5593890 | 1.2409100  | H | 1.2088160 | 6.1339300  | 1.2411460  |

|    |                                    |            |            |
|----|------------------------------------|------------|------------|
| H  | 1.0086440                          | 3.9912790  | 2.4939060  |
| H  | 1.0086440                          | 3.9912790  | -2.4939060 |
| 63 |                                    |            |            |
| 3c | B3LYP/6-31+G(d) Optimized Geometry |            |            |
| C  | -4.3526650                         | 0.2362710  | 0.6983840  |
| C  | -4.3526650                         | 0.2362710  | -0.6983840 |
| C  | 0.6271450                          | 4.3517160  | -0.7008530 |
| C  | 0.6271450                          | 4.3517160  | 0.7008530  |
| C  | -3.1477180                         | 0.3531120  | -1.4047700 |
| C  | -3.1477180                         | 0.3531120  | 1.4047700  |
| C  | 0.2416890                          | 3.2128220  | -1.4168910 |
| C  | 0.2416890                          | 3.2128220  | 1.4168910  |
| C  | -0.1366800                         | 2.0701420  | -0.6988830 |
| C  | -0.1366800                         | 2.0701420  | 0.6988830  |
| C  | -1.9524590                         | 0.4726440  | -0.7026840 |
| C  | -1.9524590                         | 0.4726440  | 0.7026840  |
| H  | -5.2904750                         | 0.1498780  | 1.2413600  |
| H  | -5.2904750                         | 0.1498780  | -1.2413600 |
| H  | 0.9278760                          | 5.2561580  | -1.2180240 |
| H  | 0.9278760                          | 5.2561580  | 1.2180240  |
| O  | 0.1923500                          | 3.1258780  | -2.7822670 |
| O  | 0.1923500                          | 3.1258780  | 2.7822670  |
| C  | 0.7034910                          | 4.2089260  | -3.5469850 |
| H  | 0.1120500                          | 5.1217260  | -3.3936560 |
| H  | 1.7554870                          | 4.4045910  | -3.3021190 |
| H  | 0.6248710                          | 3.8983110  | -4.5903010 |
| C  | 0.7034910                          | 4.2089260  | 3.5469850  |
| H  | 0.1120500                          | 5.1217260  | 3.3936560  |
| H  | 1.7554870                          | 4.4045910  | 3.3021190  |
| H  | 0.6248710                          | 3.8983110  | 4.5903010  |
| H  | -3.1480460                         | 0.3637520  | -2.4927120 |
| H  | -3.1480460                         | 0.3637520  | 2.4927120  |
| C  | -0.5810650                         | 0.7374150  | -1.3020500 |
| C  | -0.5810650                         | 0.7374150  | 1.3020500  |
| C  | 0.4592320                          | -0.3284010 | -0.7779190 |
| C  | 0.4592320                          | -0.3284010 | 0.7779190  |
| C  | 1.8640130                          | 0.1573680  | -1.1451580 |
| C  | 1.8640130                          | 0.1573680  | 1.1451580  |
| O  | 2.6039460                          | 0.4159150  | 0.0000000  |
| O  | 2.3345390                          | 0.3090220  | -2.2383920 |
| O  | 2.3345390                          | 0.3090220  | 2.2383920  |
| H  | -0.5854030                         | 0.7622670  | -2.3927160 |
| H  | -0.5854030                         | 0.7622670  | 2.3927160  |
| C  | -2.9751540                         | -3.7419910 | 0.6983190  |

|    |                                    |            |            |
|----|------------------------------------|------------|------------|
| C  | -2.9751540                         | -3.7419910 | -0.6983190 |
| C  | -0.9376740                         | -2.4505550 | -0.7028670 |
| C  | -0.9376740                         | -2.4505550 | 0.7028670  |
| C  | -1.9532970                         | -3.0928190 | -1.4041560 |
| C  | -1.9532970                         | -3.0928190 | 1.4041560  |
| C  | 0.3032850                          | -1.8098110 | -1.3024100 |
| C  | 0.3032850                          | -1.8098110 | 1.3024100  |
| C  | 1.4761960                          | -2.5863230 | -0.7039220 |
| C  | 1.4761960                          | -2.5863230 | 0.7039220  |
| C  | 3.4850620                          | -3.9200950 | -0.6983940 |
| C  | 3.4850620                          | -3.9200950 | 0.6983940  |
| C  | 2.4804080                          | -3.2459600 | -1.4064530 |
| C  | 2.4804080                          | -3.2459600 | 1.4064530  |
| H  | -3.7680240                         | -4.2497920 | 1.2415530  |
| H  | -3.7680240                         | -4.2497920 | -1.2415530 |
| H  | -1.9495290                         | -3.0985900 | -2.4922230 |
| H  | -1.9495290                         | -3.0985900 | 2.4922230  |
| H  | 0.3083120                          | -1.8264380 | -2.3957400 |
| H  | 0.3083120                          | -1.8264380 | 2.3957400  |
| H  | 4.2705310                          | -4.4393640 | -1.2412540 |
| H  | 4.2705310                          | -4.4393640 | 1.2412540  |
| H  | 2.4886150                          | -3.2321260 | 2.4938060  |
| H  | 2.4886150                          | -3.2321260 | -2.4938060 |
| 39 |                                    |            |            |
| 1c | B3LYP/6-31+G(d) Optimized Geometry |            |            |
| C  | -0.3232740                         | 3.2636720  | 0.7006900  |
| C  | -0.3232740                         | 3.2636720  | -0.7006900 |
| C  | 3.7257850                          | -1.8953810 | -0.6974590 |
| C  | 3.7257850                          | -1.8953810 | 0.6974590  |
| C  | -0.1761110                         | 2.0694450  | -1.4171660 |
| C  | -0.1761110                         | 2.0694450  | 1.4171660  |
| C  | 2.5932560                          | -1.4642800 | -1.4076290 |
| C  | 2.5932560                          | -1.4642800 | 1.4076290  |
| C  | 1.4733790                          | -1.0402880 | -0.7034180 |
| C  | 1.4733790                          | -1.0402880 | 0.7034180  |
| C  | -0.0356450                         | 0.8774820  | -0.6976400 |
| C  | -0.0356450                         | 0.8774820  | 0.6976400  |
| H  | -0.4427650                         | 4.2090990  | 1.2177680  |
| H  | -0.4427650                         | 4.2090990  | -1.2177680 |
| H  | 4.6045480                          | -2.2327590 | -1.2406940 |
| H  | 4.6045480                          | -2.2327590 | 1.2406940  |
| H  | 2.5931400                          | -1.4634670 | -2.4950910 |
| H  | 2.5931400                          | -1.4634670 | 2.4950910  |
| C  | 0.1570120                          | -0.5217040 | -1.3146030 |

|   |            |            |            |
|---|------------|------------|------------|
| C | 0.1570120  | -0.5217040 | 1.3146030  |
| C | -0.9165380 | -1.3673630 | -0.6706960 |
| C | -0.9165380 | -1.3673630 | 0.6706960  |
| C | -2.0136920 | -2.2359680 | -1.1451330 |
| C | -2.0136920 | -2.2359680 | 1.1451330  |
| O | -2.6531160 | -2.7393480 | 0.0000000  |
| O | -2.3734170 | -2.5227680 | -2.2541770 |
| O | -2.3734170 | -2.5227680 | 2.2541770  |
| H | 0.1461600  | -0.5186210 | -2.4032050 |
| H | 0.1461600  | -0.5186210 | 2.4032050  |
| O | -0.1583030 | 1.9692850  | -2.7835770 |
| O | -0.1583030 | 1.9692850  | 2.7835770  |
| C | -0.3138180 | 3.1556890  | -3.5512060 |
| C | -0.3138180 | 3.1556890  | 3.5512060  |
| H | -1.2810550 | 3.6354070  | -3.3516100 |
| H | -1.2810550 | 3.6354070  | 3.3516100  |
| H | 0.4984000  | 3.8675600  | -3.3532440 |
| H | 0.4984000  | 3.8675600  | 3.3532440  |
| H | -0.2743200 | 2.8402140  | -4.5951120 |
| H | -0.2743200 | 2.8402140  | 4.5951120  |

63

TS2c B3LYP/6-31+G(d) Optimized Geometry

|   |            |            |            |
|---|------------|------------|------------|
| C | 1.1892350  | -3.6926650 | 0.7014700  |
| C | 1.1892350  | -3.6926650 | -0.7014700 |
| C | -4.7552140 | -1.4974850 | -0.6972280 |
| C | -4.7552140 | -1.4974850 | 0.6972280  |
| C | 0.5522910  | -2.6729460 | -1.4124280 |
| C | 0.5522910  | -2.6729460 | 1.4124280  |
| C | -3.5762420 | -1.2139840 | -1.4079410 |
| C | -3.5762420 | -1.2139840 | 1.4079410  |
| C | -2.4112930 | -0.9370290 | -0.7046950 |
| C | -2.4112930 | -0.9370290 | 0.7046950  |
| C | -0.1093100 | -1.6647360 | -0.6978830 |
| C | -0.1093100 | -1.6647360 | 0.6978830  |
| H | 1.6955510  | -4.5001280 | 1.2185800  |
| H | 1.6955510  | -4.5001280 | -1.2185800 |
| H | -5.6724850 | -1.7094200 | -1.2405540 |
| H | -5.6724850 | -1.7094200 | 1.2405540  |
| O | 0.5068490  | -2.5838040 | -2.7824970 |
| O | 0.5068490  | -2.5838040 | 2.7824970  |
| C | 1.0881890  | -3.6308780 | -3.5454470 |
| H | 0.9149010  | -3.3692000 | -4.5910490 |
| H | 2.1687890  | -3.7074440 | -3.3638010 |
| H | 0.6120960  | -4.5962490 | -3.3270790 |

|   |            |            |            |
|---|------------|------------|------------|
| C | 1.0881890  | -3.6308780 | 3.5454470  |
| H | 0.9149010  | -3.3692000 | 4.5910490  |
| H | 2.1687890  | -3.7074440 | 3.3638010  |
| H | 0.6120960  | -4.5962490 | 3.3270790  |
| H | -3.5776550 | -1.2050490 | -2.4953800 |
| H | -3.5776550 | -1.2050490 | 2.4953800  |
| C | -1.0269790 | -0.6113160 | -1.3081770 |
| C | -1.0269790 | -0.6113160 | 1.3081770  |
| C | -0.7059170 | 0.7651190  | -0.7069830 |
| C | -0.7059170 | 0.7651190  | 0.7069830  |
| C | -1.4781770 | 1.9544780  | -1.1408900 |
| C | -1.4781770 | 1.9544780  | 1.1408900  |
| O | -1.8148120 | 2.6921810  | 0.0000000  |
| O | -1.8273670 | 2.3048140  | -2.2386960 |
| O | -1.8273670 | 2.3048140  | 2.2386960  |
| H | -1.0290040 | -0.6200410 | -2.3973990 |
| H | -1.0290040 | -0.6200410 | 2.3973990  |
| C | 3.8591280  | -1.0706510 | 0.7059740  |
| C | 3.8591280  | -1.0706510 | -0.7059740 |
| C | 2.1909910  | 0.6860030  | 0.7119040  |
| C | 2.1909910  | 0.6860030  | -0.7119040 |
| C | 3.0155940  | -0.2261920 | -1.4068570 |
| C | 3.0155940  | -0.2261920 | 1.4068570  |
| C | 1.3455270  | 1.6478170  | -1.3618270 |
| C | 1.3455270  | 1.6478170  | 1.3618270  |
| C | 0.7660320  | 5.3093660  | -0.7059380 |
| C | 0.7660320  | 5.3093660  | 0.7059380  |
| C | 1.1762850  | 2.9205850  | -0.7125550 |
| C | 1.1762850  | 2.9205850  | 0.7125550  |
| C | 0.9456760  | 4.1296280  | -1.4075690 |
| C | 0.9456760  | 4.1296280  | 1.4075690  |
| H | 4.5240230  | -1.7420050 | 1.2432120  |
| H | 4.5240230  | -1.7420050 | -1.2432120 |
| H | 3.0042070  | -0.2329570 | -2.4940920 |
| H | 3.0042070  | -0.2329570 | 2.4940920  |
| H | 1.2580140  | 1.6117750  | -2.4459420 |
| H | 1.2580140  | 1.6117750  | 2.4459420  |
| H | 0.6103720  | 6.2404050  | -1.2442050 |
| H | 0.6103720  | 6.2404050  | 1.2442050  |
| H | 0.9196870  | 4.1228210  | 2.4940670  |
| H | 0.9196870  | 4.1228210  | -2.4940670 |

63

TS3c B3LYP/6-31+G(d) Optimized Geometry

|   |            |           |           |
|---|------------|-----------|-----------|
| C | -4.2454510 | 0.7859600 | 0.6981970 |
|---|------------|-----------|-----------|

|   |            |            |            |
|---|------------|------------|------------|
| C | -4.2454510 | 0.7859600  | -0.6981970 |
| C | 0.9863780  | 4.3843110  | -0.7000810 |
| C | 0.9863780  | 4.3843110  | 0.7000810  |
| C | -3.0357770 | 0.7419710  | -1.4045480 |
| C | -3.0357770 | 0.7419710  | 1.4045480  |
| C | 0.5324530  | 3.2682760  | -1.4170410 |
| C | 0.5324530  | 3.2682760  | 1.4170410  |
| C | 0.0959610  | 2.1501980  | -0.6992820 |
| C | 0.0959610  | 2.1501980  | 0.6992820  |
| C | -1.8343560 | 0.7028650  | -0.7035870 |
| C | -1.8343560 | 0.7028650  | 0.7035870  |
| H | -5.1861670 | 0.8292870  | 1.2414800  |
| H | -5.1861670 | 0.8292870  | -1.2414800 |
| H | 1.3455540  | 5.2668960  | -1.2177690 |
| H | 1.3455540  | 5.2668960  | 1.2177690  |
| O | 0.4741600  | 3.1872100  | -2.7835420 |
| O | 0.4741600  | 3.1872100  | 2.7835420  |
| C | 1.0167880  | 4.2548600  | -3.5474680 |
| H | 0.4663910  | 5.1900390  | -3.3768690 |
| H | 2.0800460  | 4.4059310  | -3.3194340 |
| H | 0.9087060  | 3.9569940  | -4.5919150 |
| C | 1.0167880  | 4.2548600  | 3.5474680  |
| H | 0.4663910  | 5.1900390  | 3.3768690  |
| H | 2.0800460  | 4.4059310  | 3.3194340  |
| H | 0.9087060  | 3.9569940  | 4.5919150  |
| H | -3.0341680 | 0.7596270  | -2.4923580 |
| H | -3.0341680 | 0.7596270  | 2.4923580  |
| C | -0.4415450 | 0.8351830  | -1.3081420 |
| C | -0.4415450 | 0.8351830  | 1.3081420  |
| C | 0.4939760  | -0.2253540 | -0.7076330 |
| C | 0.4939760  | -0.2253540 | 0.7076330  |
| C | 1.9118420  | -0.2805940 | -1.1415510 |
| C | 1.9118420  | -0.2805940 | 1.1415510  |
| O | 2.7088420  | -0.4260480 | 0.0000000  |
| O | 2.4010840  | -0.2047150 | -2.2390050 |
| O | 2.4010840  | -0.2047150 | 2.2390050  |
| H | -0.4355160 | 0.8520290  | -2.3976590 |
| H | -0.4355160 | 0.8520290  | 2.3976590  |
| C | -3.6264690 | -2.9412940 | 0.7058280  |
| C | -3.6264690 | -2.9412940 | -0.7058280 |
| C | -1.2329020 | -2.5626340 | 0.7118560  |
| C | -1.2329020 | -2.5626340 | -0.7118560 |
| C | -2.4519590 | -2.7256930 | -1.4057320 |
| C | -2.4519590 | -2.7256930 | 1.4057320  |
| C | 0.0400830  | -2.4108790 | -1.3608410 |

|   |            |            |            |
|---|------------|------------|------------|
| C | 0.0400830  | -2.4108790 | 1.3608410  |
| C | 3.3755660  | -4.0310670 | -0.7057600 |
| C | 3.3755660  | -4.0310670 | 0.7057600  |
| C | 1.1813710  | -3.0017340 | -0.7124280 |
| C | 1.1813710  | -3.0017340 | 0.7124280  |
| C | 2.3045040  | -3.5044510 | -1.4074960 |
| C | 2.3045040  | -3.5044510 | 1.4074960  |
| H | -4.5564330 | -3.1044760 | 1.2439900  |
| H | -4.5564330 | -3.1044760 | -1.2439900 |
| H | -2.4515100 | -2.7154210 | -2.4932820 |
| H | -2.4515100 | -2.7154210 | 2.4932820  |
| H | 0.0609140  | -2.3207220 | -2.4453240 |
| H | 0.0609140  | -2.3207220 | 2.4453240  |
| H | 4.2282820  | -4.4358460 | -1.2441360 |
| H | 4.2282820  | -4.4358460 | 1.2441360  |
| H | 2.3138090  | -3.4796550 | 2.4940060  |
| H | 2.3138090  | -3.4796550 | -2.4940060 |

31

1d B3LYP/AVDZ' Optimized Geometry

|    |            |            |            |
|----|------------|------------|------------|
| C  | -2.1528660 | 3.7541100  | 0.6982110  |
| C  | -2.1528660 | 3.7541100  | -0.6982110 |
| C  | 3.0029980  | -0.3074020 | -0.6962590 |
| C  | 3.0029980  | -0.3074020 | 0.6962590  |
| C  | -1.7297500 | 2.6189460  | -1.4101540 |
| C  | -1.7297500 | 2.6189460  | 1.4101540  |
| C  | 1.7955790  | -0.1624020 | -1.3960070 |
| C  | 1.7955790  | -0.1624020 | 1.3960070  |
| C  | 0.5948800  | -0.0212400 | -0.7073880 |
| C  | 0.5948800  | -0.0212400 | 0.7073880  |
| C  | -1.3155840 | 1.4947740  | -0.7033620 |
| C  | -1.3155840 | 1.4947740  | 0.7033620  |
| H  | -2.4847130 | 4.6402020  | 1.2434980  |
| H  | -2.4847130 | 4.6402020  | -1.2434980 |
| H  | 3.9401090  | -0.4215020 | -1.2416620 |
| H  | 3.9401090  | -0.4215020 | 1.2416620  |
| H  | -1.7274760 | 2.6196290  | -2.5025630 |
| H  | -1.7274760 | 2.6196290  | 2.5025630  |
| Br | 1.8487810  | -0.1640920 | -3.3136030 |
| Br | 1.8487810  | -0.1640920 | 3.3136030  |
| C  | -0.8085560 | 0.1748560  | -1.3135910 |
| C  | -0.8085560 | 0.1748560  | 1.3135910  |
| C  | -1.6550550 | -0.8987220 | -0.6710190 |
| C  | -1.6550550 | -0.8987220 | 0.6710190  |

|   |            |            |            |
|---|------------|------------|------------|
| C | -2.5362260 | -1.9898600 | -1.1452300 |
| C | -2.5362260 | -1.9898600 | 1.1452300  |
| O | -3.0445310 | -2.6236820 | 0.0000000  |
| O | -2.8273310 | -2.3430250 | -2.2528270 |
| O | -2.8273310 | -2.3430250 | 2.2528270  |
| H | -0.8110020 | 0.1654460  | -2.4063410 |
| H | -0.8110020 | 0.1654460  | 2.4063410  |

55

2d B3LYP/AVDZ' Optimized Geometry

|   |            |            |            |
|---|------------|------------|------------|
| C | -0.4123110 | -0.4123110 | 0.6983310  |
| C | -4.0288990 | -0.4123110 | -0.6983310 |
| C | -1.2288520 | 5.4234640  | -0.6983790 |
| C | -1.2288520 | 5.4234640  | 0.6983790  |
| C | -2.9857930 | 0.2020380  | -1.4055210 |
| C | -2.9857930 | 0.2020380  | 1.4055210  |
| C | -1.0917470 | 4.2217970  | -1.4069180 |
| C | -1.0917470 | 4.2217970  | 1.4069180  |
| C | -0.9663270 | 3.0270460  | -0.7038070 |
| C | -0.9663270 | 3.0270460  | 0.7038070  |
| C | -1.9538360 | 0.8169370  | -0.7031740 |
| C | -1.9538360 | 0.8169370  | 0.7031740  |
| H | -4.8421900 | -0.8866360 | 1.2414930  |
| H | -4.8421900 | -0.8866360 | -1.2414930 |
| H | -1.3303560 | 6.3595990  | -1.2409700 |
| H | -1.3303560 | 6.3595990  | 1.2409700  |
| H | -2.9887030 | 0.2063890  | -2.4934060 |
| H | -2.9887030 | 0.2063890  | 2.4934060  |
| H | -1.0780930 | 4.2229760  | -2.4942510 |
| H | -1.0780930 | 4.2229760  | 2.4942510  |
| C | -0.8174020 | 1.6290660  | -1.3028630 |
| C | -0.8174020 | 1.6290660  | 1.3028630  |
| C | 0.5682050  | 1.0840060  | -0.7780190 |
| C | 0.5682050  | 1.0840060  | 0.7780190  |
| C | 1.6523110  | 2.1008300  | -1.1447430 |
| C | 1.6523110  | 2.1008300  | 1.1447430  |
| O | 2.2230460  | 2.6366370  | 0.0000000  |
| O | 2.0104070  | 2.4353860  | -2.2394780 |
| O | 2.0104070  | 2.4353860  | 2.2394780  |
| H | -0.8297660 | 1.6403570  | -2.3960290 |
| H | -0.8297660 | 1.6403570  | 2.3960290  |
| C | -1.2088570 | -3.4230940 | 0.6978540  |
| C | -1.2088570 | -3.4230940 | -0.6978540 |
| C | 0.1548860  | -1.4117500 | -0.7027150 |
| C | 0.1548860  | -1.4117500 | 0.7027150  |

|    |            |            |            |
|----|------------|------------|------------|
| C  | -0.5306460 | -2.4114240 | -1.3731840 |
| C  | -0.5306460 | -2.4114240 | 1.3731840  |
| C  | 1.0317160  | -0.3301870 | -1.3059170 |
| C  | 1.0317160  | -0.3301870 | 1.3059170  |
| C  | 2.4169370  | -0.5686770 | -0.7036870 |
| C  | 2.4169370  | -0.5686770 | 0.7036870  |
| C  | 4.7929000  | -0.9711790 | -0.6984390 |
| C  | 4.7929000  | -0.9711790 | 0.6984390  |
| C  | 3.6016070  | -0.7643370 | -1.4075180 |
| C  | 3.6016070  | -0.7643370 | 1.4075180  |
| H  | -1.7273250 | -4.1919500 | 1.2612910  |
| H  | -1.7273250 | -4.1919500 | -1.2612910 |
| Br | -0.5423090 | -2.4122620 | -3.4357940 |
| Br | -0.5423090 | -2.4122620 | 3.4357940  |
| H  | 1.0402370  | -0.3473430 | -2.3971260 |
| H  | 1.0402370  | -0.3473430 | 2.3971260  |
| H  | 5.7215220  | -1.1269060 | -1.2409740 |
| H  | 5.7215220  | -1.1269060 | 1.2409740  |
| H  | 3.6028110  | -0.7503000 | 2.4946770  |
| H  | 3.6028110  | -0.7503000 | -2.4946770 |

55

3d B3LYP/AVDZ' Optimized Geometry

|   |            |           |            |
|---|------------|-----------|------------|
| C | -3.0647050 | 3.9929510 | 0.6983220  |
| C | -3.0647050 | 3.9929510 | -0.6983220 |
| C | 3.3752880  | 4.3521770 | -0.6983560 |
| C | 3.3752880  | 4.3521770 | 0.6983560  |
| C | -2.0281280 | 3.3678580 | -1.4044940 |
| C | -2.0281280 | 3.3678580 | 1.4044940  |
| C | 2.3938310  | 3.6456090 | -1.4069980 |
| C | 2.3938310  | 3.6456090 | 1.4069980  |
| C | 1.4120670  | 2.9532960 | -0.7038430 |
| C | 1.4120670  | 2.9532960 | 0.7038430  |
| C | -0.9974790 | 2.7501550 | -0.7028520 |
| C | -0.9974790 | 2.7501550 | 0.7028520  |
| H | -3.8682930 | 4.4836670 | 1.2413370  |
| H | -3.8682930 | 4.4836670 | -1.2413370 |
| H | 4.1428250  | 4.8977710 | -1.2408330 |
| H | 4.1428250  | 4.8977710 | 1.2408330  |
| H | -2.0238340 | 3.3756240 | -2.4925220 |
| H | -2.0238340 | 3.3756240 | 2.4925220  |
| H | 2.4019580  | 3.6341050 | -2.4943240 |
| H | 2.4019580  | 3.6341050 | 2.4943240  |
| C | 0.2611430  | 2.1446620 | -1.3026450 |
| C | 0.2611430  | 2.1446620 | 1.3026450  |



|    |            |            |            |
|----|------------|------------|------------|
| C  | 0.4592010  | 0.6685580  | -0.7778510 |
| C  | 0.4592010  | 0.6685580  | 0.7778510  |
| C  | 1.8763740  | 0.2205810  | -1.1453770 |
| C  | 1.8763740  | 0.2205810  | 1.1453770  |
| O  | 2.6217470  | -0.0204730 | 0.0000000  |
| O  | 2.3444400  | 0.0737990  | -2.2395550 |
| O  | 2.3444400  | 0.0737990  | 2.2395550  |
| H  | 0.2663690  | 2.1602930  | -2.3959100 |
| H  | 0.2663690  | 2.1602930  | 2.3959100  |
| C  | -4.3355300 | -0.0051460 | 0.6983050  |
| C  | -4.3355300 | -0.0051460 | -0.6983050 |
| C  | -1.9321930 | -0.1948010 | -0.7027920 |
| C  | -1.9321930 | -0.1948010 | 0.7027920  |
| C  | -3.1293770 | -0.0997830 | -1.4052610 |
| C  | -3.1293770 | -0.0997830 | 1.4052610  |
| C  | -0.5542420 | -0.4220960 | -1.3054910 |
| C  | -0.5542420 | -0.4220960 | 1.3054910  |
| C  | -0.0848370 | -1.7442250 | -0.7040330 |
| C  | -0.0848370 | -1.7442250 | 0.7040330  |
| C  | 0.6842000  | -4.0479370 | -0.6975510 |
| C  | 0.6842000  | -4.0479370 | 0.6975510  |
| C  | 0.2977330  | -2.8938500 | -1.3774460 |
| C  | 0.2977330  | -2.8938500 | 1.3774460  |
| H  | -5.2746710 | 0.0625730  | 1.2411830  |
| H  | -5.2746710 | 0.0625730  | -1.2411830 |
| H  | -3.1299180 | -0.1090750 | -2.4930610 |
| H  | -3.1299180 | -0.1090750 | 2.4930610  |
| H  | -0.5580340 | -0.4438530 | -2.3968950 |
| H  | -0.5580340 | -0.4438530 | 2.3968950  |
| H  | 0.9763990  | -4.9284570 | -1.2603130 |
| H  | 0.9763990  | -4.9284570 | 1.2603130  |
| Br | 0.2864170  | -2.9076920 | 3.4358920  |
| Br | 0.2864170  | -2.9076920 | -3.4358920 |

55

TS2d B3LYP/AVDZ' Optimized Geometry

|   |            |            |            |
|---|------------|------------|------------|
| C | 1.1141770  | -3.4463620 | 0.6966440  |
| C | 1.1141770  | -3.4463620 | -0.6966440 |
| C | -4.8179900 | -1.1429690 | -0.6979710 |
| C | -4.8179900 | -1.1429690 | 0.6979710  |
| C | 0.4716510  | -2.4142100 | -1.3905900 |
| C | 0.4716510  | -2.4142100 | 1.3905900  |
| C | -3.6347140 | -0.8795670 | -1.4104310 |
| C | -3.6347140 | -0.8795670 | 1.4104310  |
| C | -2.4653220 | -0.6186580 | -0.7047630 |

|    |            |            |            |
|----|------------|------------|------------|
| C  | -2.4653220 | -0.6186580 | 0.7047630  |
| C  | -0.1797900 | -1.3892490 | -0.7080810 |
| C  | -0.1797900 | -1.3892490 | 0.7080810  |
| H  | 1.6093510  | -4.2492690 | 1.2429340  |
| H  | 1.6093510  | -4.2492690 | -1.2429340 |
| H  | -5.7429020 | -1.3430620 | -1.2432190 |
| H  | -5.7429020 | -1.3430620 | 1.2432190  |
| Br | 0.4932390  | -2.4721430 | -3.3114420 |
| Br | 0.4932390  | -2.4721430 | 3.3114420  |
| H  | -3.6355640 | -0.8740090 | -2.5027060 |
| H  | -3.6355640 | -0.8740090 | 2.5027060  |
| C  | -1.0773440 | -0.3121280 | -1.3070330 |
| C  | -1.0773440 | -0.3121280 | 1.3070330  |
| C  | -0.7232580 | 1.0559650  | -0.7076930 |
| C  | -0.7232580 | 1.0559650  | 0.7076930  |
| C  | -1.4809930 | 2.2574900  | -1.1408510 |
| C  | -1.4809930 | 2.2574900  | 1.1408510  |
| O  | -1.8021310 | 3.0025240  | 0.0000000  |
| O  | -1.8308130 | 2.6089100  | -2.2362300 |
| O  | -1.8308130 | 2.6089100  | 2.2362300  |
| H  | -1.0820760 | -0.3168850 | -2.4005780 |
| H  | -1.0820760 | -0.3168850 | 2.4005780  |
| C  | 3.8114000  | -0.8645630 | 0.7065270  |
| C  | 3.8114000  | -0.8645630 | -0.7065270 |
| C  | 2.1724940  | 0.9225880  | 0.7124760  |
| C  | 2.1724940  | 0.9225880  | -0.7124760 |
| C  | 2.9831390  | -0.0033310 | -1.4086600 |
| C  | 2.9831390  | -0.0033310 | 1.4086600  |
| C  | 1.3425270  | 1.8999370  | -1.3636660 |
| C  | 1.3425270  | 1.8999370  | 1.3636660  |
| C  | 0.8244200  | 5.5733710  | -0.7064560 |
| C  | 0.8244200  | 5.5733710  | 0.7064560  |
| C  | 1.1919100  | 3.1758430  | -0.7130760 |
| C  | 1.1919100  | 3.1758430  | 0.7130760  |
| C  | 0.9831800  | 4.3897060  | -1.4092080 |
| C  | 0.9831800  | 4.3897060  | 1.4092080  |
| H  | 4.4667380  | -1.5503510 | 1.2477830  |
| H  | 4.4667380  | -1.5503510 | -1.2477830 |
| H  | 2.9752680  | -0.0097900 | -2.5007680 |
| H  | 2.9752680  | -0.0097900 | 2.5007680  |
| H  | 1.2603040  | 1.8670960  | -2.4534500 |
| H  | 1.2603040  | 1.8670960  | 2.4534500  |
| H  | 0.6874520  | 6.5119930  | -1.2473710 |
| H  | 0.6874520  | 6.5119930  | 1.2473710  |
| H  | 0.9601790  | 4.3847100  | 2.5007820  |

|                                     |            |            |            |
|-------------------------------------|------------|------------|------------|
| H                                   | 0.9601790  | 4.3847100  | -2.5007820 |
| 55                                  |            |            |            |
| TS3d B3LYP/AVDZ' Optimized Geometry |            |            |            |
| C                                   | 4.2707420  | -0.4228390 | 0.6989640  |
| C                                   | 4.2707420  | -0.4228390 | -0.6989640 |
| C                                   | -0.9104890 | -4.0728700 | -0.6956570 |
| C                                   | -0.9104890 | -4.0728700 | 0.6956570  |
| C                                   | 3.0610620  | -0.3808850 | -1.4069210 |
| C                                   | 3.0610620  | -0.3808850 | 1.4069210  |
| C                                   | -0.4767570 | -2.9352210 | -1.3955210 |
| C                                   | -0.4767570 | -2.9352210 | 1.3955210  |
| C                                   | -0.0600540 | -1.8002570 | -0.7092250 |
| C                                   | -0.0600540 | -1.8002570 | 0.7092250  |
| C                                   | 1.8588980  | -0.3413520 | -0.7035340 |
| C                                   | 1.8588980  | -0.3413520 | 0.7035340  |
| H                                   | 5.2161790  | -0.4672360 | 1.2442120  |
| H                                   | 5.2161790  | -0.4672360 | -1.2442120 |
| H                                   | -1.2446290 | -4.9551300 | -1.2419130 |
| H                                   | -1.2446290 | -4.9551300 | 1.2419130  |
| H                                   | 3.0596180  | -0.4005870 | -2.4994100 |
| H                                   | 3.0596180  | -0.4005870 | 2.4994100  |
| Br                                  | -0.4612840 | -3.0062160 | -3.3132390 |
| Br                                  | -0.4612840 | -3.0062160 | 3.3132390  |
| C                                   | 0.4659970  | -0.4746940 | -1.3066980 |
| C                                   | 0.4659970  | -0.4746940 | 1.3066980  |
| C                                   | -0.4765410 | 0.5789870  | -0.7082660 |
| C                                   | -0.4765410 | 0.5789870  | 0.7082660  |
| C                                   | -1.8975120 | 0.6261280  | -1.1416160 |
| C                                   | -1.8975120 | 0.6261280  | 1.1416160  |
| O                                   | -2.6946440 | 0.7722070  | 0.0000000  |
| O                                   | -2.3852830 | 0.5411640  | -2.2369290 |
| O                                   | -2.3852830 | 0.5411640  | 2.2369290  |
| H                                   | 0.4636970  | -0.4865060 | -2.4005940 |
| H                                   | 0.4636970  | -0.4865060 | 2.4005940  |
| C                                   | 3.6432600  | 3.2913780  | 0.7064190  |
| C                                   | 3.6432600  | 3.2913780  | -0.7064190 |
| C                                   | 1.2480470  | 2.9108880  | 0.7123000  |
| C                                   | 1.2480470  | 2.9108880  | -0.7123000 |
| C                                   | 2.4678860  | 3.0750210  | -1.4073770 |
| C                                   | 2.4678860  | 3.0750210  | 1.4073770  |
| C                                   | -0.0258930 | 2.7583790  | -1.3625680 |
| C                                   | -0.0258930 | 2.7583790  | 1.3625680  |
| C                                   | -3.3657390 | 4.3757190  | -0.7062850 |
| C                                   | -3.3657390 | 4.3757190  | 0.7062850  |

|   |            |           |            |
|---|------------|-----------|------------|
| C | -1.1698910 | 3.3460200 | -0.7129720 |
| C | -1.1698910 | 3.3460200 | 0.7129720  |
| C | -2.2937990 | 3.8489890 | -1.4092330 |
| C | -2.2937990 | 3.8489890 | 1.4092330  |
| H | 4.5771770  | 3.4582610 | 1.2472160  |
| H | 4.5771770  | 3.4582610 | -1.2472160 |
| H | 2.4677710  | 3.0662470 | -2.4999420 |
| H | 2.4677710  | 3.0662470 | 2.4999420  |
| H | -0.0448520 | 2.6725760 | -2.4525600 |
| H | -0.0448520 | 2.6725760 | 2.4525600  |
| H | -4.2217110 | 4.7843870 | -1.2472390 |
| H | -4.2217110 | 4.7843870 | 1.2472390  |
| H | -2.3027580 | 3.8270410 | 2.5007880  |
| H | -2.3027580 | 3.8270410 | -2.5007880 |

|                                       |            |            |            |
|---------------------------------------|------------|------------|------------|
| 31                                    |            |            |            |
| 1e B3LYP/6-31+G(d) Optimized Geometry |            |            |            |
| C                                     | -3.8314270 | -1.4982650 | 0.6975880  |
| C                                     | -3.8314270 | -1.4982650 | -0.6975880 |
| C                                     | 0.5831970  | 3.3525510  | -0.6951930 |
| C                                     | 0.5831970  | 3.3525510  | 0.6951930  |
| C                                     | -2.6700920 | -1.1560810 | -1.4086970 |
| C                                     | -2.6700920 | -1.1560810 | 1.4086970  |
| C                                     | 0.3524570  | 2.1602920  | -1.3952310 |
| C                                     | 0.3524570  | 2.1602920  | 1.3952310  |
| C                                     | 0.1275250  | 0.9752880  | -0.7055810 |
| C                                     | 0.1275250  | 0.9752880  | 0.7055810  |
| C                                     | -1.5210960 | -0.8218510 | -0.7028180 |
| C                                     | -1.5210960 | -0.8218510 | 0.7028180  |
| H                                     | -4.7338550 | -1.7660400 | 1.2403640  |
| H                                     | -4.7338550 | -1.7660400 | -1.2403640 |
| H                                     | 0.7625470  | 4.2721320  | -1.2424100 |
| H                                     | 0.7625470  | 4.2721320  | 1.2424100  |
| H                                     | -2.6704040 | -1.1549010 | -2.4959400 |
| H                                     | -2.6704040 | -1.1549010 | 2.4959400  |
| Cl                                    | 0.3528920  | 2.1991410  | -3.1514360 |
| Cl                                    | 0.3528920  | 2.1991410  | 3.1514360  |
| C                                     | -0.1678260 | -0.4091130 | -1.3136640 |
| C                                     | -0.1678260 | -0.4091130 | 1.3136640  |
| C                                     | 0.8411910  | -1.3302110 | -0.6698700 |
| C                                     | 0.8411910  | -1.3302110 | 0.6698700  |
| C                                     | 1.8616470  | -2.2896860 | -1.1455550 |
| C                                     | 1.8616470  | -2.2896860 | 1.1455550  |
| O                                     | 2.4550960  | -2.8429940 | 0.0000000  |

|   |            |            |            |
|---|------------|------------|------------|
| O | 2.1908210  | -2.6060030 | -2.2549280 |
| O | 2.1908210  | -2.6060030 | 2.2549280  |
| H | -0.1578580 | -0.4141260 | -2.4022970 |
| H | -0.1578580 | -0.4141260 | 2.4022970  |

55

2e B3LYP/6-31+G(d) Optimized Geometry

|   |            |            |            |
|---|------------|------------|------------|
| C | -4.1637080 | 0.0097150  | 0.6982380  |
| C | -4.1637080 | 0.0097150  | -0.6982380 |
| C | -0.3668120 | 5.2570410  | -0.6984060 |
| C | -0.3668120 | 5.2570410  | 0.6984060  |
| C | -3.0291310 | 0.4316160  | -1.4055740 |
| C | -3.0291310 | 0.4316160  | 1.4055740  |
| C | -0.4474030 | 4.0502810  | -1.4069970 |
| C | -0.4474030 | 4.0502810  | 1.4069970  |
| C | -0.5385760 | 2.8525290  | -0.7038650 |
| C | -0.5385760 | 2.8525290  | 0.7038650  |
| C | -1.9047810 | 0.8543710  | -0.7031130 |
| C | -1.9047810 | 0.8543710  | 0.7031130  |
| H | -5.0478670 | -0.3135890 | 1.2415850  |
| H | -5.0478670 | -0.3135890 | -1.2415850 |
| H | -0.2979730 | 6.1961710  | -1.2409550 |
| H | -0.2979730 | 6.1961710  | 1.2409550  |
| H | -3.0313510 | 0.4360210  | -2.4932360 |
| H | -3.0313510 | 0.4360210  | 2.4932360  |
| H | -0.4330670 | 4.0487750  | -2.4943180 |
| H | -0.4330670 | 4.0487750  | 2.4943180  |
| C | -0.6419340 | 1.4503370  | -1.3028180 |
| C | -0.6419340 | 1.4503370  | 1.3028180  |
| C | 0.6244000  | 0.6669480  | -0.7770740 |
| C | 0.6244000  | 0.6669480  | 0.7770740  |
| C | 1.8723890  | 1.4737130  | -1.1448560 |
| C | 1.8723890  | 1.4737130  | 1.1448560  |
| O | 2.5272410  | 1.9026540  | 0.0000000  |
| O | 2.2848960  | 1.7379340  | -2.2396390 |
| O | 2.2848960  | 1.7379340  | 2.2396390  |
| H | -0.6518550 | 1.4629960  | -2.3958930 |
| H | -0.6518550 | 1.4629960  | 2.3958930  |
| C | -1.9181260 | -3.4609060 | 0.6958700  |
| C | -1.9181260 | -3.4609060 | -0.6958700 |
| C | -0.2297650 | -1.7217010 | -0.7051770 |
| C | -0.2297650 | -1.7217010 | 0.7051770  |
| C | -1.0759710 | -2.5867980 | -1.3906810 |
| C | -1.0759710 | -2.5867980 | 1.3906810  |
| C | 0.8282690  | -0.8069920 | -1.3011930 |

|    |            |            |            |
|----|------------|------------|------------|
| C  | 0.8282690  | -0.8069920 | 1.3011930  |
| C  | 2.1483190  | -1.2907620 | -0.7030410 |
| C  | 2.1483190  | -1.2907620 | 0.7030410  |
| C  | 4.4096240  | -2.1213580 | -0.6985110 |
| C  | 4.4096240  | -2.1213580 | 0.6985110  |
| C  | 3.2766540  | -1.7000860 | -1.4079930 |
| C  | 3.2766540  | -1.7000860 | 1.4079930  |
| H  | -2.5682700 | -4.1354990 | 1.2431150  |
| H  | -2.5682700 | -4.1354990 | -1.2431150 |
| Cl | -1.1075400 | -2.6118170 | -3.1505570 |
| Cl | -1.1075400 | -2.6118170 | 3.1505570  |
| H  | 0.8357890  | -0.8226110 | -2.3916420 |
| H  | 0.8357890  | -0.8226110 | 2.3916420  |
| H  | 5.2939200  | -2.4453900 | -1.2406840 |
| H  | 5.2939200  | -2.4453900 | 1.2406840  |
| H  | 3.2800370  | -1.6877660 | 2.4951050  |
| H  | 3.2800370  | -1.6877660 | -2.4951050 |

55

3e B3LYP/6-31+G(d) Optimized Geometry

|   |            |            |            |
|---|------------|------------|------------|
| C | 3.2458780  | -3.4102300 | 0.6983280  |
| C | 3.2458780  | -3.4102300 | -0.6983280 |
| C | -3.1621600 | -4.1730980 | -0.6983890 |
| C | -3.1621600 | -4.1730980 | 0.6983890  |
| C | 2.1716720  | -2.8523650 | -1.4044300 |
| C | 2.1716720  | -2.8523650 | 1.4044300  |
| C | -2.2255840 | -3.4077620 | -1.4068850 |
| C | -2.2255840 | -3.4077620 | 1.4068850  |
| C | -1.2879390 | -2.6568900 | -0.7038400 |
| C | -1.2879390 | -2.6568900 | 0.7038400  |
| C | 1.1039920  | -2.3011550 | -0.7028010 |
| C | 1.1039920  | -2.3011550 | 0.7028010  |
| H | 4.0790420  | -3.8488770 | 1.2413280  |
| H | 4.0790420  | -3.8488770 | -1.2413280 |
| H | -3.8951240 | -4.7641670 | -1.2410230 |
| H | -3.8951240 | -4.7641670 | 1.2410230  |
| H | 2.1678020  | -2.8603320 | -2.4924560 |
| H | 2.1678020  | -2.8603320 | 2.4924560  |
| H | -2.2346210 | -3.3961410 | -2.4941850 |
| H | -2.2346210 | -3.3961410 | 2.4941850  |
| C | -0.1902970 | -1.7771800 | -1.3026140 |
| C | -0.1902970 | -1.7771800 | 1.3026140  |
| C | -0.4834450 | -0.3170090 | -0.7770070 |
| C | -0.4834450 | -0.3170090 | 0.7770070  |
| C | -1.9272480 | 0.0367370  | -1.1453050 |

|                                         |            |            |            |    |            |            |            |
|-----------------------------------------|------------|------------|------------|----|------------|------------|------------|
| C                                       | -1.9272480 | 0.0367370  | 1.1453050  | H  | 2.1711580  | -4.3578810 | 1.2437860  |
| O                                       | -2.6861670 | 0.2310660  | 0.0000000  | H  | 2.1711580  | -4.3578810 | -1.2437860 |
| O                                       | -2.4051800 | 0.1470760  | -2.2393670 | H  | -5.4482920 | -2.2891890 | -1.2402970 |
| O                                       | -2.4051800 | 0.1470760  | 2.2393670  | H  | -5.4482920 | -2.2891890 | 1.2402970  |
| H                                       | -0.1947630 | -1.7926690 | -2.3958850 | Cl | 0.8635060  | -2.7039130 | -3.1500580 |
| H                                       | -0.1947630 | -1.7926690 | 2.3958850  | Cl | 0.8635060  | -2.7039130 | 3.1500580  |
| C                                       | 4.2587390  | 0.6667830  | 0.6983830  | H  | -3.4106210 | -1.5933520 | -2.4960790 |
| C                                       | 4.2587390  | 0.6667830  | -0.6983830 | H  | -3.4106210 | -1.5933520 | 2.4960790  |
| C                                       | 1.8489970  | 0.6975000  | -0.7022050 | C  | -0.9301540 | -0.7559620 | -1.3073280 |
| C                                       | 1.8489970  | 0.6975000  | 0.7022050  | C  | -0.9301540 | -0.7559620 | 1.3073280  |
| C                                       | 3.0491990  | 0.6820250  | -1.4057540 | C  | -0.7315150 | 0.6428940  | -0.7070190 |
| C                                       | 3.0491990  | 0.6820250  | 1.4057540  | C  | -0.7315150 | 0.6428940  | 0.7070190  |
| C                                       | 0.4583920  | 0.8353040  | -1.3007790 | C  | -1.6181830 | 1.7502250  | -1.1408650 |
| C                                       | 0.4583920  | 0.8353040  | 1.3007790  | C  | -1.6181830 | 1.7502250  | 1.1408650  |
| C                                       | -0.0929550 | 2.1321450  | -0.7063140 | O  | -2.0224870 | 2.4520200  | 0.0000000  |
| C                                       | -0.0929550 | 2.1321450  | 0.7063140  | O  | -2.0014410 | 2.0609080  | -2.2386860 |
| C                                       | -0.9829330 | 4.3850840  | -0.6957040 | O  | -2.0014410 | 2.0609080  | 2.2386860  |
| C                                       | -0.9829330 | 4.3850840  | 0.6957040  | H  | -0.9357040 | -0.7597470 | -2.3967200 |
| C                                       | -0.5341890 | 3.2584910  | -1.3951700 | H  | -0.9357040 | -0.7597470 | 2.3967200  |
| C                                       | -0.5341890 | 3.2584910  | 1.3951700  | C  | 3.9791180  | -0.7664470 | 0.7059150  |
| H                                       | 5.2004610  | 0.6607150  | 1.2409860  | C  | 3.9791180  | -0.7664470 | -0.7059150 |
| H                                       | 5.2004610  | 0.6607150  | -1.2409860 | C  | 2.1601380  | 0.8337570  | 0.7119700  |
| H                                       | 3.0490250  | 0.6919230  | -2.4934760 | C  | 2.1601380  | 0.8337570  | -0.7119700 |
| H                                       | 3.0490250  | 0.6919230  | 2.4934760  | C  | 3.0639460  | 0.0002830  | -1.4071930 |
| H                                       | 0.4630070  | 0.8548590  | -2.3915220 | C  | 3.0639460  | 0.0002830  | 1.4071930  |
| H                                       | 0.4630070  | 0.8548590  | 2.3915220  | C  | 1.2266270  | 1.7119840  | -1.3618730 |
| H                                       | -1.3244120 | 5.2579880  | -1.2421610 | C  | 1.2266270  | 1.7119840  | 1.3618730  |
| H                                       | -1.3244120 | 5.2579880  | 1.2421610  | C  | 0.3005400  | 5.3012790  | -0.7058470 |
| Cl                                      | -0.5191190 | 3.3120910  | 3.1506350  | C  | 0.3005400  | 5.3012790  | 0.7058470  |
| Cl                                      | -0.5191190 | 3.3120910  | -3.1506350 | C  | 0.9360960  | 2.9628650  | -0.7125000 |
|                                         |            |            |            | C  | 0.9360960  | 2.9628650  | 0.7125000  |
|                                         |            |            |            | C  | 0.5920210  | 4.1442290  | -1.4079230 |
| 55                                      |            |            |            | C  | 0.5920210  | 4.1442290  | 1.4079230  |
| TS2e B3LYP/6-31+G(d) Optimized Geometry |            |            |            | H  | 4.6996950  | -1.3761660 | 1.2445100  |
| C                                       | 1.5927160  | -3.6214100 | 0.6957550  | H  | 4.6996950  | -1.3761660 | -1.2445100 |
| C                                       | 1.5927160  | -3.6214100 | -0.6957550 | H  | 3.0556860  | -0.0076500 | -2.4943180 |
| C                                       | -4.5552710 | -1.9912510 | -0.6973460 | H  | 3.0556860  | -0.0076500 | 2.4943180  |
| C                                       | -4.5552710 | -1.9912510 | 0.6973460  | H  | 1.1436120  | 1.6688340  | -2.4461420 |
| C                                       | 0.8412300  | -2.6681520 | -1.3899560 | H  | 1.1436120  | 1.6688340  | 2.4461420  |
| C                                       | 0.8412300  | -2.6681520 | 1.3899560  | H  | 0.0582560  | 6.2135970  | -1.2439810 |
| C                                       | -3.4086610 | -1.5999230 | -1.4088390 | H  | 0.0582560  | 6.2135970  | 1.2439810  |
| C                                       | -3.4086610 | -1.5999230 | 1.4088390  | H  | 0.5690700  | 4.1360860  | 2.4944410  |
| C                                       | -2.2761660 | -1.2128840 | -0.7041840 | H  | 0.5690700  | 4.1360860  | -2.4944410 |
| C                                       | -2.2761660 | -1.2128840 | 0.7041840  |    |            |            |            |
| C                                       | 0.0806890  | -1.7253780 | -0.7059040 |    |            |            |            |
| C                                       | 0.0806890  | -1.7253780 | 0.7059040  |    |            |            |            |

55  
 TS3e B3LYP/6-31+G(d) Optimized Geometry

|    |            |            |            |
|----|------------|------------|------------|
| C  | -4.1006880 | 1.2537950  | 0.6983310  |
| C  | -4.1006880 | 1.2537950  | -0.6983310 |
| C  | 1.4161100  | 4.3539990  | -0.6947330 |
| C  | 1.4161100  | 4.3539990  | 0.6947330  |
| C  | -2.9026360 | 1.0873490  | -1.4053400 |
| C  | -2.9026360 | 1.0873490  | 1.4053400  |
| C  | 0.8717760  | 3.2669130  | -1.3948480 |
| C  | 0.8717760  | 3.2669130  | 1.3948480  |
| C  | 0.3438850  | 2.1823520  | -0.7071780 |
| C  | 0.3438850  | 2.1823520  | 0.7071780  |
| C  | -1.7121950 | 0.9249090  | -0.7029640 |
| C  | -1.7121950 | 0.9249090  | 0.7029640  |
| H  | -5.0319190 | 1.3937860  | 1.2412120  |
| H  | -5.0319190 | 1.3937860  | -1.2412120 |
| H  | 1.8349040  | 5.1917610  | -1.2424890 |
| H  | 1.8349040  | 5.1917610  | 1.2424890  |
| H  | -2.8994620 | 1.1061320  | -2.4929260 |
| H  | -2.8994620 | 1.1061320  | 2.4929260  |
| Cl | 0.8633300  | 3.3203810  | -3.1515120 |
| Cl | 0.8633300  | 3.3203810  | 3.1515120  |
| C  | -0.3126960 | 0.9178450  | -1.3066690 |
| C  | -0.3126960 | 0.9178450  | 1.3066690  |
| C  | 0.5192750  | -0.2253380 | -0.7072190 |
| C  | 0.5192750  | -0.2253380 | 0.7072190  |
| C  | 1.9256490  | -0.4152700 | -1.1415920 |
| C  | 1.9256490  | -0.4152700 | 1.1415920  |
| O  | 2.7040820  | -0.6369030 | 0.0000000  |
| O  | 2.4171160  | -0.3832140 | -2.2395080 |
| O  | 2.4171160  | -0.3832140 | 2.2395080  |
| H  | -0.3083430 | 0.9284080  | -2.3964110 |
| H  | -0.3083430 | 0.9284080  | 2.3964110  |
| C  | -3.8517760 | -2.5119170 | 0.7058610  |
| C  | -3.8517760 | -2.5119170 | -0.7058610 |
| C  | -1.4328510 | -2.3736080 | 0.7118470  |
| C  | -1.4328510 | -2.3736080 | -0.7118470 |
| C  | -2.6618290 | -2.4146970 | -1.4061400 |
| C  | -2.6618290 | -2.4146970 | 1.4061400  |
| C  | -0.1516820 | -2.3528440 | -1.3612690 |
| C  | -0.1516820 | -2.3528440 | 1.3612690  |
| C  | 3.0122770  | -4.2845190 | -0.7058330 |
| C  | 3.0122770  | -4.2845190 | 0.7058330  |
| C  | 0.9270120  | -3.0502060 | -0.7123840 |
| C  | 0.9270120  | -3.0502060 | 0.7123840  |

|   |            |            |            |
|---|------------|------------|------------|
| C | 1.9969310  | -3.6576400 | -1.4077910 |
| C | 1.9969310  | -3.6576400 | 1.4077910  |
| H | -4.7932220 | -2.5835870 | 1.2438730  |
| H | -4.7932220 | -2.5835870 | -1.2438730 |
| H | -2.6605370 | -2.4068910 | -2.4936700 |
| H | -2.6605370 | -2.4068910 | 2.4936700  |
| H | -0.1213970 | -2.2659450 | -2.4457720 |
| H | -0.1213970 | -2.2659450 | 2.4457720  |
| H | 3.8222100  | -4.7691660 | -1.2440840 |
| H | 3.8222100  | -4.7691660 | 1.2440840  |
| H | 2.0085240  | -3.6343910 | 2.4942390  |
| H | 2.0085240  | -3.6343910 | -2.4942390 |

55  
 2f B3LYP/6-31+G(d) Optimized Geometry

|   |            |           |            |
|---|------------|-----------|------------|
| C | -4.1566430 | 0.8347600 | 0.6983310  |
| C | -4.1566430 | 0.8347600 | -0.6983310 |
| C | 0.7566830  | 5.0485180 | -0.6983790 |
| C | 0.7566830  | 5.0485180 | 0.6983790  |
| C | -2.9544460 | 0.9769520 | -1.4055210 |
| C | -2.9544460 | 0.9769520 | 1.4055210  |
| C | 0.3981900  | 3.8934060 | -1.4069180 |
| C | 0.3981900  | 3.8934060 | 1.4069180  |
| C | 0.0317870  | 2.7493300 | -0.7038070 |
| C | 0.0317870  | 2.7493300 | 0.7038070  |
| C | -1.7622330 | 1.1241390 | -0.7031740 |
| C | -1.7622330 | 1.1241390 | 0.7031740  |
| H | -5.0920920 | 0.7281710 | 1.2414930  |
| H | -5.0920920 | 0.7281710 | -1.2414930 |
| H | 1.0408160  | 5.9462490 | -1.2409700 |
| H | 1.0408160  | 5.9462490 | 1.2409700  |
| H | -2.9553570 | 0.9821070 | -2.4934060 |
| H | -2.9553570 | 0.9821070 | 2.4934060  |
| H | 0.4111620  | 3.8889860 | -2.4942510 |
| H | 0.4111620  | 3.8889860 | 2.4942510  |
| C | -0.3949550 | 1.4097720 | -1.3028630 |
| C | -0.3949550 | 1.4097720 | 1.3028630  |
| C | 0.6537680  | 0.3528060 | -0.7780190 |
| C | 0.6537680  | 0.3528060 | 0.7780190  |
| C | 2.0555930  | 0.8468720 | -1.1447430 |
| C | 2.0555930  | 0.8468720 | 1.1447430  |
| O | 2.7937930  | 1.1074280 | 0.0000000  |
| O | 2.5181070  | 1.0088650 | -2.2394780 |
| O | 2.5181070  | 1.0088650 | 2.2394780  |

|   |            |            |            |
|---|------------|------------|------------|
| H | -0.4017240 | 1.4250860  | -2.3960290 |
| H | -0.4017240 | 1.4250860  | 2.3960290  |
| C | -2.7880750 | -3.0568310 | 0.6978540  |
| C | -2.7880750 | -3.0568310 | -0.6978540 |
| C | -0.7297410 | -1.7651020 | -0.7027150 |
| C | -0.7297410 | -1.7651020 | 0.7027150  |
| C | -1.7598430 | -2.4040020 | -1.3731840 |
| C | -1.7598430 | -2.4040020 | 1.3731840  |
| C | 0.5084380  | -1.1282960 | -1.3059170 |
| C | 0.5084380  | -1.1282960 | 1.3059170  |
| C | 1.6802830  | -1.9045020 | -0.7036870 |
| C | 1.6802830  | -1.9045020 | 0.7036870  |
| C | 3.6929000  | -3.2298620 | -0.6984390 |
| C | 3.6929000  | -3.2298620 | 0.6984390  |
| C | 2.6858120  | -2.5607310 | -1.4075180 |
| C | 2.6858120  | -2.5607310 | 1.4075180  |
| H | -3.5722970 | -3.5517490 | 1.2612910  |
| H | -3.5722970 | -3.5517490 | -1.2612910 |
| F | -1.7708550 | -2.4000720 | -2.7357940 |
| F | -1.7708550 | -2.4000720 | 2.7357940  |
| H | 0.5093280  | -1.1474320 | -2.3971260 |
| H | 0.5093280  | -1.1474320 | 2.3971260  |
| H | 4.4801510  | -3.7464140 | -1.2409740 |
| H | 4.4801510  | -3.7464140 | 1.2409740  |
| H | 2.6925680  | -2.5483680 | 2.4946770  |
| H | 2.6925680  | -2.5483680 | -2.4946770 |

55

3f B3LYP/6-31+G(d) Optimized Geometry

|   |            |            |            |
|---|------------|------------|------------|
| C | 3.4030350  | -2.9941820 | 0.6983220  |
| C | 3.4030350  | -2.9941820 | -0.6983220 |
| C | -2.9427500 | -4.1489870 | -0.6983560 |
| C | -2.9427500 | -4.1489870 | 0.6983560  |
| C | 2.2969620  | -2.5024120 | -1.4044940 |
| C | 2.2969620  | -2.5024120 | 1.4044940  |
| C | -2.0564550 | -3.3262000 | -1.4069980 |
| C | -2.0564550 | -3.3262000 | 1.4069980  |
| C | -1.1680880 | -2.5175210 | -0.7038430 |
| C | -1.1680880 | -2.5175210 | 0.7038430  |
| C | 1.1976880  | -2.0172410 | -0.7028520 |
| C | 1.1976880  | -2.0172410 | 0.7028520  |
| H | 4.2612570  | -3.3814940 | 1.2413370  |
| H | 4.2612570  | -3.3814940 | -1.2413370 |
| H | -3.6367300 | -4.7855220 | -1.2408330 |
| H | -3.6367300 | -4.7855220 | 1.2408330  |

|   |            |            |            |
|---|------------|------------|------------|
| H | 2.2936640  | -2.5106510 | -2.4925220 |
| H | 2.2936640  | -2.5106510 | 2.4925220  |
| H | -2.0659460 | -3.3157920 | -2.4943240 |
| H | -2.0659460 | -3.3157920 | 2.4943240  |
| C | -0.1262870 | -1.5724470 | -1.3026450 |
| C | -0.1262870 | -1.5724470 | 1.3026450  |
| C | -0.5058060 | -0.1322820 | -0.7778510 |
| C | -0.5058060 | -0.1322820 | 0.7778510  |
| C | -1.9675820 | 0.1365560  | -1.1453770 |
| C | -1.9675820 | 0.1365560  | 1.1453770  |
| O | -2.7370880 | 0.2833480  | 0.0000000  |
| O | -2.4502340 | 0.2241810  | -2.2395550 |
| O | -2.4502340 | 0.2241810  | 2.2395550  |
| H | -0.1295350 | -1.5886050 | -2.3959100 |
| H | -0.1295350 | -1.5886050 | 2.3959100  |
| C | 4.1684220  | 1.1306160  | 0.6983050  |
| C | 4.1684220  | 1.1306160  | -0.6983050 |
| C | 1.7601130  | 1.0208720  | -0.7027920 |
| C | 1.7601130  | 1.0208720  | 0.7027920  |
| C | 2.9598420  | 1.0749990  | -1.4052610 |
| C | 2.9598420  | 1.0749990  | 1.4052610  |
| C | 0.3646140  | 1.0755930  | -1.3054910 |
| C | 0.3646140  | 1.0755930  | 1.3054910  |
| C | -0.2650710 | 2.3293320  | -0.7040330 |
| C | -0.2650710 | 2.3293320  | 0.7040330  |
| C | -1.3137620 | 4.5199390  | -0.6975510 |
| C | -1.3137620 | 4.5199390  | 0.6975510  |
| C | -0.7872060 | 3.4226630  | -1.3774460 |
| C | -0.7872060 | 3.4226630  | 1.3774460  |
| H | 5.1087140  | 1.1798420  | 1.2411830  |
| H | 5.1087140  | 1.1798420  | -1.2411830 |
| H | 2.9592260  | 1.0842870  | -2.4930610 |
| H | 2.9592260  | 1.0842870  | 2.4930610  |
| H | 0.3656800  | 1.0976520  | -2.3968950 |
| H | 0.3656800  | 1.0976520  | 2.3968950  |
| H | -1.7128620 | 5.3574430  | -1.2603130 |
| H | -1.7128620 | 5.3574430  | 1.2603130  |
| F | -0.7776940 | 3.4378010  | 2.7358920  |
| F | -0.7776940 | 3.4378010  | -2.7358920 |

31

1f B3LYP/6-31+G(d) Optimized Geometry

|   |            |            |            |
|---|------------|------------|------------|
| C | -3.9319550 | -0.7530460 | 0.6974810  |
| C | -3.9319550 | -0.7530460 | -0.6974810 |
| C | 1.0939490  | 3.4653250  | -0.6970300 |

|   |            |            |            |   |            |            |            |
|---|------------|------------|------------|---|------------|------------|------------|
| C | 1.0939490  | 3.4653250  | 0.6970300  | H | -5.0628320 | -3.0806910 | -1.2404860 |
| C | -2.7350210 | -0.5694710 | -1.4083510 | H | -5.0628320 | -3.0806910 | 1.2404860  |
| C | -2.7350210 | -0.5694710 | 1.4083510  | F | 1.2323670  | -2.7184990 | -2.7361200 |
| C | 0.7039400  | 2.3107250  | -1.3773520 | F | 1.2323670  | -2.7184990 | 2.7361200  |
| C | 0.7039400  | 2.3107250  | 1.3773520  | H | -3.1215360 | -2.1495270 | -2.4956780 |
| C | 0.3218180  | 1.1640830  | -0.7033240 | H | -3.1215360 | -2.1495270 | 2.4956780  |
| C | 0.3218180  | 1.1640830  | 0.7033240  | C | -0.7556380 | -1.0268340 | -1.3117820 |
| C | -1.5512930 | -0.3915750 | -0.7034610 | C | -0.7556380 | -1.0268340 | 1.3117820  |
| C | -1.5512930 | -0.3915750 | 0.7034610  | C | -0.7254100 | 0.3850410  | -0.7075320 |
| H | -4.8619550 | -0.8977960 | 1.2404470  | C | -0.7254100 | 0.3850410  | 0.7075320  |
| H | -4.8619550 | -0.8977960 | -1.2404470 | C | -1.7353970 | 1.3811740  | -1.1407330 |
| H | 1.3925710  | 4.3433470  | -1.2602630 | C | -1.7353970 | 1.3811740  | 1.1407330  |
| H | 1.3925710  | 4.3433470  | 1.2602630  | O | -2.2193030 | 2.0311120  | 0.0000000  |
| H | -2.7354530 | -0.5683750 | -2.4956490 | O | -2.1521150 | 1.6450010  | -2.2386770 |
| H | -2.7354530 | -0.5683750 | 2.4956490  | O | -2.1521150 | 1.6450010  | 2.2386770  |
| F | 0.7009050  | 2.3192010  | -2.7365780 | H | -0.7578960 | -1.0334900 | -2.4019660 |
| F | 0.7009050  | 2.3192010  | 2.7365780  | H | -0.7578960 | -1.0334900 | 2.4019660  |
| C | -0.1549160 | -0.1624680 | -1.3180340 | C | 4.1177790  | -0.4577580 | 0.7059400  |
| C | -0.1549160 | -0.1624680 | 1.3180340  | C | 4.1177790  | -0.4577580 | -0.7059400 |
| C | 0.7211500  | -1.2102990 | -0.6702930 | C | 2.1212500  | 0.9154840  | 0.7120110  |
| C | 0.7211500  | -1.2102990 | 0.6702930  | C | 2.1212500  | 0.9154840  | -0.7120110 |
| C | 1.6053280  | -2.2968640 | -1.1452550 | C | 3.1171410  | 0.1938430  | -1.4068690 |
| C | 1.6053280  | -2.2968640 | 1.1452550  | C | 3.1171410  | 0.1938430  | 1.4068690  |
| O | 2.1194220  | -2.9248380 | 0.0000000  | C | 1.0922550  | 1.6788040  | -1.3620330 |
| O | 1.8907200  | -2.6527850 | -2.2548330 | C | 1.0922550  | 1.6788040  | 1.3620330  |
| O | 1.8907200  | -2.6527850 | 2.2548330  | C | -0.2563620 | 5.1313230  | -0.7058310 |
| H | -0.1447640 | -0.1668180 | -2.4074080 | C | -0.2563620 | 5.1313230  | 0.7058310  |
| H | -0.1447640 | -0.1668180 | 2.4074080  | C | 0.6560190  | 2.8863380  | -0.7124790 |

55

TS2f B3LYP/6-31+G(d) Optimized Geometry

|   |            |            |            |
|---|------------|------------|------------|
| C | 2.0823880  | -3.5786470 | 0.6977870  |
| C | 2.0823880  | -3.5786470 | -0.6977870 |
| C | -4.2109440 | -2.6804620 | -0.6972200 |
| C | -4.2109440 | -2.6804620 | 0.6972200  |
| C | 1.2259300  | -2.7133840 | -1.3731190 |
| C | 1.2259300  | -2.7133840 | 1.3731190  |
| C | -3.1180180 | -2.1568820 | -1.4083730 |
| C | -3.1180180 | -2.1568820 | 1.4083730  |
| C | -2.0380020 | -1.6401570 | -0.7048010 |
| C | -2.0380020 | -1.6401570 | 0.7048010  |
| C | 0.3607140  | -1.8633540 | -0.7033760 |
| C | 0.3607140  | -1.8633540 | 0.7033760  |
| H | 2.7347220  | -4.2378400 | 1.2612870  |
| H | 2.7347220  | -4.2378400 | -1.2612870 |

|   |            |            |            |
|---|------------|------------|------------|
| H | -5.0628320 | -3.0806910 | -1.2404860 |
| H | -5.0628320 | -3.0806910 | 1.2404860  |
| F | 1.2323670  | -2.7184990 | -2.7361200 |
| F | 1.2323670  | -2.7184990 | 2.7361200  |
| H | -3.1215360 | -2.1495270 | -2.4956780 |
| H | -3.1215360 | -2.1495270 | 2.4956780  |
| C | -0.7556380 | -1.0268340 | -1.3117820 |
| C | -0.7556380 | -1.0268340 | 1.3117820  |
| C | -0.7254100 | 0.3850410  | -0.7075320 |
| C | -0.7254100 | 0.3850410  | 0.7075320  |
| C | -1.7353970 | 1.3811740  | -1.1407330 |
| C | -1.7353970 | 1.3811740  | 1.1407330  |
| O | -2.2193030 | 2.0311120  | 0.0000000  |
| O | -2.1521150 | 1.6450010  | -2.2386770 |
| O | -2.1521150 | 1.6450010  | 2.2386770  |
| H | -0.7578960 | -1.0334900 | -2.4019660 |
| H | -0.7578960 | -1.0334900 | 2.4019660  |
| C | 4.1177790  | -0.4577580 | 0.7059400  |
| C | 4.1177790  | -0.4577580 | -0.7059400 |
| C | 2.1212500  | 0.9154840  | 0.7120110  |
| C | 2.1212500  | 0.9154840  | -0.7120110 |
| C | 3.1171410  | 0.1938430  | -1.4068690 |
| C | 3.1171410  | 0.1938430  | 1.4068690  |
| C | 1.0922550  | 1.6788040  | -1.3620330 |
| C | 1.0922550  | 1.6788040  | 1.3620330  |
| C | -0.2563620 | 5.1313230  | -0.7058310 |
| C | -0.2563620 | 5.1313230  | 0.7058310  |
| C | 0.6560190  | 2.8863380  | -0.7124790 |
| C | 0.6560190  | 2.8863380  | 0.7124790  |
| C | 0.1722850  | 4.0177610  | -1.4078430 |
| C | 0.1722850  | 4.0177610  | 1.4078430  |
| H | 4.9059760  | -0.9771710 | 1.2444550  |
| H | 4.9059760  | -0.9771710 | -1.2444550 |
| H | 3.1100810  | 0.1854170  | -2.4942860 |
| H | 3.1100810  | 0.1854170  | 2.4942860  |
| H | 1.0159770  | 1.6272880  | -2.4465040 |
| H | 1.0159770  | 1.6272880  | 2.4465040  |
| H | -0.6071790 | 6.0076340  | -1.2439890 |
| H | -0.6071790 | 6.0076340  | 1.2439890  |
| H | 0.1495680  | 4.0066800  | 2.4943530  |
| H | 0.1495680  | 4.0066800  | -2.4943530 |

55

TS3f B3LYP/6-31+G(d) Optimized Geometry

|   |            |           |           |
|---|------------|-----------|-----------|
| C | -3.8289890 | 1.9737940 | 0.6982830 |
|---|------------|-----------|-----------|

|   |            |            |            |   |            |            |            |
|---|------------|------------|------------|---|------------|------------|------------|
| C | -3.8289890 | 1.9737940  | -0.6982830 | H | -4.9973850 | -1.7583800 | -1.2436860 |
| C | 2.0387280  | 4.3450920  | -0.6966100 | H | -2.8595510 | -1.8516090 | -2.4937030 |
| C | 2.0387280  | 4.3450920  | 0.6966100  | H | -2.8595510 | -1.8516090 | 2.4937030  |
| C | -2.6618590 | 1.6551820  | -1.4049460 | H | -0.3213950 | -2.0273060 | -2.4456710 |
| C | -2.6618590 | 1.6551820  | 1.4049460  | H | -0.3213950 | -2.0273060 | 2.4456710  |
| C | 1.3594210  | 3.3317760  | -1.3773440 | H | 3.2648930  | -5.0216710 | -1.2439730 |
| C | 1.3594210  | 3.3317760  | 1.3773440  | H | 3.2648930  | -5.0216710 | 1.2439730  |
| C | 0.6950950  | 2.3221410  | -0.7049580 | H | 1.6148430  | -3.6605790 | 2.4945010  |
| C | 0.6950950  | 2.3221410  | 0.7049580  | H | 1.6148430  | -3.6605790 | -2.4945010 |
| C | -1.5018440 | 1.3410070  | -0.7034630 |   |            |            |            |
| C | -1.5018440 | 1.3410070  | 0.7034630  |   |            |            |            |
| H | -4.7344460 | 2.2321060  | 1.2413820  |   |            |            |            |
| H | -4.7344460 | 2.2321060  | -1.2413820 |   |            |            |            |
| H | 2.5562020  | 5.1143900  | -1.2604240 |   |            |            |            |
| H | 2.5562020  | 5.1143900  | 1.2604240  |   |            |            |            |
| H | -2.6562520 | 1.6743990  | -2.4925830 |   |            |            |            |
| H | -2.6562520 | 1.6743990  | 2.4925830  |   |            |            |            |
| F | 1.3505320  | 3.3521670  | -2.7367390 |   |            |            |            |
| F | 1.3505320  | 3.3521670  | 2.7367390  |   |            |            |            |
| C | -0.1148360 | 1.1570030  | -1.3110610 |   |            |            |            |
| C | -0.1148360 | 1.1570030  | 1.3110610  |   |            |            |            |
| C | 0.5656030  | -0.0819840 | -0.7077890 |   |            |            |            |
| C | 0.5656030  | -0.0819840 | 0.7077890  |   |            |            |            |
| C | 1.9374960  | -0.4450570 | -1.1411530 |   |            |            |            |
| C | 1.9374960  | -0.4450570 | 1.1411530  |   |            |            |            |
| O | 2.6818750  | -0.7643910 | 0.0000000  |   |            |            |            |
| O | 2.4298390  | -0.4703450 | -2.2389600 |   |            |            |            |
| O | 2.4298390  | -0.4703450 | 2.2389600  |   |            |            |            |
| H | -0.1077990 | 1.1688160  | -2.4013640 |   |            |            |            |
| H | -0.1077990 | 1.1688160  | 2.4013640  |   |            |            |            |
| C | -4.0543020 | -1.8059240 | 0.7058370  |   |            |            |            |
| C | -4.0543020 | -1.8059240 | -0.7058370 |   |            |            |            |
| C | -1.6372100 | -1.9731950 | 0.7118800  |   |            |            |            |
| C | -1.6372100 | -1.9731950 | -0.7118800 |   |            |            |            |
| C | -2.8616170 | -1.8594150 | -1.4061720 |   |            |            |            |
| C | -2.8616170 | -1.8594150 | 1.4061720  |   |            |            |            |
| C | -0.3626930 | -2.1106580 | -1.3612350 |   |            |            |            |
| C | -0.3626930 | -2.1106580 | 1.3612350  |   |            |            |            |
| C | 2.5258760  | -4.4344550 | -0.7058020 |   |            |            |            |
| C | 2.5258760  | -4.4344550 | 0.7058020  |   |            |            |            |
| C | 0.6198560  | -2.9383900 | -0.7123980 |   |            |            |            |
| C | 0.6198560  | -2.9383900 | 0.7123980  |   |            |            |            |
| C | 1.6012570  | -3.6801400 | -1.4079740 |   |            |            |            |
| C | 1.6012570  | -3.6801400 | 1.4079740  |   |            |            |            |
| H | -4.9973850 | -1.7583800 | 1.2436860  |   |            |            |            |



## M05-2X optimized Cartesian Coordinates

### Substituted Benzene Dimers

24

M05-2X/6-31+G(d) Benzene...Benzene

|   |             |             |             |
|---|-------------|-------------|-------------|
| C | 0.98556144  | -0.98556144 | -2.02500000 |
| C | -0.36074053 | -1.34630197 | -2.02500000 |
| C | 1.34630197  | 0.36074053  | -2.02500000 |
| C | -0.98556144 | 0.98556144  | -2.02500000 |
| C | 0.36074053  | 1.34630197  | -2.02500000 |
| C | -1.34630197 | -0.36074053 | -2.02500000 |
| H | 1.75143711  | -1.75143711 | -2.02500000 |
| H | -0.64107047 | -2.39250758 | -2.02500000 |
| H | -2.39250758 | -0.64107047 | -2.02500000 |
| H | -1.75143711 | 1.75143711  | -2.02500000 |
| H | 0.64107047  | 2.39250758  | -2.02500000 |
| H | 2.39250758  | 0.64107047  | -2.02500000 |
| C | 0.98556144  | -0.98556144 | 2.02500000  |
| C | 1.34630197  | 0.36074053  | 2.02500000  |
| C | 0.36074053  | 1.34630197  | 2.02500000  |
| C | -0.98556144 | 0.98556144  | 2.02500000  |
| C | -1.34630197 | -0.36074053 | 2.02500000  |
| C | -0.36074053 | -1.34630197 | 2.02500000  |
| H | 1.75143711  | -1.75143711 | 2.02500000  |
| H | 2.39250758  | 0.64107047  | 2.02500000  |
| H | 0.64107047  | 2.39250758  | 2.02500000  |
| H | -1.75143711 | 1.75143711  | 2.02500000  |
| H | -2.39250758 | -0.64107047 | 2.02500000  |
| H | -0.64107047 | -2.39250758 | 2.02500000  |

27

M05-2X/6-31+G(d) Benzene...toluene

|   |             |            |             |
|---|-------------|------------|-------------|
| C | 1.99830194  | 1.39680916 | 0.00711381  |
| C | 1.31942083  | 1.56999548 | -1.19701495 |
| C | 1.30803578  | 1.53737669 | 1.20901851  |
| C | -0.74264454 | 2.02005165 | 0.00259398  |
| C | -0.04998621 | 1.84782672 | 1.20362774  |
| C | -0.03863120 | 1.88035936 | -1.19606094 |
| H | 1.82697348  | 1.40985302 | 2.15151503  |
| H | 1.84726958  | 1.46800279 | -2.13767040 |
| C | -2.22053565 | 2.32308166 | -0.00029184 |
| H | -2.50874272 | 2.88361325 | 0.89040859  |
| H | -2.80479608 | 1.39893570 | -0.01558503 |
| H | -2.50037408 | 2.90758990 | -0.87815521 |

|   |             |             |             |
|---|-------------|-------------|-------------|
| H | -0.58031597 | 1.95932386  | 2.14340845  |
| H | -0.56005943 | 2.01736002  | -2.13744925 |
| H | 3.05507877  | 1.15932682  | 0.00889518  |
| C | 1.19271153  | -2.44230816 | -0.00213543 |
| C | 0.50760630  | -2.30282355 | 1.20361255  |
| C | -0.85698141 | -2.01901561 | 1.20100310  |
| C | -1.53646388 | -1.87469230 | -0.00735434 |
| C | -0.85135864 | -2.01417691 | -1.21310232 |
| C | 0.51322906  | -2.29798485 | -1.21049287 |
| H | 2.25297992  | -2.66282354 | -0.00010792 |
| H | 1.03555608  | -2.41496104 | 2.14249189  |
| H | -1.38930001 | -1.91063773 | 2.13785492  |
| H | -2.59673226 | -1.65417692 | -0.00938185 |
| H | -1.37930842 | -1.90203942 | -2.15198166 |
| H | 1.04554767  | -2.40636273 | -2.14734470 |

25

M05-2X/6-31+G(d) Benzene...phenol

|   |             |             |             |
|---|-------------|-------------|-------------|
| C | -0.75082593 | -1.97830694 | 0.00211294  |
| C | -0.07496521 | -1.83581517 | 1.21300112  |
| C | -0.07112111 | -1.83447740 | -1.20587506 |
| C | 1.97806025  | -1.40191339 | 0.00479676  |
| C | 1.29244022  | -1.54646834 | -1.19776101 |
| C | 1.28494658  | -1.54857389 | 1.20701157  |
| H | -0.60192575 | -1.94638940 | -2.14581347 |
| H | 1.81560087  | -1.43576180 | -2.13977687 |
| H | 1.80729635  | -1.43844830 | 2.14956067  |
| H | -0.62753971 | -1.95273041 | 2.13626604  |
| O | -2.08679922 | -2.26050340 | 0.06081505  |
| H | -2.44612490 | -2.33620604 | -0.83147169 |
| H | 3.03702321  | -1.17824021 | 0.00715424  |
| C | -1.55992017 | 1.83684381  | 0.00336936  |
| C | -0.87915232 | 1.98037276  | 1.21109777  |
| C | 0.48455011  | 2.26841309  | 1.21243895  |
| C | 1.16748469  | 2.41292448  | 0.00605172  |
| C | 0.48671684  | 2.26939553  | -1.20167669 |
| C | -0.87698559 | 1.98135520  | -1.20301787 |
| H | -2.61950071 | 1.61303990  | 0.00232728  |
| H | -1.40978436 | 1.86808913  | 2.14844629  |
| H | 1.01349861  | 2.37993338  | 2.15082955  |
| H | 2.22706523  | 2.63672839  | 0.00709380  |
| H | 1.01734888  | 2.38167916  | -2.13902521 |
| H | -1.40593409 | 1.86983492  | -2.14140847 |

28

## M05-2X/6-31+G(d) Benzene...anisole

|   |             |             |             |
|---|-------------|-------------|-------------|
| C | -0.05556317 | -1.86154030 | -0.25239338 |
| C | 0.33528705  | -1.66202812 | 1.07184166  |
| C | 0.79072406  | -1.47762295 | -1.29806258 |
| C | 2.42235376  | -0.69297672 | 0.30449447  |
| C | 2.01892671  | -0.89835902 | -1.01760166 |
| C | 1.57627967  | -1.07695751 | 1.33686808  |
| H | -0.30259440 | -1.95097073 | 1.89514028  |
| H | 1.87399383  | -0.92472030 | 2.36727869  |
| H | 2.66688279  | -0.60461363 | -1.83442973 |
| H | 0.46013800  | -1.64510699 | -2.31508497 |
| O | -1.24016538 | -2.42150876 | -0.62610690 |
| C | -2.12958190 | -2.82589624 | 0.39922891  |
| H | -2.43350843 | -1.97346764 | 1.01201121  |
| H | -1.67459725 | -3.59220230 | 1.03189944  |
| H | -2.99806807 | -3.23927669 | -0.10606516 |
| H | 3.38151702  | -0.24062926 | 0.52124524  |
| C | -1.73068714 | 1.71539130  | -0.29738154 |
| C | -1.33629739 | 1.91653066  | 1.02422848  |
| C | -0.10091972 | 2.49912372  | 1.30186256  |
| C | 0.74006821  | 2.88057741  | 0.25788664  |
| C | 0.34567846  | 2.67943804  | -1.06372337 |
| C | -0.88969921 | 2.09684499  | -1.34135746 |
| H | -2.69056087 | 1.26272343  | -0.51309991 |
| H | -1.98973499 | 1.62014569  | 1.83538534  |
| H | 0.20551641  | 2.65540661  | 2.32873780  |
| H | 1.69994194  | 3.33324527  | 0.47360502  |
| H | 0.99911606  | 2.97582302  | -1.87488024 |
| H | -1.19613534 | 1.94056209  | -2.36823270 |

24

## M05-2X/6-31+G(d) Benzene...fluorobenzene

|   |             |             |             |
|---|-------------|-------------|-------------|
| C | 0.70908851  | 2.00325917  | 0.00000000  |
| C | 0.06314069  | 1.86063520  | 1.21658000  |
| C | 0.06314069  | 1.86063520  | -1.21658000 |
| C | -1.97938639 | 1.40964937  | 0.00000000  |
| C | -1.29733710 | 1.56024447  | -1.20644900 |
| C | -1.29733710 | 1.56024447  | 1.20644900  |
| F | 2.03096993  | 2.29512791  | 0.00000000  |
| H | 0.61967023  | 1.98351579  | 2.13600000  |
| H | 0.61967023  | 1.98351579  | -2.13600000 |
| H | -1.82391309 | 1.44397756  | -2.14537100 |
| H | -1.82391309 | 1.44397756  | 2.14537100  |
| H | -3.03611913 | 1.17632492  | 0.00000000  |
| C | 1.58953425  | -1.84747914 | 0.00000000  |

|   |             |             |             |
|---|-------------|-------------|-------------|
| C | 0.90902926  | -1.99773326 | 1.20705841  |
| C | -0.45198071 | -2.29824150 | 1.20705841  |
| C | -1.13248570 | -2.44849562 | 0.00000000  |
| C | -0.45198071 | -2.29824150 | -1.20705841 |
| C | 0.90902926  | -1.99773326 | -1.20705841 |
| H | 2.64702278  | -1.61398782 | 0.00000000  |
| H | 1.43777353  | -1.88098760 | 2.14492842  |
| H | -0.98072498 | -2.41498716 | 2.14492842  |
| H | -2.18997423 | -2.68198694 | 0.00000000  |
| H | -0.98072498 | -2.41498716 | -2.14492842 |
| H | 1.43777353  | -1.88098760 | -2.14492842 |

24

## M05-2X/AVDZ' Benzene...bromobenzene

|    |             |             |             |
|----|-------------|-------------|-------------|
| C  | -0.64483890 | 1.26226883  | 0.00000000  |
| C  | -1.12739999 | 0.78862699  | 1.21544700  |
| C  | -1.12739999 | 0.78862699  | -1.21544700 |
| C  | -2.62055986 | -0.67693458 | 0.00000000  |
| C  | -2.12219950 | -0.18778549 | -1.20607500 |
| C  | -2.12219950 | -0.18778549 | 1.20607500  |
| Br | 0.71477591  | 2.59675367  | 0.00000000  |
| H  | -3.39694307 | -1.43896778 | 0.00000000  |
| H  | -0.73125666 | 1.17744834  | 2.14993300  |
| H  | -0.73125666 | 1.17744834  | -2.14993300 |
| H  | -2.50730948 | -0.56577742 | -2.15106200 |
| H  | -2.50730948 | -0.56577742 | 2.15106200  |
| C  | 2.02910185  | -1.43779210 | 0.00000000  |
| C  | 1.53174741  | -1.92595386 | -1.20705841 |
| C  | 0.53703854  | -2.90227738 | -1.20705841 |
| C  | 0.03968410  | -3.39043913 | 0.00000000  |
| C  | 0.53703854  | -2.90227738 | 1.20705841  |
| C  | 1.53174741  | -1.92595386 | 1.20705841  |
| H  | 2.80197879  | -0.67920036 | 0.00000000  |
| H  | 1.91818588  | -1.54665799 | -2.14492842 |
| H  | 0.15060007  | -3.28157324 | -2.14492842 |
| H  | -0.73319284 | -4.14903087 | 0.00000000  |
| H  | 0.15060007  | -3.28157324 | 2.14492842  |
| H  | 1.91818588  | -1.54665799 | 2.14492842  |

24

## M05-2X/6-31+G(d) Benzene...chlorobenzene

|   |             |            |             |
|---|-------------|------------|-------------|
| C | 0.03361976  | 1.85584782 | 0.00000000  |
| C | -0.57243936 | 1.54677455 | 1.21281600  |
| C | -0.57243936 | 1.54677455 | -1.21281600 |
| C | -2.43587344 | 0.59647505 | 0.00000000  |

|    |             |             |             |   |             |             |             |
|----|-------------|-------------|-------------|---|-------------|-------------|-------------|
| C  | -1.81322856 | 0.91400660  | -1.20516800 | H | -2.79474646 | -1.01033938 | 0.00000000  |
| C  | -1.81322856 | 0.91400660  | 1.20516800  | H | -1.69041254 | -1.57071358 | -2.14492842 |
| C1 | 1.58712692  | 2.64809321  | 0.00000000  | H | 0.51825529  | -2.69146199 | -2.14492842 |
| H  | -3.40034019 | 0.10462387  | 0.00000000  |   |             |             |             |
| H  | -0.07859025 | 1.79862384  | 2.14214300  |   |             |             |             |
| H  | -0.07859025 | 1.79862384  | -2.14214300 |   |             |             |             |
| H  | -2.29118053 | 0.67026441  | -2.14585700 |   |             |             |             |
| H  | -2.29118053 | 0.67026441  | 2.14585700  |   |             |             |             |
| C  | 1.81784913  | -1.61210840 | 0.00000000  |   |             |             |             |
| C  | 1.19702291  | -1.92871249 | -1.20705841 |   |             |             |             |
| C  | -0.04462952 | -2.56192066 | -1.20705841 |   |             |             |             |
| C  | -0.66545574 | -2.87852474 | 0.00000000  |   |             |             |             |
| C  | -0.04462952 | -2.56192066 | 1.20705841  |   |             |             |             |
| C  | 1.19702291  | -1.92871249 | 1.20705841  |   |             |             |             |
| H  | 2.78259828  | -1.12011320 | 0.00000000  |   |             |             |             |
| H  | 1.67939749  | -1.68271489 | -2.14492842 |   |             |             |             |
| H  | -0.52700409 | -2.80791826 | -2.14492842 |   |             |             |             |
| H  | -1.63020489 | -3.37051994 | 0.00000000  |   |             |             |             |
| H  | -0.52700409 | -2.80791826 | 2.14492842  |   |             |             |             |
| H  | 1.67939749  | -1.68271489 | 2.14492842  |   |             |             |             |

25

M05-2X/6-31+G(d) Benzene...cyanobenzene

|   |             |             |             |
|---|-------------|-------------|-------------|
| C | 2.39460020  | 0.67372350  | 0.00000000  |
| C | 1.77567472  | 0.98778601  | 1.20898600  |
| C | 1.77567472  | 0.98778601  | -1.20898600 |
| C | -0.08143169 | 1.93014095  | 0.00000000  |
| C | 0.53596888  | 1.61685223  | -1.21523800 |
| C | 0.53596888  | 1.61685223  | 1.21523800  |
| C | -1.36537242 | 2.58165337  | 0.00000000  |
| N | -2.39641699 | 3.10483822  | 0.00000000  |
| H | 2.25810021  | 0.74298795  | 2.14648100  |
| H | 2.25810021  | 0.74298795  | -2.14648100 |
| H | 0.04365020  | 1.86667041  | -2.14582200 |
| H | 0.04365020  | 1.86667041  | 2.14582200  |
| H | 3.36022077  | 0.18373687  | 0.00000000  |
| C | 0.65684914  | -2.76178892 | 0.00000000  |
| C | 0.03538525  | -2.44643835 | 1.20705841  |
| C | -1.20754251 | -1.81573722 | 1.20705841  |
| C | -1.82900639 | -1.50038665 | 0.00000000  |
| C | -1.20754251 | -1.81573722 | -1.20705841 |
| C | 0.03538525  | -2.44643835 | -1.20705841 |
| H | 1.62258920  | -3.25183619 | 0.00000000  |
| H | 0.51825529  | -2.69146199 | 2.14492842  |
| H | -1.69041254 | -1.57071358 | 2.14492842  |

**Maleic anhydride + Benzene**

12

Benzene M05-2X/6-31+G(d) Optimized Geometry

|   |             |             |            |
|---|-------------|-------------|------------|
| C | 0.98557655  | 0.98557655  | 0.00000000 |
| C | -0.36074606 | 1.34632261  | 0.00000000 |
| C | -1.34632261 | 0.36074606  | 0.00000000 |
| C | -0.98557655 | -0.98557655 | 0.00000000 |
| C | 0.36074606  | -1.34632261 | 0.00000000 |
| C | 1.34632261  | -0.36074606 | 0.00000000 |
| H | 1.75158165  | 1.75158165  | 0.00000000 |
| H | -0.64112338 | 2.39270503  | 0.00000000 |
| H | -2.39270503 | 0.64112338  | 0.00000000 |
| H | -1.75158165 | -1.75158165 | 0.00000000 |
| H | 0.64112338  | -2.39270503 | 0.00000000 |
| H | 2.39270503  | -0.64112338 | 0.00000000 |

9

maleic anhydride M05-2X/6-31+G(d) Optimized Geometry

|   |             |            |             |
|---|-------------|------------|-------------|
| C | -0.66511601 | 0.00000000 | -1.25825562 |
| C | 0.66511601  | 0.00000000 | -1.25825562 |
| C | -1.12517222 | 0.00000000 | 0.16203770  |
| H | -1.36057753 | 0.00000000 | -2.08319562 |
| H | 1.36057753  | 0.00000000 | -2.08319562 |
| O | 0.00000000  | 0.00000000 | 0.96858195  |
| O | -2.23387747 | 0.00000000 | 0.59829001  |
| C | 1.12517222  | 0.00000000 | 0.16203770  |
| O | 2.23387747  | 0.00000000 | 0.59829001  |

21

Cycloadduct M05-2X/6-31+G(d) Optimized Geometry

|   |             |             |             |
|---|-------------|-------------|-------------|
| C | -0.57263822 | 2.36825874  | -0.66659440 |
| H | -1.00457834 | 3.14618097  | 1.28271350  |
| H | -1.00457834 | 3.14618097  | -1.28271350 |
| C | -0.57263822 | 2.36825874  | 0.66659440  |
| C | 1.43881194  | 0.93169278  | -0.66684070 |
| H | 2.31138609  | 0.75796117  | -1.28286490 |
| C | 0.06726925  | 1.13743393  | -1.28365590 |
| H | 2.31138609  | 0.75796117  | 1.28286490  |
| C | -0.80726593 | -0.05959287 | 0.76421420  |
| C | -0.80726593 | -0.05959287 | -0.76421420 |
| C | 1.43881194  | 0.93169278  | 0.66684070  |
| C | 0.06726925  | 1.13743393  | 1.28365590  |
| C | -0.18825407 | -1.39015367 | 1.13979080  |
| H | 0.08403621  | 1.14722267  | 2.37049640  |

|   |             |             |             |
|---|-------------|-------------|-------------|
| H | 0.08403621  | 1.14722267  | -2.37049640 |
| H | -1.80492398 | -0.00184462 | -1.19906680 |
| C | -0.18825407 | -1.39015367 | -1.13979080 |
| H | -1.80492398 | -0.00184462 | 1.19906680  |
| O | 0.03429023  | -1.82017388 | 2.23041260  |
| O | 0.12805509  | -2.10349065 | 0.00000000  |
| O | 0.03429023  | -1.82017388 | -2.23041260 |

16

transition state M05-2X/6-31+G(d) Optimized Geometry

|   |             |             |             |
|---|-------------|-------------|-------------|
| H | 2.24197736  | 0.51791155  | 1.26368833  |
| C | 0.16151958  | 1.27181044  | 1.31236383  |
| H | 2.24197736  | 0.51791155  | -1.26368833 |
| C | -0.97827993 | -0.19622085 | -0.72212747 |
| C | -0.97827993 | -0.19622085 | 0.72212747  |
| C | 1.42233849  | 0.90987775  | -0.67407207 |
| C | 0.16151958  | 1.27181044  | -1.31236383 |
| C | -0.19310925 | -1.39558777 | -1.13399284 |
| H | 0.12648862  | 1.21086734  | -2.39458300 |
| H | 0.12648862  | 1.21086734  | 2.39458300  |
| H | -1.86801850 | 0.01358290  | 1.30546519  |
| C | -0.19310925 | -1.39558777 | 1.13399284  |
| H | -1.86801850 | 0.01358290  | -1.30546519 |
| O | 0.02799174  | -1.82121699 | -2.22922430 |
| O | 0.35180128  | -1.97959278 | 0.00000000  |
| O | 0.02799174  | -1.82121699 | 2.22922430  |

Reactions in Scheme 1: Anthracene + Substrates 1a-1e

55

2a M05-2X/6-31+G(d) Optimized Geometry

|   |             |             |             |
|---|-------------|-------------|-------------|
| C | -1.98497582 | 0.69604288  | 3.82416700  |
| C | -1.98497582 | -0.69604288 | 3.82416700  |
| C | -4.26445542 | -0.69607388 | -2.32798594 |
| C | -4.26445542 | 0.69607388  | -2.32798594 |
| C | -1.75182380 | -1.40074078 | 2.64100112  |
| C | -1.75182380 | 1.40074078  | 2.64100112  |
| C | -3.33985211 | -1.40333015 | -1.55508832 |
| C | -3.33985211 | 1.40333015  | -1.55508832 |
| C | -2.43315624 | -0.70114334 | -0.77509375 |
| C | -2.43315624 | 0.70114334  | -0.77509375 |
| C | -1.52251784 | -0.69995661 | 1.46702926  |
| C | -1.52251784 | 0.69995661  | 1.46702926  |
| H | -2.16764977 | 1.23620910  | 4.74509714  |
| H | -2.16764977 | -1.23620910 | 4.74509714  |
| H | -4.97771873 | -1.23581473 | -2.93848847 |
| H | -4.97771873 | 1.23581473  | -2.93848847 |
| H | -1.75182765 | -2.48529761 | 2.63829186  |
| H | -1.75182765 | 2.48529761  | 2.63829186  |
| H | -3.32080895 | -2.48696890 | -1.57202374 |
| H | -3.32080895 | 2.48696890  | -1.57202374 |
| C | -1.33490721 | -1.30000111 | 0.09042325  |
| C | -1.33490721 | 1.30000111  | 0.09042325  |
| C | 0.00000000  | -0.77177965 | -0.53060207 |
| C | 0.00000000  | 0.77177965  | -0.53060207 |
| C | 0.00000000  | -1.13535965 | -2.00933402 |
| C | 0.00000000  | 1.13535965  | -2.00933402 |
| O | 0.00000000  | 0.00000000  | -2.78987001 |
| O | 0.00000000  | -2.23100679 | -2.48499558 |
| O | 0.00000000  | 2.23100679  | -2.48499558 |
| H | -1.34932463 | -2.39041175 | 0.08790304  |
| H | -1.34932463 | 2.39041175  | 0.08790304  |
| C | 1.98497582  | 0.69604288  | 3.82416700  |
| C | 1.98497582  | -0.69604288 | 3.82416700  |
| C | 1.52251784  | -0.69995661 | 1.46702926  |
| C | 1.52251784  | 0.69995661  | 1.46702926  |
| C | 1.75182380  | -1.40074078 | 2.64100112  |
| C | 1.75182380  | 1.40074078  | 2.64100112  |
| C | 1.33490721  | -1.30000111 | 0.09042325  |
| C | 1.33490721  | 1.30000111  | 0.09042325  |
| C | 2.43315624  | -0.70114334 | -0.77509375 |
| C | 2.43315624  | 0.70114334  | -0.77509375 |

|   |            |             |             |
|---|------------|-------------|-------------|
| C | 4.26445542 | -0.69607388 | -2.32798594 |
| C | 4.26445542 | 0.69607388  | -2.32798594 |
| C | 3.33985211 | -1.40333015 | -1.55508832 |
| C | 3.33985211 | 1.40333015  | -1.55508832 |
| H | 2.16764977 | 1.23620910  | 4.74509714  |
| H | 2.16764977 | -1.23620910 | 4.74509714  |
| H | 1.75182765 | -2.48529761 | 2.63829186  |
| H | 1.75182765 | 2.48529761  | 2.63829186  |
| H | 1.34932463 | -2.39041175 | 0.08790304  |
| H | 1.34932463 | 2.39041175  | 0.08790304  |
| H | 4.97771873 | -1.23581473 | -2.93848847 |
| H | 4.97771873 | 1.23581473  | -2.93848847 |
| H | 3.32080895 | 2.48696890  | -1.57202374 |
| H | 3.32080895 | -2.48696890 | -1.57202374 |

31

1a M05-2X/6-31+G(d) Optimized Geometry

|   |             |             |             |
|---|-------------|-------------|-------------|
| C | 0.69494540  | -3.26431296 | 2.08667477  |
| C | -0.69494540 | -3.26431296 | 2.08667477  |
| C | -0.69494540 | 3.26431296  | 2.08667477  |
| C | 0.69494540  | 3.26431296  | 2.08667477  |
| C | -1.40353497 | -2.23170533 | 1.46086133  |
| C | 1.40353497  | -2.23170533 | 1.46086133  |
| C | -1.40353497 | 2.23170533  | 1.46086133  |
| C | 1.40353497  | 2.23170533  | 1.46086133  |
| C | -0.70084825 | 1.21347118  | 0.84062066  |
| C | 0.70084825  | 1.21347118  | 0.84062066  |
| C | -0.70084825 | -1.21347118 | 0.84062066  |
| C | 0.70084825  | -1.21347118 | 0.84062066  |
| H | 1.23555675  | -4.06752466 | 2.57165248  |
| H | -1.23555675 | -4.06752466 | 2.57165248  |
| H | -1.23555675 | 4.06752466  | 2.57165248  |
| H | 1.23555675  | 4.06752466  | 2.57165248  |
| H | -2.48743864 | -2.23057028 | 1.46021071  |
| H | 2.48743864  | -2.23057028 | 1.46021071  |
| H | -2.48743864 | 2.23057028  | 1.46021071  |
| H | 2.48743864  | 2.23057028  | 1.46021071  |
| C | -1.31251734 | 0.00000000  | 0.12840773  |
| C | 1.31251734  | 0.00000000  | 0.12840773  |
| C | -0.66636294 | 0.00000000  | -1.23009099 |
| C | 0.66636294  | 0.00000000  | -1.23009099 |
| C | -1.13743300 | 0.00000000  | -2.63355884 |
| C | 1.13743300  | 0.00000000  | -2.63355884 |
| O | 0.00000000  | 0.00000000  | -3.43782553 |
| O | -2.24158048 | 0.00000000  | -3.08386513 |

|   |             |            |             |
|---|-------------|------------|-------------|
| O | 2.24158048  | 0.00000000 | -3.08386513 |
| H | -2.39988772 | 0.00000000 | 0.11558118  |
| H | 2.39988772  | 0.00000000 | 0.11558118  |

55

TS2a M05-2X/6-31+G(d) Optimized Geometry

|   |            |            |            |
|---|------------|------------|------------|
| C | -3.4449160 | 2.5136380  | -0.9544600 |
| C | -3.4447850 | 2.6174770  | 0.4334850  |
| C | -3.2730800 | -3.7203010 | 0.8306760  |
| C | -3.2449250 | -3.8058210 | -0.5551420 |
| C | -2.7032530 | 1.7227590  | 1.2093100  |
| C | -2.6938750 | 1.5190690  | -1.5839390 |
| C | -2.6543890 | -2.6480310 | 1.4884840  |
| C | -2.5977170 | -2.8205230 | -1.3138490 |
| C | -2.0173530 | -1.6764010 | 0.7387480  |
| C | -1.9882530 | -1.7633330 | -0.6637600 |
| C | -1.9649740 | 0.7273870  | 0.5866500  |
| C | -1.9566300 | 0.6336950  | -0.8119290 |
| H | -4.0328930 | 3.2025810  | -1.5486190 |
| H | -4.0310160 | 3.3888220  | 0.9180340  |
| H | -3.7677520 | -4.4899800 | 1.4099100  |
| H | -3.7174290 | -4.6422020 | -1.0549850 |
| H | -2.7168790 | 1.7946550  | 2.2911360  |
| H | -2.6989000 | 1.4254310  | -2.6643530 |
| H | -2.6662010 | -2.5855090 | 2.5704470  |
| H | -2.5657920 | -2.8908500 | -2.3949570 |
| C | -1.2776320 | -0.4401950 | 1.2828100  |
| C | -1.2349770 | -0.5961060 | -1.3265710 |
| C | 0.1171580  | -0.6307860 | 0.7058240  |
| C | 0.1413840  | -0.6753670 | -0.6798930 |
| C | 1.0345060  | -1.6810920 | 1.1961290  |
| C | 1.0830190  | -1.7519160 | -1.0656250 |
| O | 1.6700240  | -2.2424350 | 0.0918480  |
| O | 1.2468640  | -2.0685880 | 2.3092670  |
| O | 1.3263210  | -2.2077230 | -2.1456150 |
| H | -1.3016320 | -0.3770780 | 2.3694530  |
| H | -1.2099880 | -0.6708170 | -2.4124590 |
| C | -0.3908710 | 4.1512430  | -0.4978870 |
| C | -0.2910090 | 4.1317270  | 0.9123230  |
| C | 0.9198010  | 2.1243970  | -0.6264530 |
| C | 1.0012780  | 2.0969790  | 0.7878870  |
| C | 0.3669930  | 3.1073620  | 1.5475650  |
| C | 0.1814310  | 3.1551920  | -1.2520940 |
| C | 1.7240780  | 1.0265360  | 1.3807170  |
| C | 1.5806370  | 1.0867810  | -1.3454230 |

|   |            |            |            |
|---|------------|------------|------------|
| C | 4.8317390  | -0.8590820 | 0.5250220  |
| C | 4.7641920  | -0.8207140 | -0.8869440 |
| C | 2.7956610  | 0.4337260  | 0.6558090  |
| C | 2.7267440  | 0.4717250  | -0.7603940 |
| C | 3.8563380  | -0.2612320 | 1.2855730  |
| C | 3.7235410  | -0.1850800 | -1.5207860 |
| H | -0.9332520 | 4.9526640  | -0.9837120 |
| H | -0.7520720 | 4.9225870  | 1.4910830  |
| H | 0.4339440  | 3.0753060  | 2.6292180  |
| H | 0.0941060  | 3.1614160  | -2.3326260 |
| H | 1.7128080  | 0.9195750  | 2.4614820  |
| H | 1.4712250  | 1.0467110  | -2.4252700 |
| H | 5.6501590  | -1.3787360 | 1.0068440  |
| H | 5.5317570  | -1.3117580 | -1.4715910 |
| H | 3.6507040  | -0.1825220 | -2.6016530 |
| H | 3.8842790  | -0.3126160 | 2.3674240  |

61

2b M05-2X/6-31+G(d) Optimized Geometry

|   |             |             |             |
|---|-------------|-------------|-------------|
| C | 2.36201206  | -3.32137119 | 0.69587319  |
| C | 2.36201206  | -3.32137119 | -0.69587319 |
| C | -4.15580479 | -2.51727872 | -0.69607799 |
| C | -4.15580479 | -2.51727872 | 0.69607799  |
| C | 1.42455523  | -2.58574415 | -1.42426235 |
| C | 1.42455523  | -2.58574415 | 1.42426235  |
| C | -3.04214068 | -2.05625706 | -1.40333450 |
| C | -3.04214068 | -2.05625706 | 1.40333450  |
| C | -1.93013518 | -1.61635399 | -0.70072552 |
| C | -1.93013518 | -1.61635399 | 0.70072552  |
| C | 0.48348086  | -1.85661223 | -0.69910293 |
| C | 0.48348086  | -1.85661223 | 0.69910293  |
| H | 3.10807443  | -3.90116090 | 1.22853511  |
| H | 3.10807443  | -3.90116090 | -1.22853511 |
| H | -5.02778253 | -2.86546174 | -1.23579765 |
| H | -5.02778253 | -2.86546174 | 1.23579765  |
| C | 1.44334432  | -2.57787649 | -2.93147926 |
| H | 0.51756522  | -2.98371653 | -3.34770461 |
| H | 1.56431860  | -1.56281738 | -3.32092180 |
| H | 2.27160255  | -3.18020681 | -3.30634374 |
| C | 1.44334432  | -2.57787649 | 2.93147926  |
| H | 0.51756522  | -2.98371653 | 3.34770461  |
| H | 1.56431860  | -1.56281738 | 3.32092180  |
| H | 2.27160255  | -3.18020681 | 3.30634374  |
| H | -3.04896396 | -2.02991017 | -2.48706388 |

|                     |                    |             |             |   |             |             |             |
|---------------------|--------------------|-------------|-------------|---|-------------|-------------|-------------|
| H                   | -3.04896396        | -2.02991017 | 2.48706388  | C | 0.66837265  | 3.38143901  | -1.42860001 |
| C                   | -0.65240303        | -1.04868389 | -1.29680423 | C | 0.66837265  | 3.38143901  | 1.42860001  |
| C                   | -0.65240303        | -1.04868389 | 1.29680423  | C | 0.13320673  | 2.31878629  | -0.70091416 |
| C                   | -0.57406615        | 0.42173990  | -0.77078490 | C | 0.13320673  | 2.31878629  | 0.70091416  |
| C                   | -0.57406615        | 0.42173990  | 0.77078490  | C | -1.83604924 | 0.90276700  | -0.69957894 |
| C                   | -1.87817275        | 1.11740570  | -1.13539203 | C | -1.83604924 | 0.90276700  | 0.69957894  |
| C                   | -1.87817275        | 1.11740570  | 1.13539203  | H | -5.17421068 | 0.76243878  | 1.23615611  |
| O                   | -2.56845127        | 1.48282660  | 0.00000000  | H | -5.17421068 | 0.76243878  | -1.23615611 |
| O                   | -2.29736648        | 1.34215596  | -2.23109310 | H | 1.61226054  | 5.29726411  | -1.22741990 |
| O                   | -2.29736648        | 1.34215596  | 2.23109310  | H | 1.61226054  | 5.29726411  | 1.22741990  |
| H                   | -0.67022573        | -1.05252562 | -2.38587067 | C | 0.69584814  | 3.38097177  | -2.93589953 |
| H                   | -0.67022573        | -1.05252562 | 2.38587067  | H | -0.31241397 | 3.30624225  | -3.35211636 |
| C                   | 4.20200977         | 0.11240908  | 0.69576273  | H | 1.14368476  | 4.30321624  | -3.30729995 |
| C                   | 4.20200977         | 0.11240908  | -0.69576273 | H | 1.28293481  | 2.54149879  | -3.31619904 |
| C                   | 1.90559289         | 0.81900137  | -0.70030637 | C | 0.69584814  | 3.38097177  | 2.93589953  |
| C                   | 1.90559289         | 0.81900137  | 0.70030637  | H | -0.31241397 | 3.30624225  | 3.35211636  |
| C                   | 3.04975186         | 0.46972676  | -1.40056076 | H | 1.14368476  | 4.30321624  | 3.30729995  |
| C                   | 3.04975186         | 0.46972676  | 1.40056076  | H | 1.28293481  | 2.54149879  | 3.31619904  |
| C                   | 0.60357861         | 1.30460334  | -1.30011549 | H | -3.02809464 | 0.84872576  | -2.48548639 |
| C                   | 0.60357861         | 1.30460334  | 1.30011549  | H | -3.02809464 | 0.84872576  | 2.48548639  |
| C                   | 0.36029709         | 2.68155290  | -0.70117779 | C | -0.45369062 | 1.04349363  | -1.29691176 |
| C                   | 0.36029709         | 2.68155290  | 0.70117779  | C | -0.45369062 | 1.04349363  | 1.29691176  |
| C                   | -0.14180927        | 5.02959500  | -0.69605156 | C | 0.46641017  | -0.10523309 | -0.77111937 |
| C                   | -0.14180927        | 5.02959500  | 0.69605156  | C | 0.46641017  | -0.10523309 | 0.77111937  |
| C                   | 0.10177100         | 3.84934403  | -1.40327624 | C | 1.90132855  | 0.25173002  | -1.13417007 |
| C                   | 0.10177100         | 3.84934403  | 1.40327624  | C | 1.90132855  | 0.25173002  | 1.13417007  |
| H                   | 5.10007628         | -0.16113724 | 1.23616815  | O | 2.66186064  | 0.43079650  | 0.00000000  |
| H                   | 5.10007628         | -0.16113724 | -1.23616815 | O | 2.36284516  | 0.37071770  | -2.23029253 |
| H                   | 3.05171309         | 0.48080669  | -2.48513883 | O | 2.36284516  | 0.37071770  | 2.23029253  |
| H                   | 3.05171309         | 0.48080669  | 2.48513883  | H | -0.45986926 | 1.04882893  | -2.38630789 |
| H                   | 0.60770188         | 1.31842129  | -2.39079024 | H | -0.45986926 | 1.04882893  | 2.38630789  |
| H                   | 0.60770188         | 1.31842129  | 2.39079024  | C | -3.29195343 | -3.06202099 | 0.69604312  |
| H                   | -0.34250768        | 5.94671348  | -1.23586829 | C | -3.29195343 | -3.06202099 | -0.69604312 |
| H                   | -0.34250768        | 5.94671348  | 1.23586829  | C | -1.10958577 | -2.05829878 | -0.69995380 |
| H                   | 0.07763705         | 3.84060101  | 2.48693285  | C | -1.10958577 | -2.05829878 | 0.69995380  |
| H                   | 0.07763705         | 3.84060101  | -2.48693285 | C | -2.19665490 | -2.55744834 | -1.40068289 |
|                     |                    |             |             | C | -2.19665490 | -2.55744834 | 1.40068289  |
| 61                  |                    |             |             | C | 0.18321664  | -1.54949608 | -1.30002183 |
| 3b M05-2X/6-31+G(d) | Optimized Geometry |             |             | C | 0.18321664  | -1.54949608 | 1.30002183  |
| C                   | -4.23596947        | 0.80035743  | 0.69606985  | C | 1.28562765  | -2.40944795 | -0.70117265 |
| C                   | -4.23596947        | 0.80035743  | -0.69606985 | C | 1.28562765  | -2.40944795 | 0.70117265  |
| C                   | 1.19105436         | 4.45128678  | -0.69562763 | C | 3.23151689  | -3.81641491 | -0.69604313 |
| C                   | 1.19105436         | 4.45128678  | 0.69562763  | C | 3.23151689  | -3.81641491 | 0.69604313  |
| C                   | -3.03084524        | 0.84991663  | -1.40076919 | C | 2.25980653  | -3.10341905 | -1.40322227 |
| C                   | -3.03084524        | 0.84991663  | 1.40076919  | C | 2.25980653  | -3.10341905 | 1.40322227  |

|   |             |             |             |
|---|-------------|-------------|-------------|
| H | -4.14425122 | -3.45583188 | 1.23627312  |
| H | -4.14425122 | -3.45583188 | -1.23627312 |
| H | -2.19421325 | -2.55657648 | -2.48525352 |
| H | -2.19421325 | -2.55657648 | 2.48525352  |
| H | 0.18855354  | -1.56282501 | -2.39049943 |
| H | 0.18855354  | -1.56282501 | 2.39049943  |
| H | 3.99491497  | -4.36298930 | -1.23589928 |
| H | 3.99491497  | -4.36298930 | 1.23589928  |
| H | 2.27159816  | -3.08119629 | 2.48690909  |
| H | 2.27159816  | -3.08119629 | -2.48690909 |

37

|    |                                     |             |             |
|----|-------------------------------------|-------------|-------------|
| 1b | M05-2X/6-31+G(d) Optimized Geometry |             |             |
| C  | -1.74074123                         | 3.13220591  | 0.69490745  |
| C  | -1.74074123                         | 3.13220591  | -0.69490745 |
| C  | 3.99303734                          | 0.05835949  | -0.69490620 |
| C  | 3.99303734                          | 0.05835949  | 0.69490620  |
| C  | -1.13708831                         | 2.10328574  | -1.42802546 |
| C  | -1.13708831                         | 2.10328574  | 1.42802546  |
| C  | 2.78718990                          | -0.00864698 | -1.40347302 |
| C  | 2.78718990                          | -0.00864698 | 1.40347302  |
| C  | 1.59695764                          | -0.07569616 | -0.70057415 |
| C  | 1.59695764                          | -0.07569616 | 0.70057415  |
| C  | -0.54193916                         | 1.07785027  | -0.69992755 |
| C  | -0.54193916                         | 1.07785027  | 0.69992755  |
| H  | -2.22013112                         | 3.94603762  | 1.22734122  |
| H  | -2.22013112                         | 3.94603762  | -1.22734122 |
| H  | 4.93006267                          | 0.10751700  | -1.23549436 |
| H  | 4.93006267                          | 0.10751700  | 1.23549436  |
| H  | 2.78596726                          | -0.01072083 | -2.48746942 |
| H  | 2.78596726                          | -0.01072083 | 2.48746942  |
| C  | 0.19096448                          | -0.12945608 | -1.30977140 |
| C  | 0.19096448                          | -0.12945608 | 1.30977140  |
| C  | -0.45451126                         | -1.32470637 | -0.66619287 |
| C  | -0.45451126                         | -1.32470637 | 0.66619287  |
| C  | -1.12869296                         | -2.55486716 | -1.13743898 |
| C  | -1.12869296                         | -2.55486716 | 1.13743898  |
| O  | -1.51392439                         | -3.26158070 | 0.00000000  |
| O  | -1.34820243                         | -2.94867252 | -2.24183165 |
| O  | -1.34820243                         | -2.94867252 | 2.24183165  |
| H  | 0.18985180                          | -0.14911913 | -2.39594987 |
| H  | 0.18985180                          | -0.14911913 | 2.39594987  |
| C  | -1.13617179                         | 2.11665365  | -2.93619609 |
| C  | -1.13617179                         | 2.11665365  | 2.93619609  |
| H  | -1.66452219                         | 2.99437803  | -3.30901553 |

|   |             |            |             |
|---|-------------|------------|-------------|
| H | -1.66452219 | 2.99437803 | 3.30901553  |
| H | -0.11790191 | 2.14659631 | -3.33278668 |
| H | -0.11790191 | 2.14659631 | 3.33278668  |
| H | -1.62811864 | 1.23063395 | -3.34507612 |
| H | -1.62811864 | 1.23063395 | 3.34507612  |

61

|      |                                     |            |            |
|------|-------------------------------------|------------|------------|
| TS2b | M05-2X/6-31+G(d) Optimized Geometry |            |            |
| C    | -3.6547820                          | -1.7551240 | 0.8953910  |
| C    | -3.6726610                          | -1.8427380 | -0.4933330 |
| C    | -2.3289050                          | 4.3352280  | -0.8533220 |
| C    | -2.2962240                          | 4.4082160  | 0.5330780  |
| C    | -2.7857730                          | -1.1067320 | -1.2832150 |
| C    | -2.7423280                          | -0.9328260 | 1.5588190  |
| C    | -1.9120320                          | 3.1702370  | -1.5128430 |
| C    | -1.8465610                          | 3.3174540  | 1.2907620  |
| C    | -1.4723670                          | 2.0944080  | -0.7637720 |
| C    | -1.4392670                          | 2.1682380  | 0.6387470  |
| C    | -1.8771570                          | -0.2778760 | -0.6252840 |
| C    | -1.8567180                          | -0.1968350 | 0.7722770  |
| H    | -4.3638340                          | -2.3352840 | 1.4761250  |
| H    | -4.3960730                          | -2.4898690 | -0.9776250 |
| H    | -2.6684160                          | 5.1855880  | -1.4315230 |
| H    | -2.6099460                          | 5.3154620  | 1.0342720  |
| C    | -2.8386300                          | -1.1876720 | -2.7870890 |
| H    | -3.5545010                          | -1.9469100 | -3.1043490 |
| H    | -3.1444820                          | -0.2343860 | -3.2270020 |
| H    | -1.8630480                          | -1.4472810 | -3.2055750 |
| C    | -2.7366570                          | -0.8316000 | 3.0633250  |
| H    | -3.4561840                          | -1.5277810 | 3.4957680  |
| H    | -3.0029620                          | 0.1748930  | 3.3973260  |
| H    | -1.7515660                          | -1.0648770 | 3.4769660  |
| H    | -1.9237540                          | 3.1164730  | -2.5954290 |
| H    | -1.8074960                          | 3.3772240  | 2.3724140  |
| C    | -0.9722680                          | 0.7443570  | -1.3074210 |
| C    | -0.9194670                          | 0.8788370  | 1.2971100  |
| C    | 0.4293090                           | 0.6629620  | -0.7221250 |
| C    | 0.4527190                           | 0.7059690  | 0.6628700  |
| C    | 1.5332430                           | 1.5177620  | -1.2080940 |
| C    | 1.5751340                           | 1.5897210  | 1.0538740  |
| O    | 2.2541110                           | 1.9550540  | -0.1000640 |
| O    | 1.8238240                           | 1.8524980  | -2.3206870 |
| O    | 1.8910700                           | 1.9977430  | 2.1343730  |
| H    | -0.9898910                          | 0.7005870  | -2.3938120 |
| H    | -0.8812570                          | 0.9506810  | 2.3814740  |



|   |            |            |            |   |            |            |            |
|---|------------|------------|------------|---|------------|------------|------------|
| C | -0.9861670 | -3.9109850 | 0.5665090  | H | -3.9505030 | -2.0088100 | 3.4339560  |
| C | -0.8940200 | -3.9318380 | -0.8440690 | H | -2.2090390 | -1.7101940 | 3.4184420  |
| C | 0.6968040  | -2.1785560 | 0.6579310  | H | -3.3423240 | -0.3537400 | 3.3597790  |
| C | 0.7749080  | -2.1891800 | -0.7569310 | C | -3.1592620 | -1.8014010 | -2.8434210 |
| C | -0.0461090 | -3.0711500 | -1.4972040 | H | -3.9342370 | -2.4959250 | -3.1689560 |
| C | -0.2212530 | -3.0387540 | 1.3030450  | H | -2.1959850 | -2.1795240 | -3.1949310 |
| C | 1.6849970  | -1.2856250 | -1.3694080 | H | -3.3433710 | -0.8411080 | -3.3324980 |
| C | 1.5452560  | -1.2731160 | 1.3573950  | H | -1.7284660 | 2.7593110  | 2.2566850  |
| C | 5.0963170  | -0.0055840 | -0.5491450 | H | -1.8155950 | 2.3663130  | -2.6966250 |
| C | 5.0296380  | -0.0087520 | 0.8632800  | C | -1.1418660 | 0.1583700  | 1.2693470  |
| C | 2.8526140  | -0.8937530 | -0.6560200 | C | -1.1439560 | -0.0245490 | -1.3331790 |
| C | 2.7845320  | -0.8954100 | 0.7606660  | C | 0.1029690  | -0.5074370 | 0.7055630  |
| C | 4.0223520  | -0.4210750 | -1.2984030 | C | 0.1158570  | -0.5713430 | -0.6778790 |
| C | 3.8905730  | -0.4266960 | 1.5088510  | C | 0.5874810  | -1.8082520 | 1.2108430  |
| H | -1.6730780 | -4.5823150 | 1.0664710  | C | 0.6152690  | -1.9151390 | -1.0474390 |
| H | -1.5055180 | -4.6246660 | -1.4090850 | O | 0.9950890  | -2.5672280 | 0.1170320  |
| H | 0.0281250  | -3.0789410 | -2.5787890 | O | 0.6329350  | -2.2382980 | 2.3283540  |
| H | -0.2949960 | -3.0181930 | 2.3845850  | O | 0.6728050  | -2.4433910 | -2.1210330 |
| H | 1.6898710  | -1.1973350 | -2.4519760 | H | -1.1390260 | 0.2418690  | 2.3537540  |
| H | 1.4503130  | -1.1942690 | 2.4366430  | H | -1.1328530 | -0.1052960 | -2.4177290 |
| H | 5.9955250  | 0.3433210  | -1.0407730 | C | 1.2844150  | 4.1310700  | -0.5506650 |
| H | 5.8787610  | 0.3377320  | 1.4386810  | C | 1.3641100  | 4.0956790  | 0.8607280  |
| H | 3.8233390  | -0.3986400 | 2.5897190  | C | 1.8240870  | 1.7767260  | -0.6476690 |
| H | 4.0547210  | -0.3926490 | -2.3809870 | C | 1.8848420  | 1.7403120  | 0.7678200  |

61

TS3b M05-2X/6-31+G(d) Optimized Geometry

|   |            |            |            |   |           |            |            |
|---|------------|------------|------------|---|-----------|------------|------------|
| C | -2.1530070 | 3.6576470  | -0.9983360 | C | 2.0891270 | 0.5669990  | -1.3509320 |
| C | -2.1236270 | 3.7665530  | 0.3889930  | C | 4.4353110 | -2.3778150 | 0.5667680  |
| C | -4.1055910 | -2.2586660 | 0.8288590  | C | 4.3895100 | -2.3371190 | -0.8462330 |
| C | -4.1031940 | -2.3597720 | -0.5561220 | C | 2.9875950 | -0.4464640 | 0.6675800  |
| C | -1.7374460 | 2.6778700  | 1.1753290  | C | 2.9410870 | -0.4051960 | -0.7497170 |
| C | -1.7859240 | 2.4606170  | -1.6165210 | C | 3.7329180 | -1.4631140 | 1.3128350  |
| C | -3.1770510 | -1.4568630 | 1.5081170  | C | 3.6435950 | -1.3824760 | -1.4948710 |
| C | -3.1722650 | -1.6645840 | -1.3413080 | H | 1.0502430 | 5.0635020  | -1.0489000 |
| C | -2.2596220 | -0.7605490 | 0.7303380  | H | 1.1967980 | 5.0031470  | 1.4277480  |
| C | -2.2564940 | -0.8636340 | -0.6694770 | H | 1.6760860 | 2.8764640  | 2.5941190  |
| C | -1.3844020 | 1.4843600  | 0.5634800  | H | 1.4115620 | 3.0127510  | -2.3710890 |
| C | -1.4022130 | 1.3818350  | -0.8336640 | H | 2.1419220 | 0.4131420  | 2.4600560  |
| H | -2.4654130 | 4.5020150  | -1.6007390 | H | 1.9769660 | 0.5545380  | -2.4311840 |
| H | -2.4109510 | 4.6965550  | 0.8644880  | H | 5.0154340 | -3.1469260 | 1.0606680  |
| H | -4.8330550 | -2.8214430 | 1.4031970  | H | 4.9351960 | -3.0758770 | -1.4195130 |
| H | -4.8285400 | -3.0004700 | -1.0451510 | H | 3.5804260 | -1.3681230 | -2.5763080 |
| C | -3.1679080 | -1.3761440 | 3.0141800  | H | 3.7386340 | -1.5060310 | 2.3954740  |

63

2c M05-2X/6-31+G(d) Optimized Geometry

|   |             |             |             |
|---|-------------|-------------|-------------|
| C | 0.69699033  | -3.75279957 | 0.70003579  |
| C | 0.69699033  | -3.75279957 | -0.70003579 |
| C | -4.90092635 | -0.23417716 | -0.69625446 |
| C | -4.90092635 | -0.23417716 | 0.69625446  |
| C | 0.15212562  | -2.68593114 | -1.40719041 |
| C | 0.15212562  | -2.68593114 | 1.40719041  |
| C | -3.69798598 | -0.30492854 | -1.40379330 |
| C | -3.69798598 | -0.30492854 | 1.40379330  |
| C | -2.50525412 | -0.39193188 | -0.70083422 |
| C | -2.50525412 | -0.39193188 | 0.70083422  |
| C | -0.42681468 | -1.63611969 | -0.69370802 |
| C | -0.42681468 | -1.63611969 | 0.69370802  |
| H | 1.14574704  | -4.59153456 | 1.21381979  |
| H | 1.14574704  | -4.59153456 | -1.21381979 |
| H | -5.83773741 | -0.16796595 | -1.23583223 |
| H | -5.83773741 | -0.16796595 | 1.23583223  |
| O | 0.15464718  | -2.56902371 | -2.76921010 |
| O | 0.15464718  | -2.56902371 | 2.76921010  |
| C | 0.77917067  | -3.60477148 | -3.50557611 |
| H | 0.69086242  | -3.32416146 | -4.55191231 |
| H | 1.83544306  | -3.69089939 | -3.23471560 |
| H | 0.27587872  | -4.56095669 | -3.34013181 |
| C | 0.77917067  | -3.60477148 | 3.50557611  |
| H | 0.69086242  | -3.32416146 | 4.55191231  |
| H | 1.83544306  | -3.69089939 | 3.23471560  |
| H | 0.27587872  | -4.56095669 | 3.34013181  |
| H | -3.69141048 | -0.28101965 | -2.48741068 |
| H | -3.69141048 | -0.28101965 | 2.48741068  |
| C | -1.10907112 | -0.43081068 | -1.30043404 |
| C | -1.10907112 | -0.43081068 | 1.30043404  |
| C | -0.40367342 | 0.86159531  | -0.77129826 |
| C | -0.40367342 | 0.86159531  | 0.77129826  |
| C | -1.27684780 | 2.05361701  | -1.13583751 |
| C | -1.27684780 | 2.05361701  | 1.13583751  |
| O | -1.74067905 | 2.68167557  | 0.00000000  |
| O | -1.55658340 | 2.44015002  | -2.23077910 |
| O | -1.55658340 | 2.44015002  | 2.23077910  |
| H | -1.11647247 | -0.44557777 | -2.38836245 |
| H | -1.11647247 | -0.44557777 | 2.38836245  |
| C | 3.75103677  | -1.50535928 | 0.69614808  |
| C | 3.75103677  | -1.50535928 | -0.69614808 |
| C | 1.99999792  | 0.13875688  | -0.70024466 |

|   |            |             |             |
|---|------------|-------------|-------------|
| C | 1.99999792 | 0.13875688  | 0.70024466  |
| C | 2.87012305 | -0.68171269 | -1.40198382 |
| C | 2.87012305 | -0.68171269 | 1.40198382  |
| C | 1.04070677 | 1.14405464  | -1.30025625 |
| C | 1.04070677 | 1.14405464  | 1.30025625  |
| C | 1.42263334 | 2.48863786  | -0.70115273 |
| C | 1.42263334 | 2.48863786  | 0.70115273  |
| C | 1.99650905 | 4.82045351  | -0.69615377 |
| C | 1.99650905 | 4.82045351  | 0.69615377  |
| C | 1.70034597 | 3.65222874  | -1.40335444 |
| C | 1.70034597 | 3.65222874  | 1.40335444  |
| H | 4.43947039 | -2.14494784 | 1.23568068  |
| H | 4.43947039 | -2.14494784 | -1.23568068 |
| H | 2.86286688 | -0.68172082 | -2.48657926 |
| H | 2.86286688 | -0.68172082 | 2.48657926  |
| H | 1.04986276 | 1.15169219  | -2.39049166 |
| H | 1.04986276 | 1.15169219  | 2.39049166  |
| H | 2.21640153 | 5.73333773  | -1.23584898 |
| H | 2.21640153 | 5.73333773  | 1.23584898  |
| H | 1.67465186 | 3.65462726  | 2.48703348  |
| H | 1.67465186 | 3.65462726  | -2.48703348 |

63

3c M05-2X/6-31+G(d) Optimized Geometry

|   |             |             |             |
|---|-------------|-------------|-------------|
| C | 4.38017246  | -0.05296720 | 0.69616338  |
| C | 4.38017246  | -0.05296720 | -0.69616338 |
| C | -0.68738390 | -4.27366644 | -0.69955100 |
| C | -0.68738390 | -4.27366644 | 0.69955100  |
| C | 3.18916656  | -0.24183170 | -1.40114132 |
| C | 3.18916656  | -0.24183170 | 1.40114132  |
| C | -0.23866133 | -3.16302885 | -1.41197895 |
| C | -0.23866133 | -3.16302885 | 1.41197895  |
| C | 0.21099320  | -2.05271162 | -0.69547116 |
| C | 0.21099320  | -2.05271162 | 0.69547116  |
| C | 2.00813159  | -0.43083254 | -0.69985197 |
| C | 2.00813159  | -0.43083254 | 0.69985197  |
| H | 5.30804509  | 0.09183118  | 1.23619911  |
| H | 5.30804509  | 0.09183118  | -1.23619911 |
| H | -1.04602153 | -5.15410926 | -1.21438694 |
| H | -1.04602153 | -5.15410926 | 1.21438694  |
| O | -0.20362888 | -3.06905127 | -2.77066822 |
| O | -0.20362888 | -3.06905127 | 2.77066822  |
| C | -0.83679580 | -4.09874342 | -3.51064895 |
| H | -0.32060668 | -5.05292565 | -3.37487248 |
| H | -1.88507233 | -4.19477808 | -3.21691410 |

|   |             |             |             |
|---|-------------|-------------|-------------|
| H | -0.77502433 | -3.79757620 | -4.55289246 |
| C | -0.83679580 | -4.09874342 | 3.51064895  |
| H | -0.32060668 | -5.05292565 | 3.37487248  |
| H | -1.88507233 | -4.19477808 | 3.21691410  |
| H | -0.77502433 | -3.79757620 | 4.55289246  |
| H | 3.18575310  | -0.24586804 | -2.48562449 |
| H | 3.18575310  | -0.24586804 | 2.48562449  |
| C | 0.65199406  | -0.72947659 | -1.30060489 |
| C | 0.65199406  | -0.72947659 | 1.30060489  |
| C | -0.39344160 | 0.30727376  | -0.77179702 |
| C | -0.39344160 | 0.30727376  | 0.77179702  |
| C | -1.78021670 | -0.20720908 | -1.13629742 |
| C | -1.78021670 | -0.20720908 | 1.13629742  |
| O | -2.51150389 | -0.48124949 | 0.00000000  |
| O | -2.23165668 | -0.36781707 | -2.23029452 |
| O | -2.23165668 | -0.36781707 | 2.23029452  |
| H | 0.65091270  | -0.75534769 | -2.38878443 |
| H | 0.65091270  | -0.75534769 | 2.38878443  |
| C | 3.01220266  | 3.66680856  | 0.69609119  |
| C | 3.01220266  | 3.66680856  | -0.69609119 |
| C | 0.95726795  | 2.42249984  | -0.69996878 |
| C | 0.95726795  | 2.42249984  | 0.69996878  |
| C | 1.98096500  | 3.04152822  | -1.40065531 |
| C | 1.98096500  | 3.04152822  | 1.40065531  |
| C | -0.27128573 | 1.77343437  | -1.29997192 |
| C | -0.27128573 | 1.77343437  | 1.29997192  |
| C | -1.46124337 | 2.50745778  | -0.70111867 |
| C | -1.46124337 | 2.50745778  | 0.70111867  |
| C | -3.54933989 | 3.69350590  | -0.69612765 |
| C | -3.54933989 | 3.69350590  | 0.69612765  |
| C | -2.50583531 | 3.09037729  | -1.40324958 |
| C | -2.50583531 | 3.09037729  | 1.40324958  |
| H | 3.81466479  | 4.15446335  | 1.23626380  |
| H | 3.81466479  | 4.15446335  | -1.23626380 |
| H | 1.97833094  | 3.04008326  | -2.48524864 |
| H | 1.97833094  | 3.04008326  | 2.48524864  |
| H | -0.27862414 | 1.78577796  | -2.39046885 |
| H | -0.27862414 | 1.78577796  | 2.39046885  |
| H | -4.36779365 | 4.15377345  | -1.23583314 |
| H | -4.36779365 | 4.15377345  | 1.23583314  |
| H | -2.51483666 | 3.06646566  | 2.48695956  |
| H | -2.51483666 | 3.06646566  | -2.48695956 |

39

1c M05-2X/6-31+G(d) Optimized Geometry

|   |             |             |             |
|---|-------------|-------------|-------------|
| C | -0.59874465 | 3.20795911  | 0.69919481  |
| C | -0.59874465 | 3.20795911  | -0.69919481 |
| C | 3.86027845  | -1.53740973 | -0.69490211 |
| C | 3.86027845  | -1.53740973 | 0.69490211  |
| C | -0.35329952 | 2.03428897  | -1.41178922 |
| C | -0.35329952 | 2.03428897  | 1.41178922  |
| C | 2.69634723  | -1.21497199 | -1.40404900 |
| C | 2.69634723  | -1.21497199 | 1.40404900  |
| C | 1.54718694  | -0.89944686 | -0.70099840 |
| C | 1.54718694  | -0.89944686 | 0.70099840  |
| C | -0.11541555 | 0.86353113  | -0.69429463 |
| C | -0.11541555 | 0.86353113  | 0.69429463  |
| H | -0.79432203 | 4.13823781  | 1.21387453  |
| H | -0.79432203 | 4.13823781  | -1.21387453 |
| H | 4.76408309  | -1.78983194 | -1.23544709 |
| H | 4.76408309  | -1.78983194 | 1.23544709  |
| H | 2.69415607  | -1.21270188 | -2.48780142 |
| H | 2.69415607  | -1.21270188 | 2.48780142  |
| C | 0.19593310  | -0.50440793 | -1.31289923 |
| C | 0.19593310  | -0.50440793 | 1.31289923  |
| C | -0.79130159 | -1.43834372 | -0.66649226 |
| C | -0.79130159 | -1.43834372 | 0.66649226  |
| C | -1.80515455 | -2.40828028 | -1.13794590 |
| C | -1.80515455 | -2.40828028 | 1.13794590  |
| O | -2.38813060 | -2.96284094 | 0.00000000  |
| O | -2.13098618 | -2.72300416 | -2.24124535 |
| O | -2.13098618 | -2.72300416 | 2.24124535  |
| H | 0.18306886  | -0.50083414 | -2.39818941 |
| H | 0.18306886  | -0.50083414 | 2.39818941  |
| O | -0.32605535 | 1.93589515  | -2.77195933 |
| O | -0.32605535 | 1.93589515  | 2.77195933  |
| C | -0.58439890 | 3.11438571  | -3.51633657 |
| C | -0.58439890 | 3.11438571  | 3.51633657  |
| H | -1.58352542 | 3.50001320  | -3.29906065 |
| H | -1.58352542 | 3.50001320  | 3.29906065  |
| H | 0.16496784  | 3.88096595  | -3.30375565 |
| H | 0.16496784  | 3.88096595  | 3.30375565  |
| H | -0.52468102 | 2.82507107  | -4.56173746 |
| H | -0.52468102 | 2.82507107  | 4.56173746  |

63

TS2c M05-2X/6-31+G(d) Optimized Geometry

|   |             |             |             |
|---|-------------|-------------|-------------|
| C | 1.03217335  | -3.70336562 | 0.70035644  |
| C | 1.03217335  | -3.70336562 | -0.70035644 |
| C | -4.80237437 | -1.24473954 | -0.69429565 |

|   |             |             |             |
|---|-------------|-------------|-------------|
| C | -4.80237437 | -1.24473954 | 0.69429565  |
| C | 0.44349368  | -2.66042194 | -1.40660278 |
| C | 0.44349368  | -2.66042194 | 1.40660278  |
| C | -3.61284223 | -1.02710855 | -1.40457259 |
| C | -3.61284223 | -1.02710855 | 1.40457259  |
| C | -2.44133718 | -0.81273638 | -0.70281823 |
| C | -2.44133718 | -0.81273638 | 0.70281823  |
| C | -0.18269404 | -1.63545761 | -0.69412699 |
| C | -0.18269404 | -1.63545761 | 0.69412699  |
| H | 1.50861946  | -4.52624605 | 1.21500027  |
| H | 1.50861946  | -4.52624605 | -1.21500027 |
| H | -5.72711922 | -1.40458557 | -1.23510740 |
| H | -5.72711922 | -1.40458557 | 1.23510740  |
| O | 0.41957222  | -2.55554725 | -2.76944372 |
| O | 0.41957222  | -2.55554725 | 2.76944372  |
| C | 1.06522094  | -3.57595317 | -3.50831810 |
| H | 0.94876526  | -3.30801442 | -4.55514781 |
| H | 2.12888588  | -3.62437362 | -3.25689059 |
| H | 0.59870289  | -4.54743546 | -3.32515902 |
| C | 1.06522094  | -3.57595317 | 3.50831810  |
| H | 0.94876526  | -3.30801442 | 4.55514781  |
| H | 2.12888588  | -3.62437362 | 3.25689059  |
| H | 0.59870289  | -4.54743546 | 3.32515902  |
| H | -3.61142659 | -1.01751145 | -2.48840986 |
| H | -3.61142659 | -1.01751145 | 2.48840986  |
| C | -1.04996002 | -0.55012051 | -1.30812960 |
| C | -1.04996002 | -0.55012051 | 1.30812960  |
| C | -0.67653438 | 0.79073195  | -0.69282417 |
| C | -0.67653438 | 0.79073195  | 0.69282417  |
| C | -1.32242718 | 2.04697395  | -1.13195481 |
| C | -1.32242718 | 2.04697395  | 1.13195481  |
| O | -1.58544034 | 2.80970436  | 0.00000000  |
| O | -1.63006724 | 2.41600329  | -2.22879214 |
| O | -1.63006724 | 2.41600329  | 2.22879214  |
| H | -1.04787880 | -0.55458124 | -2.39444020 |
| H | -1.04787880 | -0.55458124 | 2.39444020  |
| C | 3.58694251  | -1.42531072 | 0.70731720  |
| C | 3.58694251  | -1.42531072 | -0.70731720 |
| C | 2.19711758  | 0.54924211  | 0.70883304  |
| C | 2.19711758  | 0.54924211  | -0.70883304 |
| C | 2.88396148  | -0.47324729 | -1.40462393 |
| C | 2.88396148  | -0.47324729 | 1.40462393  |
| C | 1.47515667  | 1.58355289  | -1.36636309 |
| C | 1.47515667  | 1.58355289  | 1.36636309  |
| C | 0.86251590  | 5.21042327  | -0.70726871 |

|   |            |             |             |
|---|------------|-------------|-------------|
| C | 0.86251590 | 5.21042327  | 0.70726871  |
| C | 1.31981770 | 2.83796903  | -0.70933539 |
| C | 1.31981770 | 2.83796903  | 0.70933539  |
| C | 1.06725116 | 4.04514776  | -1.40527643 |
| C | 1.06725116 | 4.04514776  | 1.40527643  |
| H | 4.13631116 | -2.19233592 | 1.24008967  |
| H | 4.13631116 | -2.19233592 | -1.24008967 |
| H | 2.86169256 | -0.48092878 | -2.48860095 |
| H | 2.86169256 | -0.48092878 | 2.48860095  |
| H | 1.38180904 | 1.55229020  | -2.44789170 |
| H | 1.38180904 | 1.55229020  | 2.44789170  |
| H | 0.68204009 | 6.13493501  | -1.24126144 |
| H | 0.68204009 | 6.13493501  | 1.24126144  |
| H | 1.03594873 | 4.03291976  | 2.48823854  |
| H | 1.03594873 | 4.03291976  | -2.48823854 |

63

TS3c M05-2X/6-31+G(d) Optimized Geometry

|   |           |            |            |
|---|-----------|------------|------------|
| C | 0.7987110 | 4.2481810  | 0.2810980  |
| C | 0.8498150 | 4.1202070  | -1.1038500 |
| C | 4.3300550 | -1.1273260 | -0.5669900 |
| C | 4.3119180 | -0.9981810 | 0.8234630  |
| C | 0.8055630 | 2.8553790  | -1.6943950 |
| C | 0.7138290 | 3.1143160  | 1.0937930  |
| C | 3.2373100 | -0.7197300 | -1.3361220 |
| C | 3.2006520 | -0.4585290 | 1.4756840  |
| C | 2.1257130 | -0.1991700 | -0.6802720 |
| C | 2.1085020 | -0.0688160 | 0.7062220  |
| C | 0.7187430 | 1.7320780  | -0.8858790 |
| C | 0.6806900 | 1.8570570  | 0.5099140  |
| H | 0.8362950 | 5.2311800  | 0.7349720  |
| H | 0.9293720 | 5.0032940  | -1.7262860 |
| H | 5.2079420 | -1.5517650 | -1.0334790 |
| H | 5.1765250 | -1.3270350 | 1.3827000  |
| O | 3.1731840 | -0.7903590 | -2.6970830 |
| O | 3.1007700 | -0.2773710 | 2.8241310  |
| C | 4.2452840 | -1.4294980 | -3.3673850 |
| H | 5.1792450 | -0.8789070 | -3.2260690 |
| H | 4.3630670 | -2.4583180 | -3.0176170 |
| H | 3.9794630 | -1.4307280 | -4.4209010 |
| C | 4.1544090 | -0.7778150 | 3.6281500  |
| H | 5.0927310 | -0.2606540 | 3.4102850  |
| H | 4.2787030 | -1.8534330 | 3.4788890  |
| H | 3.8624300 | -0.5837460 | 4.6565520  |
| H | 0.8588450 | 2.7463280  | -2.7719350 |

|   |            |            |            |
|---|------------|------------|------------|
| H | 0.6928440  | 3.2134160  | 2.1732490  |
| C | 0.8345960  | 0.2953070  | -1.3567760 |
| C | 0.7971940  | 0.5291200  | 1.2478510  |
| C | -0.2406850 | -0.5413660 | -0.6753300 |
| C | -0.2373470 | -0.4476890 | 0.7078970  |
| C | -0.4009220 | -1.9740200 | -1.0167870 |
| C | -0.3854020 | -1.8180370 | 1.2431400  |
| O | -0.5909000 | -2.6762210 | 0.1656470  |
| O | -0.3535340 | -2.5230690 | -2.0795050 |
| O | -0.3340420 | -2.2253690 | 2.3681260  |
| H | 0.8601690  | 0.1805280  | -2.4370850 |
| H | 0.7990920  | 0.6232670  | 2.3304680  |
| C | -2.6439780 | 3.6934690  | 0.7966410  |
| C | -2.5834980 | 3.7208660  | -0.6157710 |
| C | -2.5292200 | 1.2829990  | 0.7500800  |
| C | -2.4883720 | 1.3060690  | -0.6661600 |
| C | -2.4823090 | 2.5530180  | -1.3328240 |
| C | -2.5862550 | 2.4985570  | 1.4708160  |
| C | -2.4381750 | 0.0545910  | -1.3451040 |
| C | -2.5008890 | 0.0118900  | 1.3846900  |
| C | -3.9505490 | -3.3161750 | -0.7649340 |
| C | -3.9736750 | -3.3400030 | 0.6487470  |
| C | -3.0197870 | -1.0866980 | -0.7180570 |
| C | -3.0441610 | -1.1110450 | 0.6999290  |
| C | -3.4661880 | -2.2203880 | -1.4383440 |
| C | -3.5108220 | -2.2670570 | 1.3711020  |
| H | -2.7174400 | 4.6240740  | 1.3459430  |
| H | -2.6042430 | 4.6720960  | -1.1327360 |
| H | -2.4205070 | 2.5728420  | -2.4149410 |
| H | -2.6127010 | 2.4691000  | 2.5542930  |
| H | -2.3316360 | 0.0491460  | -2.4259400 |
| H | -2.4212290 | -0.0339530 | 2.4668220  |
| H | -4.3024950 | -4.1769670 | -1.3193640 |
| H | -4.3431020 | -4.2184780 | 1.1624620  |
| H | -3.4962290 | -2.2896190 | 2.4542350  |
| H | -3.4154460 | -2.2119240 | -2.5204510 |

31

1d M05-2X/AVDZ' Optimized Geometry

|   |            |            |            |
|---|------------|------------|------------|
| C | -2.0480800 | 3.7753880  | 0.6956060  |
| C | -2.0480800 | 3.7753880  | -0.6956060 |
| C | 2.9851210  | -0.3547420 | -0.6935100 |
| C | 2.9851210  | -0.3547420 | 0.6935100  |
| C | -1.6576640 | 2.6334100  | -1.4062550 |

|    |            |            |            |
|----|------------|------------|------------|
| C  | -1.6576640 | 2.6334100  | 1.4062550  |
| C  | 1.7825110  | -0.1923120 | -1.3879520 |
| C  | 1.7825110  | -0.1923120 | 1.3879520  |
| C  | 0.5884750  | -0.0381090 | -0.7040580 |
| C  | 0.5884750  | -0.0381090 | 0.7040580  |
| C  | -1.2771440 | 1.5035860  | -0.7005870 |
| C  | -1.2771440 | 1.5035860  | 0.7005870  |
| H  | -2.3539160 | 4.6680530  | 1.2382400  |
| H  | -2.3539160 | 4.6680530  | -1.2382400 |
| H  | 3.9146830  | -0.4803140 | -1.2433700 |
| H  | 3.9146830  | -0.4803140 | 1.2433700  |
| H  | -1.6533760 | 2.6320590  | -2.4953190 |
| H  | -1.6533760 | 2.6320590  | 2.4953190  |
| Br | 1.8287490  | -0.1853220 | -3.2874950 |
| Br | 1.8287490  | -0.1853220 | 3.2874950  |
| C  | -0.8018160 | 0.1800440  | -1.3119920 |
| C  | -0.8018160 | 0.1800440  | 1.3119920  |
| C  | -1.6630530 | -0.8715510 | -0.6668080 |
| C  | -1.6630530 | -0.8715510 | 0.6668080  |
| C  | -2.5650940 | -1.9504300 | -1.1375500 |
| C  | -2.5650940 | -1.9504300 | 1.1375500  |
| O  | -3.0788650 | -2.5685570 | 0.0000000  |
| O  | -2.8564440 | -2.2926160 | -2.2396580 |
| O  | -2.8564440 | -2.2926160 | 2.2396580  |
| H  | -0.8061270 | 0.1699330  | -2.4016940 |
| H  | -0.8061270 | 0.1699330  | 2.4016940  |

55

2d M05-2X/AVDZ' Optimized Geometry

|   |            |            |            |
|---|------------|------------|------------|
| C | -4.0288990 | -0.4123110 | 0.6983310  |
| C | -4.0288990 | -0.4123110 | -0.6983310 |
| C | -1.2288520 | 5.4234640  | -0.6983790 |
| C | -1.2288520 | 5.4234640  | 0.6983790  |
| C | -2.9857930 | 0.2020380  | -1.4055210 |
| C | -2.9857930 | 0.2020380  | 1.4055210  |
| C | -1.0917470 | 4.2217970  | -1.4069180 |
| C | -1.0917470 | 4.2217970  | 1.4069180  |
| C | -0.9663270 | 3.0270460  | -0.7038070 |
| C | -0.9663270 | 3.0270460  | 0.7038070  |
| C | -1.9538360 | 0.8169370  | -0.7031740 |
| C | -1.9538360 | 0.8169370  | 0.7031740  |
| H | -4.8421900 | -0.8866360 | 1.2414930  |
| H | -4.8421900 | -0.8866360 | -1.2414930 |
| H | -1.3303560 | 6.3595990  | -1.2409700 |
| H | -1.3303560 | 6.3595990  | 1.2409700  |

|                                    |            |            |            |   |            |            |            |
|------------------------------------|------------|------------|------------|---|------------|------------|------------|
| H                                  | -2.9887030 | 0.2063890  | -2.4934060 | C | 3.3752880  | 4.3521770  | 0.6983560  |
| H                                  | -2.9887030 | 0.2063890  | 2.4934060  | C | -2.0281280 | 3.3678580  | -1.4044940 |
| H                                  | -1.0780930 | 4.2229760  | -2.4942510 | C | -2.0281280 | 3.3678580  | 1.4044940  |
| H                                  | -1.0780930 | 4.2229760  | 2.4942510  | C | 2.3938310  | 3.6456090  | -1.4069980 |
| C                                  | -0.8174020 | 1.6290660  | -1.3028630 | C | 2.3938310  | 3.6456090  | 1.4069980  |
| C                                  | -0.8174020 | 1.6290660  | 1.3028630  | C | 1.4120670  | 2.9532960  | -0.7038430 |
| C                                  | 0.5682050  | 1.0840060  | -0.7780190 | C | 1.4120670  | 2.9532960  | 0.7038430  |
| C                                  | 0.5682050  | 1.0840060  | 0.7780190  | C | -0.9974790 | 2.7501550  | -0.7028520 |
| C                                  | 1.6523110  | 2.1008300  | -1.1447430 | C | -0.9974790 | 2.7501550  | 0.7028520  |
| C                                  | 1.6523110  | 2.1008300  | 1.1447430  | H | -3.8682930 | 4.4836670  | 1.2413370  |
| O                                  | 2.2230460  | 2.6366370  | 0.0000000  | H | -3.8682930 | 4.4836670  | -1.2413370 |
| O                                  | 2.0104070  | 2.4353860  | -2.2394780 | H | 4.1428250  | 4.8977710  | -1.2408330 |
| O                                  | 2.0104070  | 2.4353860  | 2.2394780  | H | 4.1428250  | 4.8977710  | 1.2408330  |
| H                                  | -0.8297660 | 1.6403570  | -2.3960290 | H | -2.0238340 | 3.3756240  | -2.4925220 |
| H                                  | -0.8297660 | 1.6403570  | 2.3960290  | H | -2.0238340 | 3.3756240  | 2.4925220  |
| C                                  | -1.2088570 | -3.4230940 | 0.6978540  | H | 2.4019580  | 3.6341050  | -2.4943240 |
| C                                  | -1.2088570 | -3.4230940 | -0.6978540 | H | 2.4019580  | 3.6341050  | 2.4943240  |
| C                                  | 0.1548860  | -1.4117500 | -0.7027150 | C | 0.2611430  | 2.1446620  | -1.3026450 |
| C                                  | 0.1548860  | -1.4117500 | 0.7027150  | C | 0.2611430  | 2.1446620  | 1.3026450  |
| C                                  | -0.5306460 | -2.4114240 | -1.3731840 | C | 0.4592010  | 0.6685580  | -0.7778510 |
| C                                  | -0.5306460 | -2.4114240 | 1.3731840  | C | 0.4592010  | 0.6685580  | 0.7778510  |
| C                                  | 1.0317160  | -0.3301870 | -1.3059170 | C | 1.8763740  | 0.2205810  | -1.1453770 |
| C                                  | 1.0317160  | -0.3301870 | 1.3059170  | C | 1.8763740  | 0.2205810  | 1.1453770  |
| C                                  | 2.4169370  | -0.5686770 | -0.7036870 | O | 2.6217470  | -0.0204730 | 0.0000000  |
| C                                  | 2.4169370  | -0.5686770 | 0.7036870  | O | 2.3444400  | 0.0737990  | -2.2395550 |
| C                                  | 4.7929000  | -0.9711790 | -0.6984390 | O | 2.3444400  | 0.0737990  | 2.2395550  |
| C                                  | 4.7929000  | -0.9711790 | 0.6984390  | H | 0.2663690  | 2.1602930  | -2.3959100 |
| C                                  | 3.6016070  | -0.7643370 | -1.4075180 | H | 0.2663690  | 2.1602930  | 2.3959100  |
| C                                  | 3.6016070  | -0.7643370 | 1.4075180  | C | -4.3355300 | -0.0051460 | 0.6983050  |
| H                                  | -1.7273250 | -4.1919500 | 1.2612910  | C | -4.3355300 | -0.0051460 | -0.6983050 |
| H                                  | -1.7273250 | -4.1919500 | -1.2612910 | C | -1.9321930 | -0.1948010 | -0.7027920 |
| Br                                 | -0.5423090 | -2.4122620 | -3.4357940 | C | -1.9321930 | -0.1948010 | 0.7027920  |
| Br                                 | -0.5423090 | -2.4122620 | 3.4357940  | C | -3.1293770 | -0.0997830 | -1.4052610 |
| H                                  | 1.0402370  | -0.3473430 | -2.3971260 | C | -3.1293770 | -0.0997830 | 1.4052610  |
| H                                  | 1.0402370  | -0.3473430 | 2.3971260  | C | -0.5542420 | -0.4220960 | -1.3054910 |
| H                                  | 5.7215220  | -1.1269060 | -1.2409740 | C | -0.5542420 | -0.4220960 | 1.3054910  |
| H                                  | 5.7215220  | -1.1269060 | 1.2409740  | C | -0.0848370 | -1.7442250 | -0.7040330 |
| H                                  | 3.6028110  | -0.7503000 | 2.4946770  | C | -0.0848370 | -1.7442250 | 0.7040330  |
| H                                  | 3.6028110  | -0.7503000 | -2.4946770 | C | 0.6842000  | -4.0479370 | -0.6975510 |
|                                    |            |            |            | C | 0.6842000  | -4.0479370 | 0.6975510  |
|                                    |            |            |            | C | 0.2977330  | -2.8938500 | -1.3774460 |
|                                    |            |            |            | C | 0.2977330  | -2.8938500 | 1.3774460  |
|                                    |            |            |            | H | -5.2746710 | 0.0625730  | 1.2411830  |
|                                    |            |            |            | H | -5.2746710 | 0.0625730  | -1.2411830 |
|                                    |            |            |            | H | -3.1299180 | -0.1090750 | -2.4930610 |
| 55                                 |            |            |            |   |            |            |            |
| 3d M05-2X/AVDZ' Optimized Geometry |            |            |            |   |            |            |            |
| C                                  | -3.0647050 | 3.9929510  | 0.6983220  |   |            |            |            |
| C                                  | -3.0647050 | 3.9929510  | -0.6983220 |   |            |            |            |
| C                                  | 3.3752880  | 4.3521770  | -0.6983560 |   |            |            |            |

|    |            |            |            |
|----|------------|------------|------------|
| H  | -3.1299180 | -0.1090750 | 2.4930610  |
| H  | -0.5580340 | -0.4438530 | -2.3968950 |
| H  | -0.5580340 | -0.4438530 | 2.3968950  |
| H  | 0.9763990  | -4.9284570 | -1.2603130 |
| H  | 0.9763990  | -4.9284570 | 1.2603130  |
| Br | 0.2864170  | -2.9076920 | 3.4358920  |
| Br | 0.2864170  | -2.9076920 | -3.4358920 |

55

TS2d M05-2X/AVDZ' Optimized Geometry

|    |            |            |            |
|----|------------|------------|------------|
| C  | 0.9750250  | -3.4666710 | 0.6942770  |
| C  | 0.9750250  | -3.4666710 | -0.6942770 |
| C  | -4.8329520 | -0.9382720 | -0.6950020 |
| C  | -4.8329520 | -0.9382720 | 0.6950020  |
| C  | 0.3840230  | -2.4070370 | -1.3818660 |
| C  | 0.3840230  | -2.4070370 | 1.3818660  |
| C  | -3.6432560 | -0.7261490 | -1.4069040 |
| C  | -3.6432560 | -0.7261490 | 1.4069040  |
| C  | -2.4706010 | -0.5148500 | -0.7024520 |
| C  | -2.4706010 | -0.5148500 | 0.7024520  |
| C  | -0.2252900 | -1.3611360 | -0.7043560 |
| C  | -0.2252900 | -1.3611360 | 0.7043560  |
| H  | 1.4344930  | -4.2833780 | 1.2455860  |
| H  | 1.4344930  | -4.2833780 | -1.2455860 |
| H  | -5.7630460 | -1.0974010 | -1.2375910 |
| H  | -5.7630460 | -1.0974010 | 1.2375910  |
| Br | 0.4315940  | -2.4341160 | -3.2843620 |
| Br | 0.4315940  | -2.4341160 | 3.2843620  |
| H  | -3.6412130 | -0.7192510 | -2.4959250 |
| H  | -3.6412130 | -0.7192510 | 2.4959250  |
| C  | -1.0793410 | -0.2585350 | -1.3070770 |
| C  | -1.0793410 | -0.2585350 | 1.3070770  |
| C  | -0.6847490 | 1.0758650  | -0.6932420 |
| C  | -0.6847490 | 1.0758650  | 0.6932420  |
| C  | -1.3236210 | 2.3385160  | -1.1316070 |
| C  | -1.3236210 | 2.3385160  | 1.1316070  |
| O  | -1.5784920 | 3.1043090  | 0.0000000  |
| O  | -1.6326190 | 2.7067080  | -2.2262510 |
| O  | -1.6326190 | 2.7067080  | 2.2262510  |
| H  | -1.0828270 | -0.2573500 | -2.3977690 |
| H  | -1.0828270 | -0.2573500 | 2.3977690  |
| C  | 3.5652370  | -1.1865200 | 0.7076860  |
| C  | 3.5652370  | -1.1865200 | -0.7076860 |
| C  | 2.1889710  | 0.7999250  | 0.7092060  |
| C  | 2.1889710  | 0.7999250  | -0.7092060 |

|   |           |            |            |
|---|-----------|------------|------------|
| C | 2.8706850 | -0.2263880 | -1.4059890 |
| C | 2.8706850 | -0.2263880 | 1.4059890  |
| C | 1.4791940 | 1.8435380  | -1.3681520 |
| C | 1.4791940 | 1.8435380  | 1.3681520  |
| C | 0.8998560 | 5.4774220  | -0.7075230 |
| C | 0.8998560 | 5.4774220  | 0.7075230  |
| C | 1.3315030 | 3.0989930  | -0.7097710 |
| C | 1.3315030 | 3.0989930  | 0.7097710  |
| C | 1.0922430 | 4.3091400  | -1.4067530 |
| C | 1.0922430 | 4.3091400  | 1.4067530  |
| H | 4.1130890 | -1.9585290 | 1.2457970  |
| H | 4.1130890 | -1.9585290 | -1.2457970 |
| H | 2.8571820 | -0.2313050 | -2.4950760 |
| H | 2.8571820 | -0.2313050 | 2.4950760  |
| H | 1.3938570 | 1.8152860  | -2.4558610 |
| H | 1.3938570 | 1.8152860  | 2.4558610  |
| H | 0.7311800 | 6.4088060  | -1.2445450 |
| H | 0.7311800 | 6.4088060  | 1.2445450  |
| H | 1.0648600 | 4.2992300  | 2.4950100  |
| H | 1.0648600 | 4.2992300  | -2.4950100 |

55

TS3d M05-2X/AVDZ' Optimized Geometry

|    |            |            |            |
|----|------------|------------|------------|
| C  | -0.4771550 | 3.7903390  | -2.0477340 |
| C  | -0.4245370 | 4.2384050  | -0.7295380 |
| C  | -4.0133480 | -0.6710250 | 1.0089320  |
| C  | -4.0362120 | -1.1190500 | -0.3020690 |
| C  | -0.3453630 | 3.3259150  | 0.3266660  |
| C  | -0.4422070 | 2.4221190  | -2.3285260 |
| C  | -2.8729840 | -0.0254530 | 1.5027530  |
| C  | -2.9191150 | -0.9221010 | -1.1232720 |
| C  | -1.7634220 | 0.1617860  | 0.6990760  |
| C  | -1.7864080 | -0.2951930 | -0.6372480 |
| C  | -0.3167020 | 1.9657910  | 0.0494610  |
| C  | -0.3583110 | 1.5183680  | -1.2779410 |
| H  | -0.5550030 | 4.5082280  | -2.8626190 |
| H  | -0.4593620 | 5.3057580  | -0.5173340 |
| H  | -4.8741110 | -0.8184210 | 1.6564730  |
| H  | -4.9148610 | -1.6231910 | -0.6966550 |
| H  | -0.3261770 | 3.6752380  | 1.3583100  |
| H  | -0.5001520 | 2.0636640  | -3.3557180 |
| Br | -2.8954190 | 0.5940020  | 3.2998250  |
| Br | -3.0046830 | -1.5326820 | -2.9218120 |
| C  | -0.4376450 | 0.8477890  | 1.0758450  |
| C  | -0.4848950 | 0.0125050  | -1.3996640 |

|   |            |            |            |
|---|------------|------------|------------|
| C | 0.5802670  | -0.2434760 | 0.7815020  |
| C | 0.5770570  | -0.6607520 | -0.5418400 |
| C | 0.7035120  | -1.4549780 | 1.6244270  |
| C | 0.7094070  | -2.1384330 | -0.5344200 |
| O | 0.8931430  | -2.5456000 | 0.7800790  |
| O | 0.6396260  | -1.5829340 | 2.8112790  |
| O | 0.6423050  | -2.9192210 | -1.4366880 |
| H | -0.4274890 | 1.1978390  | 2.1091260  |
| H | -0.5086580 | -0.3476420 | -2.4292430 |
| C | 2.9807500  | 3.4534220  | -1.5143740 |
| C | 3.0358070  | 3.7685520  | -0.1361510 |
| C | 2.8502110  | 1.0986070  | -0.9778590 |
| C | 2.8881970  | 1.4187110  | 0.4027400  |
| C | 2.9604820  | 2.7727800  | 0.8083510  |
| C | 2.8655810  | 2.1468810  | -1.9284620 |
| C | 2.8437850  | 0.3388010  | 1.3276100  |
| C | 2.7850410  | -0.2800530 | -1.3351450 |
| C | 4.2662600  | -3.1151160 | 1.4297510  |
| C | 4.2434340  | -3.4343630 | 0.0516440  |
| C | 3.3686770  | -0.9261910 | 0.9363570  |
| C | 3.3447990  | -1.2460060 | -0.4462210 |
| C | 3.8194820  | -1.8916220 | 1.8701110  |
| C | 3.7751900  | -2.5271060 | -0.8701140 |
| H | 3.0221560  | 4.2542840  | -2.2503930 |
| H | 3.1245760  | 4.8084260  | 0.1737510  |
| H | 2.9869770  | 3.0084270  | 1.8716900  |
| H | 2.8122700  | 1.9036990  | -2.9890320 |
| H | 2.7702100  | 0.5606280  | 2.3936960  |
| H | 2.6850350  | -0.5451510 | -2.3890530 |
| H | 4.6264400  | -3.8511260 | 2.1458670  |
| H | 4.5862460  | -4.4131480 | -0.2784510 |
| H | 3.7286590  | -2.7811120 | -1.9276880 |
| H | 3.8084380  | -1.6496530 | 2.9315620  |

31

1e M05-2X/6-31+G(d) Optimized Geometry

|   |            |            |            |
|---|------------|------------|------------|
| C | -3.8497800 | -1.3810000 | 0.6950800  |
| C | -3.8497800 | -1.3810000 | -0.6950800 |
| C | 0.6499790  | 3.3232480  | -0.6929030 |
| C | 0.6499790  | 3.3232480  | 0.6929030  |
| C | -2.6824210 | -1.0758820 | -1.4049480 |
| C | -2.6824210 | -1.0758820 | 1.4049480  |
| C | 0.3971590  | 2.1390420  | -1.3902100 |
| C | 0.3971590  | 2.1390420  | 1.3902100  |
| C | 0.1518850  | 0.9638200  | -0.7023100 |

|    |            |            |            |
|----|------------|------------|------------|
| C  | 0.1518850  | 0.9638200  | 0.7023100  |
| C  | -1.5288390 | -0.7793510 | -0.7002240 |
| C  | -1.5288390 | -0.7793510 | 0.7002240  |
| H  | -4.7573570 | -1.6193800 | 1.2350850  |
| H  | -4.7573570 | -1.6193800 | -1.2350850 |
| H  | 0.8447830  | 4.2345850  | -1.2420190 |
| H  | 0.8447830  | 4.2345850  | 1.2420190  |
| H  | -2.6807830 | -1.0724780 | -2.4885400 |
| H  | -2.6807830 | -1.0724780 | 2.4885400  |
| C1 | 0.3926560  | 2.1716650  | -3.1302610 |
| C1 | 0.3926560  | 2.1716650  | 3.1302610  |
| C  | -0.1724770 | -0.4049800 | -1.3120680 |
| C  | -0.1724770 | -0.4049800 | 1.3120680  |
| C  | 0.8085710  | -1.3445100 | -0.6657580 |
| C  | 0.8085710  | -1.3445100 | 0.6657580  |
| C  | 1.8109450  | -2.3283430 | -1.1384740 |
| C  | 1.8109450  | -2.3283430 | 1.1384740  |
| O  | 2.3855130  | -2.8886440 | 0.0000000  |
| O  | 2.1285160  | -2.6458000 | -2.2422780 |
| O  | 2.1285160  | -2.6458000 | 2.2422780  |
| H  | -0.1621090 | -0.4123260 | -2.3975370 |
| H  | -0.1621090 | -0.4123260 | 2.3975370  |

55

2e M05-2X/6-31+G(d) Optimized Geometry

|   |            |            |            |
|---|------------|------------|------------|
| C | -4.0042180 | -0.8480450 | 0.6960580  |
| C | -4.0042180 | -0.8480450 | -0.6960580 |
| C | -1.1350340 | 5.0719400  | -0.6961160 |
| C | -1.1350340 | 5.0719400  | 0.6961160  |
| C | -2.9951130 | -0.1880340 | -1.4024690 |
| C | -2.9951130 | -0.1880340 | 1.4024690  |
| C | -1.0573870 | 3.8696230  | -1.4035550 |
| C | -1.0573870 | 3.8696230  | 1.4035550  |
| C | -0.9966820 | 2.6751400  | -0.7010180 |
| C | -0.9966820 | 2.6751400  | 0.7010180  |
| C | -1.9952480 | 0.4677290  | -0.7003600 |
| C | -1.9952480 | 0.4677290  | 0.7003600  |
| H | -4.7908750 | -1.3601370 | 1.2364840  |
| H | -4.7908750 | -1.3601370 | -1.2364840 |
| H | -1.1852580 | 6.0094240  | -1.2356010 |
| H | -1.1852580 | 6.0094240  | 1.2356010  |
| H | -2.9912430 | -0.1892710 | -2.4867010 |
| H | -2.9912430 | -0.1892710 | 2.4867010  |
| H | -1.0332480 | 3.8672660  | -2.4871150 |
| H | -1.0332480 | 3.8672660  | 2.4871150  |



|                     |                    |            |            |   |            |            |            |
|---------------------|--------------------|------------|------------|---|------------|------------|------------|
| C                   | -0.8703310         | 1.2834100  | -1.3009640 | C | -2.4131660 | -3.1900090 | 1.4035230  |
| C                   | -0.8703310         | 1.2834100  | 1.3009640  | C | -1.4051380 | -2.5463910 | -0.7010280 |
| C                   | 0.4957640          | 0.7381700  | -0.7710020 | C | -1.4051380 | -2.5463910 | 0.7010280  |
| C                   | 0.4957640          | 0.7381700  | 0.7710020  | C | 1.0053990  | -2.3266020 | -0.6998980 |
| C                   | 1.5786250          | 1.7447820  | -1.1358830 | C | 1.0053990  | -2.3266020 | 0.6998980  |
| C                   | 1.5786250          | 1.7447820  | 1.1358830  | H | 3.9547820  | -3.8954870 | 1.2361570  |
| O                   | 2.1484160          | 2.2776470  | 0.0000000  | H | 3.9547820  | -3.8954870 | -1.2361570 |
| O                   | 1.9276790          | 2.0663640  | -2.2312610 | H | -4.2089320 | -4.3606600 | -1.2356610 |
| O                   | 1.9276790          | 2.0663640  | 2.2312610  | H | -4.2089320 | -4.3606600 | 1.2356610  |
| H                   | -0.8780500         | 1.2932860  | -2.3913680 | H | 2.0590000  | -2.8871310 | -2.4853910 |
| H                   | -0.8780500         | 1.2932860  | 2.3913680  | H | 2.0590000  | -2.8871310 | 2.4853910  |
| C                   | -1.3891810         | -3.6590780 | 0.6936170  | H | -2.4234950 | -3.1672630 | -2.4870700 |
| C                   | -1.3891810         | -3.6590780 | -0.6936170 | H | -2.4234950 | -3.1672630 | 2.4870700  |
| C                   | 0.0607420          | -1.7280030 | -0.7015340 | C | -0.2576590 | -1.7476240 | -1.3003530 |
| C                   | 0.0607420          | -1.7280030 | 0.7015340  | C | -0.2576590 | -1.7476240 | 1.3003530  |
| C                   | -0.6708950         | -2.6850490 | -1.3848790 | C | -0.4639740 | -0.2910380 | -0.7710300 |
| C                   | -0.6708950         | -2.6850490 | 1.3848790  | C | -0.4639740 | -0.2910380 | 0.7710300  |
| C                   | 0.9501570          | -0.6598410 | -1.2998550 | C | -1.8783400 | 0.1416510  | -1.1363730 |
| C                   | 0.9501570          | -0.6598410 | 1.2998550  | C | -1.8783400 | 0.1416510  | 1.1363730  |
| C                   | 2.3282120          | -0.8904790 | -0.7003140 | O | -2.6236790 | 0.3739660  | 0.0000000  |
| C                   | 2.3282120          | -0.8904790 | 0.7003140  | O | -2.3330260 | 0.2795480  | -2.2311680 |
| C                   | 4.7062990          | -1.2055850 | -0.6962580 | O | -2.3330260 | 0.2795480  | 2.2311680  |
| C                   | 4.7062990          | -1.2055850 | 0.6962580  | H | -0.2644700 | -1.7597470 | -2.3907780 |
| C                   | 3.5136180          | -1.0400820 | -1.4047030 | H | -0.2644700 | -1.7597470 | 2.3907780  |
| C                   | 3.5136180          | -1.0400820 | 1.4047030  | C | 4.2833030  | 0.3294200  | 0.6961870  |
| H                   | -1.9507730         | -4.4023610 | 1.2436740  | C | 4.2833030  | 0.3294200  | -0.6961870 |
| H                   | -1.9507730         | -4.4023610 | -1.2436740 | C | 1.8961920  | 0.5765650  | -0.6992800 |
| Cl                  | -0.7301350         | -2.6780630 | -3.1270270 | C | 1.8961920  | 0.5765650  | 0.6992800  |
| Cl                  | -0.7301350         | -2.6780630 | 3.1270270  | C | 3.0848460  | 0.4543460  | -1.4021060 |
| H                   | 0.9612800          | -0.6693430 | -2.3878900 | C | 3.0848460  | 0.4543460  | 1.4021060  |
| H                   | 0.9612800          | -0.6693430 | 2.3878900  | C | 0.5241050  | 0.7976460  | -1.2995700 |
| H                   | 5.6376380          | -1.3254110 | -1.2353580 | C | 0.5241050  | 0.7976460  | 1.2995700  |
| H                   | 5.6376380          | -1.3254110 | 1.2353580  | C | 0.0275050  | 2.1060570  | -0.7029780 |
| H                   | 3.5117650          | -1.0174780 | 2.4881400  | C | 0.0275050  | 2.1060570  | 0.7029780  |
| H                   | 3.5117650          | -1.0174780 | -2.4881400 | C | -0.8529680 | 4.3523350  | -0.6934860 |
|                     |                    |            |            | C | -0.8529680 | 4.3523350  | 0.6934860  |
|                     |                    |            |            | C | -0.4126060 | 3.2265500  | -1.3908060 |
|                     |                    |            |            | C | -0.4126060 | 3.2265500  | 1.3908060  |
|                     |                    |            |            | H | 5.2176090  | 0.2354190  | 1.2357590  |
|                     |                    |            |            | H | 5.2176090  | 0.2354190  | -1.2357590 |
|                     |                    |            |            | H | 3.0815340  | 0.4580500  | -2.4863630 |
|                     |                    |            |            | H | 3.0815340  | 0.4580500  | 2.4863630  |
|                     |                    |            |            | H | 0.5262250  | 0.8137440  | -2.3879140 |
|                     |                    |            |            | H | 0.5262250  | 0.8137440  | 2.3879140  |
|                     |                    |            |            | H | -1.1919630 | 5.2208420  | -1.2421180 |
| 55                  |                    |            |            |   |            |            |            |
| 3e M05-2X/6-31+G(d) | Optimized Geometry |            |            |   |            |            |            |
| C                   | 3.1269250          | -3.4529370 | 0.6960650  |   |            |            |            |
| C                   | 3.1269250          | -3.4529370 | -0.6960650 |   |            |            |            |
| C                   | -3.4191650         | -3.8531230 | -0.6961040 |   |            |            |            |
| C                   | -3.4191650         | -3.8531230 | 0.6961040  |   |            |            |            |
| C                   | 2.0620140          | -2.8872780 | -1.4009340 |   |            |            |            |
| C                   | 2.0620140          | -2.8872780 | 1.4009340  |   |            |            |            |
| C                   | -2.4131660         | -3.1900090 | -1.4035230 |   |            |            |            |

|    |            |           |            |
|----|------------|-----------|------------|
| H  | -1.1919630 | 5.2208420 | 1.2421180  |
| Cl | -0.4138230 | 3.2630930 | 3.1294010  |
| Cl | -0.4138230 | 3.2630930 | -3.1294010 |

55

TS2e M05-2X/6-31+G(d) Optimized Geometry

|    |            |            |            |
|----|------------|------------|------------|
| C  | 1.3727430  | -3.6775710 | 0.6936020  |
| C  | 1.3727430  | -3.6775710 | -0.6936020 |
| C  | -4.6357020 | -1.6947150 | -0.6944900 |
| C  | -4.6357020 | -1.6947150 | 0.6944900  |
| C  | 0.6909920  | -2.6778870 | -1.3843910 |
| C  | 0.6909920  | -2.6778870 | 1.3843910  |
| C  | -3.4705880 | -1.3754030 | -1.4054920 |
| C  | -3.4705880 | -1.3754030 | 1.4054920  |
| C  | -2.3229540 | -1.0592010 | -0.7021380 |
| C  | -2.3229540 | -1.0592010 | 0.7021380  |
| C  | -0.0088780 | -1.6952830 | -0.7024190 |
| C  | -0.0088780 | -1.6952830 | 0.7024190  |
| H  | 1.9017400  | -4.4441020 | 1.2443190  |
| H  | 1.9017400  | -4.4441020 | -1.2443190 |
| H  | -5.5426770 | -1.9356330 | -1.2346590 |
| H  | -5.5426770 | -1.9356330 | 1.2346590  |
| Cl | 0.7313690  | -2.6897240 | -3.1269980 |
| Cl | 0.7313690  | -2.6897240 | 3.1269980  |
| H  | -3.4696870 | -1.3672670 | -2.4891460 |
| H  | -3.4696870 | -1.3672670 | 2.4891460  |
| C  | -0.9603050 | -0.6768170 | -1.3072550 |
| C  | -0.9603050 | -0.6768170 | 1.3072550  |
| C  | -0.6908510 | 0.6874100  | -0.6923140 |
| C  | -0.6908510 | 0.6874100  | 0.6923140  |
| C  | -1.4375190 | 1.8867640  | -1.1322420 |
| C  | -1.4375190 | 1.8867640  | 1.1322420  |
| O  | -1.7610990 | 2.6248430  | 0.0000000  |
| O  | -1.7737920 | 2.2272410  | -2.2293200 |
| O  | -1.7737920 | 2.2272410  | 2.2293200  |
| H  | -0.9643700 | -0.6741170 | -2.3937080 |
| H  | -0.9643700 | -0.6741170 | 2.3937080  |
| C  | 3.7355880  | -1.1873940 | 0.7071920  |
| C  | 3.7355880  | -1.1873940 | -0.7071920 |
| C  | 2.1936730  | 0.6711930  | 0.7088310  |
| C  | 2.1936730  | 0.6711930  | -0.7088310 |
| C  | 2.9607170  | -0.2920750 | -1.4047440 |
| C  | 2.9607170  | -0.2920750 | 1.4047440  |
| C  | 1.3935680  | 1.6462650  | -1.3666690 |
| C  | 1.3935680  | 1.6462650  | 1.3666690  |

|   |           |            |            |
|---|-----------|------------|------------|
| C | 0.4797750 | 5.2079530  | -0.7071480 |
| C | 0.4797750 | 5.2079530  | 0.7071480  |
| C | 1.1348970 | 2.8829510  | -0.7093410 |
| C | 1.1348970 | 2.8829510  | 0.7093410  |
| C | 0.7824430 | 4.0641970  | -1.4056360 |
| C | 0.7824430 | 4.0641970  | 1.4056360  |
| H | 4.3429350 | -1.9072970 | 1.2420610  |
| H | 4.3429350 | -1.9072970 | -1.2420610 |
| H | 2.9461280 | -0.2988600 | -2.4885730 |
| H | 2.9461280 | -0.2988600 | 2.4885730  |
| H | 1.3051990 | 1.6088540  | -2.4485400 |
| H | 1.3051990 | 1.6088540  | 2.4485400  |
| H | 0.2227710 | 6.1140460  | -1.2409840 |
| H | 0.2227710 | 6.1140460  | 1.2409840  |
| H | 0.7538260 | 4.0500720  | 2.4885000  |
| H | 0.7538260 | 4.0500720  | -2.4885000 |

55

TS3e M05-2X/6-31+G(d) Optimized Geometry

|    |            |            |            |
|----|------------|------------|------------|
| C  | -1.4031330 | 3.9416140  | -1.1005300 |
| C  | -1.3602200 | 4.0780230  | 0.2841850  |
| C  | -4.2448630 | -1.5097250 | 0.8478970  |
| C  | -4.2554970 | -1.6435530 | -0.5297790 |
| C  | -1.1297340 | 2.9663900  | 1.0984820  |
| C  | -1.2056040 | 2.6916950  | -1.6904830 |
| C  | -3.1791130 | -0.8566190 | 1.4774440  |
| C  | -3.2009570 | -1.1246820 | -1.2896310 |
| C  | -2.1316770 | -0.3520260 | 0.7312150  |
| C  | -2.1420900 | -0.4886120 | -0.6708530 |
| C  | -0.9409510 | 1.7228480  | 0.5143400  |
| C  | -0.9719910 | 1.5911250  | -0.8797550 |
| H  | -1.5977100 | 4.8063090  | -1.7232000 |
| H  | -1.5193490 | 5.0492750  | 0.7365480  |
| H  | -5.0536460 | -1.9084350 | 1.4455900  |
| H  | -5.0724540 | -2.1490570 | -1.0271150 |
| H  | -1.1161200 | 3.0695240  | 2.1775960  |
| H  | -1.2531140 | 2.5748140  | -2.7673860 |
| Cl | -3.2038780 | -0.6894250 | 3.2101750  |
| Cl | -3.2521150 | -1.2959310 | -3.0214180 |
| C  | -0.8892950 | 0.3921540  | 1.2544690  |
| C  | -0.9153080 | 0.1498170  | -1.3474850 |
| C  | 0.2440640  | -0.4624710 | 0.7096290  |
| C  | 0.2491480  | -0.5585830 | -0.6712360 |
| C  | 0.5533350  | -1.8052170 | 1.2472360  |
| C  | 0.5730540  | -1.9635060 | -1.0125960 |

|                     |                    |             |             |   |             |             |             |
|---------------------|--------------------|-------------|-------------|---|-------------|-------------|-------------|
| O                   | 0.8517280          | -2.6350480  | 0.1698440   | C | -1.98722697 | 0.57561946  | 0.70038234  |
| O                   | 0.5512320          | -2.2099980  | 2.3736070   | H | -5.00934448 | -0.84778714 | 1.23636376  |
| O                   | 0.5777120          | -2.5143630  | -2.0747600  | H | -5.00934448 | -0.84778714 | -1.23636376 |
| H                   | -0.8862040         | 0.4932820   | 2.3365130   | H | -0.40223491 | 5.94824809  | -1.23577955 |
| H                   | -0.9257300         | 0.0355690   | -2.4282090  | H | -0.40223491 | 5.94824809  | 1.23577955  |
| C                   | 2.0617000          | 3.9484670   | -0.6322160  | H | -3.06292601 | 0.05905755  | -2.48676635 |
| C                   | 2.1296490          | 3.9313600   | 0.7803470   | H | -3.06292601 | 0.05905755  | 2.48676635  |
| C                   | 2.2656970          | 1.5404850   | -0.6789470  | H | -0.55537488 | 3.80617137  | -2.48720260 |
| C                   | 2.3133110          | 1.5252710   | 0.7375200   | H | -0.55537488 | 3.80617137  | 2.48720260  |
| C                   | 2.2231430          | 2.7401310   | 1.4565860   | C | -0.75915394 | 1.22527070  | -1.30077402 |
| C                   | 2.1044070          | 2.7763020   | -1.3476370  | C | -0.75915394 | 1.22527070  | 1.30077402  |
| C                   | 2.4432640          | 0.2623740   | 1.3746240   | C | 0.51838981  | 0.49388273  | -0.77202556 |
| C                   | 2.3674740          | 0.2924450   | -1.3566800  | C | 0.51838981  | 0.49388273  | 0.77202556  |
| C                   | 4.2779270          | -2.9041370  | 0.6387090   | C | 1.72905459  | 1.34340371  | -1.13576096 |
| C                   | 4.2464570          | -2.8865890  | -0.7753160  | C | 1.72905459  | 1.34340371  | 1.13576096  |
| C                   | 3.1057870          | -0.7931380  | 0.6891000   | O | 2.36569240  | 1.79357881  | 0.00000000  |
| C                   | 3.0732420          | -0.7750430  | -0.7291560  | O | 2.11897666  | 1.61420992  | -2.23118974 |
| C                   | 3.7018390          | -1.8879080  | 1.3611060   | O | 2.11897666  | 1.61420992  | 2.23118974  |
| C                   | 3.6408900          | -1.8536580  | -1.4493310  | H | -0.76532789 | 1.23723541  | -2.39104437 |
| H                   | 1.9646940          | 4.8943260   | -1.1503780  | H | -0.76532789 | 1.23723541  | 2.39104437  |
| H                   | 2.0906180          | 4.8650330   | 1.3277890   | C | -1.96076147 | -3.59329800 | 0.69568073  |
| H                   | 2.2586890          | 2.7164520   | 2.5399290   | C | -1.96076147 | -3.59329800 | -0.69568073 |
| H                   | 2.0396820          | 2.7868970   | -2.4297130  | C | -0.24571379 | -1.88547828 | -0.69929880 |
| H                   | 2.3756020          | 0.2101840   | 2.4573530   | C | -0.24571379 | -1.88547828 | 0.69929880  |
| H                   | 2.2601780          | 0.2728110   | -2.4373260  | C | -1.10744109 | -2.73003287 | -1.36776446 |
| H                   | 4.7456180          | -3.7345400  | 1.1521550   | C | -1.10744109 | -2.73003287 | 1.36776446  |
| H                   | 4.6903380          | -3.7040670  | -1.3291150  | C | 0.77750044  | -0.95372170 | -1.30484729 |
| H                   | 3.5866520          | -1.8532300  | -2.5312720  | C | 0.77750044  | -0.95372170 | 1.30484729  |
| H                   | 3.6950280          | -1.9090450  | 2.4443030   | C | 2.11231801  | -1.36489424 | -0.70106257 |
|                     |                    |             |             | C | 2.11231801  | -1.36489424 | 0.70106257  |
|                     |                    |             |             | C | 4.43161557  | -1.98178371 | -0.69612892 |
|                     |                    |             |             | C | 4.43161557  | -1.98178371 | 0.69612892  |
|                     |                    |             |             | C | 3.26959031  | -1.66477022 | -1.40417524 |
|                     |                    |             |             | C | 3.26959031  | -1.66477022 | 1.40417524  |
|                     |                    |             |             | H | -2.61691307 | -4.24208336 | 1.26022596  |
|                     |                    |             |             | H | -2.61691307 | -4.24208336 | -1.26022596 |
|                     |                    |             |             | F | -1.13085609 | -2.70803894 | -2.72213127 |
|                     |                    |             |             | F | -1.13085609 | -2.70803894 | 2.72213127  |
|                     |                    |             |             | H | 0.78314970  | -0.96851760 | -2.39339800 |
|                     |                    |             |             | H | 0.78314970  | -0.96851760 | 2.39339800  |
|                     |                    |             |             | H | 5.34002734  | -2.21918501 | -1.23568270 |
|                     |                    |             |             | H | 5.34002734  | -2.21918501 | 1.23568270  |
|                     |                    |             |             | H | 3.27156433  | -1.64133877 | 2.48769507  |
|                     |                    |             |             | H | 3.27156433  | -1.64133877 | -2.48769507 |
| 55                  |                    |             |             |   |             |             |             |
| 2f M05-2X/6-31+G(d) | Optimized Geometry |             |             |   |             |             |             |
| C                   | -4.15921429        | -0.44939937 | 0.69604728  |   |             |             |             |
| C                   | -4.15921429        | -0.44939937 | -0.69604728 |   |             |             |             |
| C                   | -0.48564766        | 5.01307632  | -0.69610626 |   |             |             |             |
| C                   | -0.48564766        | 5.01307632  | 0.69610626  |   |             |             |             |
| C                   | -3.06752047        | 0.06283130  | -1.40230512 |   |             |             |             |
| C                   | -3.06752047        | 0.06283130  | 1.40230512  |   |             |             |             |
| C                   | -0.57934085        | 3.81182559  | -1.40355671 |   |             |             |             |
| C                   | -0.57934085        | 3.81182559  | 1.40355671  |   |             |             |             |
| C                   | -0.68903479        | 2.62094056  | -0.70104218 |   |             |             |             |
| C                   | -0.68903479        | 2.62094056  | 0.70104218  |   |             |             |             |
| C                   | -1.98722697        | 0.57561946  | -0.70038234 |   |             |             |             |

|    |                  |                    |             |  |    |                  |                    |             |
|----|------------------|--------------------|-------------|--|----|------------------|--------------------|-------------|
| 55 |                  |                    |             |  |    |                  |                    |             |
| 3f | M05-2X/6-31+G(d) | Optimized Geometry |             |  |    |                  |                    |             |
| C  | 3.21813169       | -3.13889846        | 0.69605644  |  | C  | -0.58243459      | 3.40648652         | -1.37259873 |
| C  | 3.21813169       | -3.13889846        | -0.69605644 |  | C  | -0.58243459      | 3.40648652         | 1.37259873  |
| C  | -3.31491406      | -3.74929585        | -0.69606614 |  | H  | 5.17965018       | 0.63474728         | 1.23599610  |
| C  | -3.31491406      | -3.74929585        | 0.69606614  |  | H  | 5.17965018       | 0.63474728         | -1.23599610 |
| C  | 2.13570867       | -2.60746516        | -1.40092839 |  | H  | 3.03712398       | 0.77953023         | -2.48602251 |
| C  | 2.13570867       | -2.60746516        | 1.40092839  |  | H  | 3.03712398       | 0.77953023         | 2.48602251  |
| C  | -2.32908655      | -3.05642477        | -1.40357786 |  | H  | 0.46782807       | 1.05011589         | -2.39302293 |
| C  | -2.32908655      | -3.05642477        | 1.40357786  |  | H  | 0.46782807       | 1.05011589         | 2.39302293  |
| C  | -1.34083734      | -2.38303484        | -0.70112457 |  | H  | -1.46988243      | 5.34978844         | -1.25911293 |
| C  | -1.34083734      | -2.38303484        | 0.70112457  |  | H  | -1.46988243      | 5.34978844         | 1.25911293  |
| C  | 1.06116221       | -2.08208796        | -0.69997145 |  | F  | -0.58219946      | 3.41070907         | 2.72275682  |
| C  | 1.06116221       | -2.08208796        | 0.69997145  |  | F  | -0.58219946      | 3.41070907         | -2.72275682 |
| H  | 4.05998616       | -3.55453512        | 1.23622004  |  |    |                  |                    |             |
| H  | 4.05998616       | -3.55453512        | -1.23622004 |  | 31 |                  |                    |             |
| H  | -4.08933532      | -4.28014369        | -1.23576095 |  | 1f | M05-2X/6-31+G(d) | Optimized Geometry |             |
| H  | -4.08933532      | -4.28014369        | 1.23576095  |  | C  | -3.96683752      | -0.36968180        | 0.69491725  |
| H  | 2.13268010       | -2.60774383        | -2.48545848 |  | C  | -3.96683752      | -0.36968180        | -0.69491725 |
| H  | 2.13268010       | -2.60774383        | 2.48545848  |  | C  | 1.40782875       | 3.33282181         | -0.69465214 |
| H  | -2.34065879      | -3.03352033        | -2.48718993 |  | C  | 1.40782875       | 3.33282181         | 0.69465214  |
| H  | -2.34065879      | -3.03352033        | 2.48718993  |  | C  | -2.76183674      | -0.30205938        | -1.40456493 |
| C  | -0.22059065      | -1.54628937        | -1.30043126 |  | C  | -2.76183674      | -0.30205938        | 1.40456493  |
| C  | -0.22059065      | -1.54628937        | 1.30043126  |  | C  | 0.91268368       | 2.22305911         | -1.37181489 |
| C  | -0.47756548      | -0.09695373        | -0.77202867 |  | C  | 0.91268368       | 2.22305911         | 1.37181489  |
| C  | -0.47756548      | -0.09695373        | 0.77202867  |  | C  | 0.42714930       | 1.12236752         | -0.70026222 |
| C  | -1.90680332      | 0.28463279         | -1.13621846 |  | C  | 0.42714930       | 1.12236752         | 0.70026222  |
| C  | -1.90680332      | 0.28463279         | 1.13621846  |  | C  | -1.57212583      | -0.23931311        | -0.70088612 |
| O  | -2.66020139      | 0.48785056         | 0.00000000  |  | C  | -1.57212583      | -0.23931311        | 0.70088612  |
| O  | -2.36519267      | 0.41037317         | -2.23102303 |  | H  | -4.90354009      | -0.42408803        | 1.23535667  |
| O  | -2.36519267      | 0.41037317         | 2.23102303  |  | H  | -4.90354009      | -0.42408803        | -1.23535667 |
| H  | -0.22696206      | -1.55896243        | -2.39078161 |  | H  | 1.78537843       | 4.17465040         | -1.25922251 |
| H  | -0.22696206      | -1.55896243        | 2.39078161  |  | H  | 1.78537843       | 4.17465040         | 1.25922251  |
| C  | 4.24268155       | 0.69599784         | 0.69608056  |  | H  | -2.76015388      | -0.30054223        | -2.48826767 |
| C  | 4.24268155       | 0.69599784         | -0.69608056 |  | H  | -2.76015388      | -0.30054223        | 2.48826767  |
| C  | 1.84739252       | 0.85865211         | -0.69994769 |  | F  | 0.90827746       | 2.22747568         | -2.72310745 |
| C  | 1.84739252       | 0.85865211         | 0.69994769  |  | F  | 0.90827746       | 2.22747568         | 2.72310745  |
| C  | 3.04010655       | 0.77724558         | -1.40167006 |  | C  | -0.16817900      | -0.14578968        | -1.31644310 |
| C  | 3.04010655       | 0.77724558         | 1.40167006  |  | C  | -0.16817900      | -0.14578968        | 1.31644310  |
| C  | 0.46898145       | 1.02906633         | -1.30435901 |  | C  | 0.60006781       | -1.26574464        | -0.66615976 |
| C  | 0.46898145       | 1.02906633         | 1.30435901  |  | C  | 0.60006781       | -1.26574464        | 0.66615976  |
| C  | -0.07889424      | 2.31053792         | -0.70096975 |  | C  | 1.37933226       | -2.43420676        | -1.13803117 |
| C  | -0.07889424      | 2.31053792         | 0.70096975  |  | C  | 1.37933226       | -2.43420676        | 1.13803117  |
| C  | -1.08529751      | 4.51056233         | -0.69535117 |  | O  | 1.82693252       | -3.10041377        | 0.00000000  |
| C  | -1.08529751      | 4.51056233         | 0.69535117  |  | O  | 1.62555322       | -2.80960327        | -2.24197574 |
|    |                  |                    |             |  | O  | 1.62555322       | -2.80960327        | 2.24197574  |
|    |                  |                    |             |  | H  | -0.15739591      | -0.15076534        | -2.40255558 |

H -0.15739591 -0.15076534 2.40255558

55

TS2f M05-2X/6-31+G(d) Optimized Geometry

|   |             |             |             |
|---|-------------|-------------|-------------|
| C | -1.72592905 | 3.72739237  | 0.69577442  |
| C | -1.72592905 | 3.72739237  | -0.69577442 |
| C | 4.42764800  | 2.21958256  | -0.69430110 |
| C | 4.42764800  | 2.21958256  | 0.69430110  |
| C | -0.96499744 | 2.78198225  | -1.36724402 |
| C | -0.96499744 | 2.78198225  | 1.36724402  |
| C | 3.28949134  | 1.81314240  | -1.40498933 |
| C | 3.28949134  | 1.81314240  | 1.40498933  |
| C | 2.16832769  | 1.41192432  | -0.70280678 |
| C | 2.16832769  | 1.41192432  | 0.70280678  |
| C | -0.18866509 | 1.85601051  | -0.70003939 |
| C | -0.18866509 | 1.85601051  | 0.70003939  |
| H | -2.30857779 | 4.44249619  | 1.26107781  |
| H | -2.30857779 | 4.44249619  | -1.26107781 |
| H | 5.31396657  | 2.52757740  | -1.23499852 |
| H | 5.31396657  | 2.52757740  | 1.23499852  |
| F | -0.97804434 | 2.77383643  | -2.72206044 |
| F | -0.97804434 | 2.77383643  | 2.72206044  |
| H | 3.29026797  | 1.80407140  | -2.48873309 |
| H | 3.29026797  | 1.80407140  | 2.48873309  |
| C | 0.83975532  | 0.92393089  | -1.31169330 |
| C | 0.83975532  | 0.92393089  | 1.31169330  |
| C | 0.68244749  | -0.45731558 | -0.69268085 |
| C | 0.68244749  | -0.45731558 | 0.69268085  |
| C | 1.52391016  | -1.59223843 | -1.13182840 |
| C | 1.52391016  | -1.59223843 | 1.13182840  |
| O | 1.90502873  | -2.30253762 | 0.00000000  |
| O | 1.88847920  | -1.90270898 | -2.22888349 |
| O | 1.88847920  | -1.90270898 | 2.22888349  |
| H | 0.84039764  | 0.92540963  | -2.39872361 |
| H | 0.84039764  | 0.92540963  | 2.39872361  |
| C | -3.88648304 | 1.04508273  | 0.70732765  |
| C | -3.88648304 | 1.04508273  | -0.70732765 |
| C | -2.19429209 | -0.67780330 | 0.70889365  |
| C | -2.19429209 | -0.67780330 | -0.70889365 |
| C | -3.03700101 | 0.22053988  | -1.40481012 |
| C | -3.03700101 | 0.22053988  | 1.40481012  |
| C | -1.31888870 | -1.58569563 | -1.36686272 |
| C | -1.31888870 | -1.58569563 | 1.36686272  |
| C | -0.12839628 | -5.06487034 | -0.70728007 |
| C | -0.12839628 | -5.06487034 | 0.70728007  |

C -0.96184938 -2.79753524 -0.70942654

C -0.96184938 -2.79753524 0.70942654

C -0.51820386 -3.94802723 -1.40568845

C -0.51820386 -3.94802723 1.40568845

H -4.55308784 1.71120317 1.24137658

H -4.55308784 1.71120317 -1.24137658

H -3.01986813 0.23115527 -2.48889387

H -3.01986813 0.23115527 2.48889387

H -1.23431879 -1.54222330 -2.44876457

H -1.23431879 -1.54222330 2.44876457

H 0.19753106 -5.94867452 -1.24109996

H 0.19753106 -5.94867452 1.24109996

H -0.49103098 -3.93184112 2.48867272

H -0.49103098 -3.93184112 -2.48867272

55

TS3f M05-2X/6-31+G(d) Optimized Geometry

|   |            |            |            |
|---|------------|------------|------------|
| C | -2.1852790 | 3.6138720  | -0.9772620 |
| C | -2.1555290 | 3.7161230  | 0.4105080  |
| C | -4.1578640 | -2.2650140 | 0.8196110  |
| C | -4.1566690 | -2.3592940 | -0.5651410 |
| C | -1.7559120 | 2.6288720  | 1.1917990  |
| C | -1.8055350 | 2.4248120  | -1.6028090 |
| C | -3.1967960 | -1.4748700 | 1.4466190  |
| C | -3.1947490 | -1.6609820 | -1.2917040 |
| C | -2.2403510 | -0.7926300 | 0.7293340  |
| C | -2.2382490 | -0.8891370 | -0.6718580 |
| C | -1.3869520 | 1.4440760  | 0.5729460  |
| C | -1.4056990 | 1.3482890  | -0.8254580 |
| H | -2.5101950 | 4.4567910  | -1.5748600 |
| H | -2.4551490 | 4.6395330  | 0.8909590  |
| H | -4.8852990 | -2.7929840 | 1.4211240  |
| H | -4.8830370 | -2.9641270 | -1.0907870 |
| H | -1.7511080 | 2.7030620  | 2.2733540  |
| H | -1.8398590 | 2.3335810  | -2.6826780 |
| F | -3.2135730 | -1.3754990 | 2.7946420  |
| F | -3.2095200 | -1.7448790 | -2.6408670 |
| C | -1.1291200 | 0.1169000  | -1.2917040 |
| C | -1.1332750 | -0.0539130 | -1.3381100 |
| C | 0.1214720  | -0.5335530 | 0.7037580  |
| C | 0.1326390  | -0.5902930 | -0.6818170 |
| C | 0.6382030  | -1.8267120 | 1.2019970  |
| C | 0.6659550  | -1.9196720 | -1.0610780 |
| O | 1.0527400  | -2.5715460 | 0.1014310  |
| O | 0.7086460  | -2.2567800 | 2.3168100  |

|   |            |            |            |
|---|------------|------------|------------|
| O | 0.7498780  | -2.4344200 | -2.1380250 |
| H | -1.1388250 | 0.1835260  | 2.3632410  |
| H | -1.1366010 | -0.1411300 | -2.4218880 |
| C | 1.2454230  | 4.1404740  | -0.5443450 |
| C | 1.3214820  | 4.1029270  | 0.8670480  |
| C | 1.8006710  | 1.7904820  | -0.6445130 |
| C | 1.8579400  | 1.7518300  | 0.7707920  |
| C | 1.5926770  | 2.9237260  | 1.5166600  |
| C | 1.4559290  | 3.0026120  | -1.2855740 |
| C | 2.1783780  | 0.5076580  | 1.3788500  |
| C | 2.0826360  | 0.5848010  | -1.3494060 |
| C | 4.4836430  | -2.3155960 | 0.5678040  |
| C | 4.4417710  | -2.2720650 | -0.8449500 |
| C | 2.9960110  | -0.4159000 | 0.6687550  |
| C | 2.9530540  | -0.3719900 | -0.7483120 |
| C | 3.7594420  | -1.4181400 | 1.3144260  |
| C | 3.6777650  | -1.3318940 | -1.4941140 |
| H | 1.0085280  | 5.0728440  | -1.0414350 |
| H | 1.1484060  | 5.0085050  | 1.4352900  |
| H | 1.6365270  | 2.8822440  | 2.5991440  |
| H | 1.3851910  | 3.0268840  | -2.3670620 |
| H | 2.1249600  | 0.4216210  | 2.4602020  |
| H | 1.9731340  | 0.5721690  | -2.4299290 |
| H | 5.0783390  | -3.0735330 | 1.0615450  |
| H | 5.0049560  | -2.9975360 | -1.4181700 |
| H | 3.6172380  | -1.3165580 | -2.5755900 |
| H | 3.7618280  | -1.4643100 | 2.3968480  |

**Butadiene + Substrates 1a-1e**

10

butadiene M05-2X/6-31+G(d) Optimized Geometry

|   |             |             |            |
|---|-------------|-------------|------------|
| C | 0.12080402  | -1.84072224 | 0.00000000 |
| H | 1.19457957  | -1.99421140 | 0.00000000 |
| H | -0.50579205 | -2.72333159 | 0.00000000 |
| C | -0.40212927 | -0.61018215 | 0.00000000 |
| H | -1.48092673 | -0.48029605 | 0.00000000 |
| C | 0.40212927  | 0.61018215  | 0.00000000 |
| H | 1.48092673  | 0.48029605  | 0.00000000 |
| C | -0.12080402 | 1.84072224  | 0.00000000 |
| H | -1.19457957 | 1.99421140  | 0.00000000 |
| H | 0.50579205  | 2.72333159  | 0.00000000 |

41

TS4a M05-2X/6-31+G(d) Optimized Geometry

|   |             |             |             |
|---|-------------|-------------|-------------|
| C | -3.91063371 | -0.94173378 | -0.69576289 |
| C | -3.91063371 | -0.94173378 | 0.69576289  |
| C | 2.05886004  | -3.69577291 | 0.69463743  |
| C | 2.05886004  | -3.69577291 | -0.69463743 |
| C | -2.70921211 | -0.82466754 | 1.40191237  |
| C | -2.70921211 | -0.82466754 | -1.40191237 |
| C | 1.36479212  | -2.70681398 | 1.40364216  |
| C | 1.36479212  | -2.70681398 | -1.40364216 |
| C | 0.68250346  | -1.72929889 | 0.70177977  |
| C | 0.68250346  | -1.72929889 | -0.70177977 |
| C | -1.51808771 | -0.70827329 | 0.70127539  |
| C | -1.51808771 | -0.70827329 | -0.70127539 |
| H | -4.84435133 | -1.03523876 | -1.23630316 |
| H | -4.84435133 | -1.03523876 | 1.23630316  |
| H | 2.60347535  | -4.45987052 | 1.23531105  |
| H | 2.60347535  | -4.45987052 | -1.23531105 |
| H | -2.70732796 | -0.82521730 | 2.48626341  |
| H | -2.70732796 | -0.82521730 | -2.48626341 |
| C | -0.12716161 | -0.57608191 | 1.30861706  |
| C | -0.12716161 | -0.57608191 | -1.30861706 |
| C | 0.48304846  | 0.66673340  | 0.68701808  |
| C | 0.48304846  | 0.66673340  | -0.68701808 |
| C | 1.66604780  | 1.42407511  | 1.13727218  |
| C | 1.66604780  | 1.42407511  | -1.13727218 |
| O | 2.23599793  | 1.99620960  | 0.00000000  |
| O | 2.13914182  | 1.56830686  | 2.22652249  |
| O | 2.13914182  | 1.56830686  | -2.22652249 |
| H | -0.12302049 | -0.57225416 | 2.39720581  |

|   |             |             |             |
|---|-------------|-------------|-------------|
| H | -0.12302049 | -0.57225416 | -2.39720581 |
| C | -0.91787379 | 2.44132717  | 1.44360783  |
| C | -0.91787379 | 2.44132717  | -1.44360783 |
| C | -0.40223221 | 3.47589816  | 0.71164412  |
| C | -0.40223221 | 3.47589816  | -0.71164412 |
| H | -0.77245847 | 2.40774533  | 2.51732854  |
| H | -0.77245847 | 2.40774533  | -2.51732854 |
| H | 0.20091652  | 4.22421036  | 1.21426782  |
| H | 0.20091652  | 4.22421036  | -1.21426782 |
| H | 1.36931061  | -2.70185565 | 2.48759125  |
| H | 1.36931061  | -2.70185565 | -2.48759125 |
| H | -1.67632870 | 1.78377914  | 1.03946179  |
| H | -1.67632870 | 1.78377914  | -1.03946179 |

47

TS4b M05-2X/6-31+G(d) Optimized Geometry

|   |             |             |             |
|---|-------------|-------------|-------------|
| C | 2.63010452  | 2.68570403  | -0.69568129 |
| C | 2.63010452  | 2.68570403  | 0.69568129  |
| C | -3.87543705 | 1.85572239  | 0.69465437  |
| C | -3.87543705 | 1.85572239  | -0.69465437 |
| C | -2.76312030 | 1.38341157  | 1.40359976  |
| C | -2.76312030 | 1.38341157  | -1.40359976 |
| C | -1.66667056 | 0.91587943  | 0.70135917  |
| C | -1.66667056 | 0.91587943  | -0.70135917 |
| C | 0.74281050  | 1.23019599  | 0.70044044  |
| C | 0.74281050  | 1.23019599  | -0.70044044 |
| H | 3.37735485  | 3.26354372  | -1.22822844 |
| H | 3.37735485  | 3.26354372  | 1.22822844  |
| H | -4.74193510 | 2.21590128  | 1.23531404  |
| H | -4.74193510 | 2.21590128  | -1.23531404 |
| C | -0.36677430 | 0.37266135  | 1.30565833  |
| C | -0.36677430 | 0.37266135  | -1.30565833 |
| C | -0.21416929 | -1.00376760 | 0.68693398  |
| C | -0.21416929 | -1.00376760 | -0.68693398 |
| C | -0.79884716 | -2.28064004 | 1.13740606  |
| C | -0.79884716 | -2.28064004 | -1.13740606 |
| O | -0.96663069 | -3.07090032 | 0.00000000  |
| O | -1.11880078 | -2.65848854 | 2.22639259  |
| O | -1.11880078 | -2.65848854 | -2.22639259 |
| H | -0.37749866 | 0.36063263  | 2.39294069  |
| H | -0.37749866 | 0.36063263  | -2.39294069 |
| C | 1.91986942  | -1.72865751 | 1.44397789  |
| C | 1.91986942  | -1.72865751 | -1.44397789 |
| C | 2.05705393  | -2.87655993 | 0.71131145  |
| C | 2.05705393  | -2.87655993 | -0.71131145 |

|   |             |             |             |
|---|-------------|-------------|-------------|
| H | 1.77768514  | -1.78507727 | 2.51723106  |
| H | 1.77768514  | -1.78507727 | -2.51723106 |
| H | 1.96148841  | -3.83306171 | 1.21373848  |
| H | 1.96148841  | -3.83306171 | -1.21373848 |
| H | -2.76468705 | 1.37589837  | 2.48768592  |
| H | -2.76468705 | 1.37589837  | -2.48768592 |
| C | 1.68520332  | 1.95794187  | 1.42617283  |
| C | 1.68520332  | 1.95794187  | -1.42617283 |
| C | 1.69344622  | 1.96436061  | 2.93427946  |
| H | 0.76070100  | 2.36947233  | 3.33494961  |
| H | 1.81695535  | 0.95618863  | 3.33902034  |
| H | 2.51366328  | 2.57735984  | 3.30869839  |
| C | 1.69344622  | 1.96436061  | -2.93427946 |
| H | 1.81695535  | 0.95618863  | -3.33902034 |
| H | 0.76070100  | 2.36947233  | -3.33494961 |
| H | 2.51366328  | 2.57735984  | -3.30869839 |
| H | 2.19750650  | -0.76248992 | 1.04216200  |
| H | 2.19750650  | -0.76248992 | -1.04216200 |

47

TS5b M05-2X/6-31+G(d) Optimized Geometry

|   |             |             |             |
|---|-------------|-------------|-------------|
| C | -4.08922783 | 0.30418257  | -0.69575056 |
| C | -4.08922783 | 0.30418257  | 0.69575056  |
| C | 1.03212241  | -3.81696414 | 0.69463783  |
| C | 1.03212241  | -3.81696414 | -0.69463783 |
| C | -2.89582505 | 0.12115219  | 1.40189068  |
| C | -2.89582505 | 0.12115219  | -1.40189068 |
| C | 0.60149785  | -2.70350738 | 1.42816589  |
| C | 0.60149785  | -2.70350738 | -1.42816589 |
| C | 0.17159331  | -1.59905040 | 0.70078539  |
| C | 0.17159331  | -1.59905040 | -0.70078539 |
| C | -1.71336459 | -0.06244245 | 0.70089442  |
| C | -1.71336459 | -0.06244245 | -0.70089442 |
| H | -5.01698082 | 0.44517692  | -1.23631074 |
| H | -5.01698082 | 0.44517692  | 1.23631074  |
| H | 1.38245184  | -4.69409538 | 1.22741474  |
| H | 1.38245184  | -4.69409538 | -1.22741474 |
| H | -2.89372506 | 0.12242132  | 2.48635888  |
| H | -2.89372506 | 0.12242132  | -2.48635888 |
| C | -0.33325799 | -0.27786315 | 1.30581015  |
| C | -0.33325799 | -0.27786315 | -1.30581015 |
| C | 0.56754221  | 0.77258072  | 0.68593451  |
| C | 0.56754221  | 0.77258072  | -0.68593451 |
| C | 1.90309170  | 1.20407295  | 1.13637329  |
| C | 1.90309170  | 1.20407295  | -1.13637329 |

|   |             |             |             |
|---|-------------|-------------|-------------|
| O | 2.60003846  | 1.61576326  | 0.00000000  |
| O | 2.39904212  | 1.21534146  | 2.22539998  |
| O | 2.39904212  | 1.21534146  | -2.22539998 |
| H | -0.33230659 | -0.26564700 | 2.39320891  |
| H | -0.33230659 | -0.26564700 | -2.39320891 |
| C | -0.34362089 | 2.85208972  | 1.44568992  |
| C | -0.34362089 | 2.85208972  | -1.44568992 |
| C | 0.41619291  | 3.72025713  | 0.71236806  |
| C | 0.41619291  | 3.72025713  | -0.71236806 |
| H | -0.21186487 | 2.78496118  | 2.51958574  |
| H | -0.21186487 | 2.78496118  | -2.51958574 |
| H | 1.18814322  | 4.29357654  | 1.21418386  |
| H | 1.18814322  | 4.29357654  | -1.21418386 |
| C | 0.62326662  | -2.70520802 | -2.93632940 |
| H | 1.25177954  | -1.89941839 | -3.32396554 |
| H | 1.01942723  | -3.64983068 | -3.30999361 |
| H | -0.38066051 | -2.57707289 | -3.34995612 |
| C | 0.62326662  | -2.70520802 | 2.93632940  |
| H | 1.01942723  | -3.64983068 | 3.30999361  |
| H | 1.25177954  | -1.89941839 | 3.32396554  |
| H | -0.38066051 | -2.57707289 | 3.34995612  |
| H | -1.23908881 | 2.39906744  | 1.04074565  |
| H | -1.23908881 | 2.39906744  | -1.04074565 |

49

TS4c M05-2X/6-31+G(d) Optimized Geometry

|   |             |             |             |
|---|-------------|-------------|-------------|
| C | 0.43989430  | -3.43677358 | 0.69997129  |
| C | 0.43989430  | -3.43677358 | -0.69997129 |
| C | -4.25114540 | 1.17487565  | -0.69467330 |
| C | -4.25114540 | 1.17487565  | 0.69467330  |
| C | -3.08156516 | 0.87133104  | -1.40395866 |
| C | -3.08156516 | 0.87133104  | 1.40395866  |
| C | -1.92721206 | 0.57525143  | -0.70163914 |
| C | -1.92721206 | 0.57525143  | 0.70163914  |
| C | -0.20005567 | -1.12583056 | -0.69481135 |
| C | -0.20005567 | -1.12583056 | 0.69481135  |
| H | 0.69185503  | -4.35346247 | 1.21445001  |
| H | 0.69185503  | -4.35346247 | -1.21445001 |
| H | -5.15795375 | 1.41661042  | -1.23536787 |
| H | -5.15795375 | 1.41661042  | 1.23536787  |
| C | -0.56447933 | 0.21956044  | -1.30913520 |
| C | -0.56447933 | 0.21956044  | 1.30913520  |
| C | 0.38964598  | 1.22322502  | -0.68699669 |
| C | 0.38964598  | 1.22322502  | 0.68699669  |
| C | 0.70232872  | 2.59224624  | -1.13778916 |



|   |             |             |             |
|---|-------------|-------------|-------------|
| C | 0.70232872  | 2.59224624  | 1.13778916  |
| O | 1.04746225  | 3.32248454  | 0.00000000  |
| O | 0.68077424  | 3.08767160  | -2.22645254 |
| O | 0.68077424  | 3.08767160  | 2.22645254  |
| H | -0.55928865 | 0.21394394  | -2.39546281 |
| H | -0.55928865 | 0.21394394  | 2.39546281  |
| C | 2.52494361  | 0.49718432  | -1.44509506 |
| C | 2.52494361  | 0.49718432  | 1.44509506  |
| C | 3.33048680  | 1.32535987  | -0.71172372 |
| C | 3.33048680  | 1.32535987  | 0.71172372  |
| H | 2.44051261  | 0.62360043  | -2.51820747 |
| H | 2.44051261  | 0.62360043  | 2.51820747  |
| H | 3.83542398  | 2.14362808  | -1.21375069 |
| H | 3.83542398  | 2.14362808  | 1.21375069  |
| H | -3.07771655 | 0.87462152  | -2.48784390 |
| H | -3.07771655 | 0.87462152  | 2.48784390  |
| C | 0.12458117  | -2.28018561 | -1.40993375 |
| C | 0.12458117  | -2.28018561 | 1.40993375  |
| O | 0.11980583  | -2.17504945 | 2.77064934  |
| O | 0.11980583  | -2.17504945 | -2.77064934 |
| C | 0.43819296  | -3.33848158 | 3.51571543  |
| H | 0.37432000  | -3.04934168 | 4.56114929  |
| H | -0.27767792 | -4.13884283 | 3.31155752  |
| H | 1.45202891  | -3.67991661 | 3.29067846  |
| C | 0.43819296  | -3.33848158 | -3.51571543 |
| H | -0.27767792 | -4.13884283 | -3.31155752 |
| H | 0.37432000  | -3.04934168 | -4.56114929 |
| H | 1.45202891  | -3.67991661 | -3.29067846 |
| H | 2.15469839  | -0.43598493 | -1.04093089 |
| H | 2.15469839  | -0.43598493 | 1.04093089  |

49

TS5c M05-2X/6-31+G(d) Optimized Geometry

|   |             |             |             |
|---|-------------|-------------|-------------|
| C | 4.06166269  | -1.07089764 | -0.69576721 |
| C | 4.06166269  | -1.07089764 | 0.69576721  |
| C | -0.51534269 | 3.62061295  | 0.69881586  |
| C | -0.51534269 | 3.62061295  | -0.69881586 |
| C | 2.89679172  | -0.75331559 | 1.40243819  |
| C | 2.89679172  | -0.75331559 | -1.40243819 |
| C | -0.22358971 | 2.45666355  | 1.41188323  |
| C | -0.22358971 | 2.45666355  | -1.41188323 |
| C | 0.05145828  | 1.29440322  | 0.69525839  |
| C | 0.05145828  | 1.29440322  | -0.69525839 |
| C | 1.74259984  | -0.43855491 | 0.70135866  |
| C | 1.74259984  | -0.43855491 | -0.70135866 |

|   |             |             |             |
|---|-------------|-------------|-------------|
| H | 4.96751640  | -1.31498589 | -1.23608091 |
| H | 4.96751640  | -1.31498589 | 1.23608091  |
| H | -0.74836976 | 4.54194880  | 1.21327596  |
| H | -0.74836976 | 4.54194880  | -1.21327596 |
| H | 2.89426904  | -0.75053008 | 2.48626813  |
| H | 2.89426904  | -0.75053008 | -2.48626813 |
| C | 0.39462121  | -0.06850856 | 1.30883127  |
| C | 0.39462121  | -0.06850856 | -1.30883127 |
| C | -0.61583933 | -1.01633072 | 0.68724178  |
| C | -0.61583933 | -1.01633072 | -0.68724178 |
| C | -1.98864188 | -1.31358886 | 1.13827842  |
| C | -1.98864188 | -1.31358886 | -1.13827842 |
| O | -2.72312892 | -1.64795372 | 0.00000000  |
| O | -2.48453580 | -1.28931348 | 2.22665525  |
| O | -2.48453580 | -1.28931348 | -2.22665525 |
| H | 0.38592638  | -0.05850738 | 2.39492939  |
| H | 0.38592638  | -0.05850738 | -2.39492939 |
| C | 0.07259749  | -3.16650030 | 1.44385135  |
| C | 0.07259749  | -3.16650030 | -1.44385135 |
| C | -0.77070941 | -3.95715786 | 0.71145762  |
| C | -0.77070941 | -3.95715786 | -0.71145762 |
| H | -0.05452282 | -3.08192549 | 2.51666531  |
| H | -0.05452282 | -3.08192549 | -2.51666531 |
| H | -1.59777722 | -4.44631137 | 1.21366863  |
| H | -1.59777722 | -4.44631137 | -1.21366863 |
| O | -0.18454465 | 2.36357792  | -2.77233123 |
| O | -0.18454465 | 2.36357792  | 2.77233123  |
| C | -0.54468547 | 3.51541130  | -3.51517855 |
| H | -0.48611858 | 3.22585808  | -4.56039239 |
| H | -1.56469562 | 3.82683164  | -3.27748542 |
| H | 0.14989890  | 4.33702231  | -3.32274161 |
| C | -0.54468547 | 3.51541130  | 3.51517855  |
| H | -1.56469562 | 3.82683164  | 3.27748542  |
| H | -0.48611858 | 3.22585808  | 4.56039239  |
| H | 0.14989890  | 4.33702231  | 3.32274161  |
| H | 1.01406271  | -2.81683731 | -1.04234948 |
| H | 1.01406271  | -2.81683731 | 1.04234948  |

41

TS4d M05-2X/AVDZ' Optimized Geometry

|   |            |            |            |
|---|------------|------------|------------|
| C | -3.1852212 | -0.4417468 | 0.6941511  |
| C | -3.1852212 | -0.4417468 | -0.6941511 |
| C | 1.4014628  | 4.2681437  | -0.6953063 |
| C | 1.4014628  | 4.2681437  | 0.6953063  |

|    |            |            |            |
|----|------------|------------|------------|
| C  | 1.1146906  | 3.0950032  | -1.4061909 |
| C  | 1.1146906  | 3.0950032  | 1.4061909  |
| C  | 0.8369840  | 1.9357055  | -0.7014075 |
| C  | 0.8369840  | 1.9357055  | 0.7014075  |
| C  | -0.8488227 | 0.1976736  | -0.7049276 |
| C  | -0.8488227 | 0.1976736  | 0.7049276  |
| H  | -4.0895688 | -0.6898832 | 1.2445749  |
| H  | -4.0895688 | -0.6898832 | -1.2445749 |
| H  | 1.6301254  | 5.1838090  | -1.2379097 |
| H  | 1.6301254  | 5.1838090  | 1.2379097  |
| C  | 0.4996577  | 0.5691281  | -1.3081542 |
| C  | 0.4996577  | 0.5691281  | 1.3081542  |
| C  | 1.5049797  | -0.3829872 | -0.6873144 |
| C  | 1.5049797  | -0.3829872 | 0.6873144  |
| C  | 2.8786050  | -0.6809054 | -1.1393575 |
| C  | 2.8786050  | -0.6809054 | 1.1393575  |
| O  | 3.6136761  | -1.0135338 | 0.0000000  |
| O  | 3.3723364  | -0.6524082 | -2.2258427 |
| O  | 3.3723364  | -0.6524082 | 2.2258427  |
| H  | 0.5019511  | 0.5680162  | -2.3987298 |
| H  | 0.5019511  | 0.5680162  | 2.3987298  |
| C  | 0.8012805  | -2.5319047 | -1.4460138 |
| C  | 0.8012805  | -2.5319047 | 1.4460138  |
| C  | 1.6484481  | -3.3178268 | -0.7116969 |
| C  | 1.6484481  | -3.3178268 | 0.7116969  |
| H  | 0.9204879  | -2.4540435 | -2.5268593 |
| H  | 0.9204879  | -2.4540435 | 2.5268593  |
| H  | 2.4772045  | -3.8148864 | -1.2168751 |
| H  | 2.4772045  | -3.8148864 | 1.2168751  |
| H  | 1.1164241  | 3.0917463  | -2.4954624 |
| H  | 1.1164241  | 3.0917463  | 2.4954624  |
| C  | -2.0131987 | -0.1257186 | -1.3853867 |
| C  | -2.0131987 | -0.1257186 | 1.3853867  |
| Br | -2.0480086 | -0.1696450 | -3.2864964 |
| Br | -2.0480086 | -0.1696450 | 3.2864964  |
| H  | -0.1424408 | -2.1818429 | -1.0332102 |
| H  | -0.1424408 | -2.1818429 | 1.0332102  |

41  
TS5d M05-2X/AVDZ' Optimized Geometry

|   |            |            |            |
|---|------------|------------|------------|
| C | -4.0783892 | -1.3352690 | -0.6963953 |
| C | -4.0783892 | -1.3352690 | 0.6963953  |
| C | 0.5120648  | 3.3334800  | 0.6931448  |
| C | 0.5120648  | 3.3334800  | -0.6931448 |
| C | -2.9098432 | -1.0344276 | 1.4046984  |

|    |            |            |            |
|----|------------|------------|------------|
| C  | -2.9098432 | -1.0344276 | -1.4046984 |
| C  | 0.2232850  | 2.1534704  | 1.3873163  |
| C  | 0.2232850  | 2.1534704  | -1.3873163 |
| C  | -0.0499724 | 0.9810875  | 0.7050922  |
| C  | -0.0499724 | 0.9810875  | -0.7050922 |
| C  | -1.7500570 | -0.7398533 | 0.7011263  |
| C  | -1.7500570 | -0.7398533 | -0.7011263 |
| H  | -4.9936995 | -1.5656116 | -1.2389253 |
| H  | -4.9936995 | -1.5656116 | 1.2389253  |
| H  | 0.7358272  | 4.2440135  | 1.2437320  |
| H  | 0.7358272  | 4.2440135  | -1.2437320 |
| H  | -2.9084501 | -1.0285174 | 2.4942270  |
| H  | -2.9084501 | -1.0285174 | -2.4942270 |
| C  | -0.3985664 | -0.3854699 | 1.3078998  |
| C  | -0.3985664 | -0.3854699 | -1.3078998 |
| C  | 0.6111831  | -1.3329600 | 0.6873732  |
| C  | 0.6111831  | -1.3329600 | -0.6873732 |
| C  | 1.9844296  | -1.6350906 | 1.1397537  |
| C  | 1.9844296  | -1.6350906 | -1.1397537 |
| O  | 2.7180585  | -1.9708173 | 0.0000000  |
| O  | 2.4783886  | -1.6075064 | 2.2257818  |
| O  | 2.4783886  | -1.6075064 | -2.2257818 |
| H  | -0.3928518 | -0.3829879 | 2.3985739  |
| H  | -0.3928518 | -0.3829879 | -2.3985739 |
| C  | -0.0926434 | -3.4797338 | 1.4444030  |
| C  | -0.0926434 | -3.4797338 | -1.4444030 |
| C  | 0.7519277  | -4.2697441 | 0.7117666  |
| C  | 0.7519277  | -4.2697441 | -0.7117666 |
| H  | 0.0321903  | -3.4027151 | 2.5248853  |
| H  | 0.0321903  | -3.4027151 | -2.5248853 |
| H  | 1.5782121  | -4.7703881 | 1.2172691  |
| H  | 1.5782121  | -4.7703881 | -1.2172691 |
| Br | 0.2136939  | 2.2042447  | 3.2879657  |
| Br | 0.2136939  | 2.2042447  | -3.2879657 |
| H  | -1.0344439 | -3.1231332 | 1.0332532  |
| H  | -1.0344439 | -3.1231332 | -1.0332532 |

41  
TS4e M05-2X/6-31+G(d) Optimized Geometry

|   |            |            |            |
|---|------------|------------|------------|
| C | 0.8327282  | 3.4762568  | -0.6933419 |
| C | 0.8327282  | 3.4762568  | 0.6933419  |
| C | -4.3164701 | -0.6259092 | 0.6948139  |
| C | -4.3164701 | -0.6259092 | -0.6948139 |
| C | -3.1221481 | -0.4493874 | 1.4049657  |

|    |            |            |            |
|----|------------|------------|------------|
| C  | -3.1221481 | -0.4493874 | -1.4049657 |
| C  | -1.9432830 | -0.2804446 | 0.7010256  |
| C  | -1.9432830 | -0.2804446 | -0.7010256 |
| C  | -0.0460016 | 1.2261942  | 0.7029850  |
| C  | -0.0460016 | 1.2261942  | -0.7029850 |
| H  | 1.1715200  | 4.3445634  | -1.2428035 |
| H  | 1.1715200  | 4.3445634  | 1.2428035  |
| H  | -5.2440742 | -0.7686383 | 1.2350215  |
| H  | -5.2440742 | -0.7686383 | -1.2350215 |
| C  | -0.5498698 | -0.0773823 | 1.3082148  |
| C  | -0.5498698 | -0.0773823 | -1.3082148 |
| C  | 0.2971072  | -1.1717757 | 0.6864429  |
| C  | 0.2971072  | -1.1717757 | -0.6864429 |
| C  | 0.4525915  | -2.5677629 | 1.1379599  |
| C  | 0.4525915  | -2.5677629 | -1.1379599 |
| O  | 0.7133931  | -3.3308534 | 0.0000000  |
| O  | 0.3725711  | -3.0548638 | 2.2268110  |
| O  | 0.3725711  | -3.0548638 | -2.2268110 |
| H  | -0.5479650 | -0.0822561 | 2.3947204  |
| H  | -0.5479650 | -0.0822561 | -2.3947204 |
| C  | 2.5054390  | -0.6866992 | 1.4460922  |
| C  | 2.5054390  | -0.6866992 | -1.4460922 |
| C  | 3.2042460  | -1.6057864 | 0.7115887  |
| C  | 3.2042460  | -1.6057864 | -0.7115887 |
| H  | 2.4114960  | -0.7990888 | 2.5199869  |
| H  | 2.4114960  | -0.7990888 | -2.5199869 |
| H  | 3.6092321  | -2.4776547 | 1.2137010  |
| H  | 3.6092321  | -2.4776547 | -1.2137010 |
| H  | -3.1192076 | -0.4526073 | 2.4887593  |
| H  | -3.1192076 | -0.4526073 | -2.4887593 |
| C  | 0.3953878  | 2.3471278  | 1.3880455  |
| C  | 0.3953878  | 2.3471278  | -1.3880455 |
| Cl | 0.4336378  | 2.3650953  | 3.1284791  |
| Cl | 0.4336378  | 2.3650953  | -3.1284791 |
| H  | 2.2543591  | 0.2849338  | 1.0409771  |
| H  | 2.2543591  | 0.2849338  | -1.0409771 |

41

TS5e M05-2X/6-31+G(d) Optimized Geometry

|   |            |            |            |
|---|------------|------------|------------|
| C | 4.0823716  | 0.7295482  | -0.6958963 |
| C | 4.0823716  | 0.7295482  | 0.6958963  |
| C | -0.7510919 | -3.6856579 | 0.6923915  |
| C | -0.7510919 | -3.6856579 | -0.6923915 |
| C | 2.9003929  | 0.4886733  | 1.4033441  |
| C | 2.9003929  | 0.4886733  | -1.4033441 |

|    |            |            |            |
|----|------------|------------|------------|
| C  | -0.3991329 | -2.5259631 | 1.3900577  |
| C  | -0.3991329 | -2.5259631 | -1.3900577 |
| C  | -0.0629132 | -1.3740439 | 0.7033362  |
| C  | -0.0629132 | -1.3740439 | -0.7033362 |
| C  | 1.7284025  | 0.2527181  | 0.7006722  |
| C  | 1.7284025  | 0.2527181  | -0.7006722 |
| H  | 5.0028662  | 0.9128339  | -1.2359663 |
| H  | 5.0028662  | 0.9128339  | 1.2359663  |
| H  | -1.0231424 | -4.5768877 | 1.2421767  |
| H  | -1.0231424 | -4.5768877 | -1.2421767 |
| H  | 2.8984043  | 0.4845232  | 2.4874949  |
| H  | 2.8984043  | 0.4845232  | -2.4874949 |
| C  | 0.3597198  | -0.0292486 | 1.3081396  |
| C  | 0.3597198  | -0.0292486 | -1.3081396 |
| C  | -0.5957426 | 0.9717495  | 0.6864365  |
| C  | -0.5957426 | 0.9717495  | -0.6864365 |
| C  | -1.9497987 | 1.3468919  | 1.1384686  |
| C  | -1.9497987 | 1.3468919  | -1.1384686 |
| O  | -2.6627314 | 1.7228847  | 0.0000000  |
| O  | -2.4428565 | 1.3481012  | 2.2274703  |
| O  | -2.4428565 | 1.3481012  | -2.2274703 |
| H  | 0.3534590  | -0.0285021 | 2.3948036  |
| H  | 0.3534590  | -0.0285021 | -2.3948036 |
| C  | 0.2228099  | 3.0785679  | 1.4442661  |
| C  | 0.2228099  | 3.0785679  | -1.4442661 |
| C  | -0.5762021 | 3.9133493  | 0.7116187  |
| C  | -0.5762021 | 3.9133493  | -0.7116187 |
| H  | 0.0934725  | 3.0037939  | 2.5179579  |
| H  | 0.0934725  | 3.0037939  | -2.5179579 |
| H  | -1.3735617 | 4.4499449  | 1.2142053  |
| H  | -1.3735617 | 4.4499449  | -1.2142053 |
| Cl | -0.3926490 | -2.5627888 | 3.1298084  |
| Cl | -0.3926490 | -2.5627888 | -3.1298084 |
| H  | 1.1419671  | 2.6752303  | 1.0399957  |
| H  | 1.1419671  | 2.6752303  | -1.0399957 |

41

TS4f M05-2X/6-31+G(d) Optimized Geometry

|   |             |            |             |
|---|-------------|------------|-------------|
| C | -1.98812465 | 3.22733943 | 0.69545683  |
| C | -1.98812465 | 3.22733943 | -0.69545683 |
| C | 4.18308941  | 0.96286699 | -0.69465214 |
| C | 4.18308941  | 0.96286699 | 0.69465214  |
| C | 2.99437393  | 0.74975417 | -1.40451799 |
| C | 2.99437393  | 0.74975417 | 1.40451799  |

|   |             |             |             |   |             |             |             |
|---|-------------|-------------|-------------|---|-------------|-------------|-------------|
| C | 1.82252920  | 0.53481058  | -0.70176483 | C | 0.60920569  | -2.71527592 | -1.37188850 |
| C | 1.82252920  | 0.53481058  | 0.70176483  | C | 0.19928770  | -1.58444013 | 0.70115968  |
| C | -0.45226954 | 1.35470063  | -0.70068693 | C | 0.19928770  | -1.58444013 | -0.70115968 |
| C | -0.45226954 | 1.35470063  | 0.70068693  | C | -1.69070251 | -0.07935561 | 0.70128769  |
| H | -2.57198754 | 3.94181494  | 1.26003966  | C | -1.69070251 | -0.07935561 | -0.70128769 |
| H | -2.57198754 | 3.94181494  | -1.26003966 | H | -4.99963692 | 0.38278361  | -1.23617216 |
| H | 5.10768664  | 1.12280249  | -1.23513324 | H | -4.99963692 | 0.38278361  | 1.23617216  |
| H | 5.10768664  | 1.12280249  | 1.23513324  | H | 1.36030663  | -4.71758247 | 1.25913940  |
| C | 0.43673314  | 0.28339743  | -1.31287214 | H | 1.36030663  | -4.71758247 | -1.25913940 |
| C | 0.43673314  | 0.28339743  | 1.31287214  | H | -2.87336933 | 0.08261891  | 2.48698525  |
| C | -0.01189765 | -1.02491320 | -0.68677917 | H | -2.87336933 | 0.08261891  | -2.48698525 |
| C | -0.01189765 | -1.02491320 | 0.68677917  | C | -0.30721833 | -0.27493103 | 1.31254526  |
| C | 0.28825851  | -2.39732521 | -1.13789067 | C | -0.30721833 | -0.27493103 | -1.31254526 |
| C | 0.28825851  | -2.39732521 | 1.13789067  | C | 0.58003942  | 0.78693077  | 0.68699434  |
| O | 0.28743672  | -3.20369459 | 0.00000000  | C | 0.58003942  | 0.78693077  | -0.68699434 |
| O | 0.51914517  | -2.83302394 | -2.22706645 | C | 1.90535259  | 1.25395225  | 1.13836972  |
| O | 0.51914517  | -2.83302394 | 2.22706645  | C | 1.90535259  | 1.25395225  | -1.13836972 |
| H | 0.43278523  | 0.28229131  | -2.39991099 | O | 2.59120388  | 1.67698115  | 0.00000000  |
| H | 0.43278523  | 0.28229131  | 2.39991099  | O | 2.39716459  | 1.28961548  | 2.22732542  |
| C | -2.26041075 | -1.28420731 | -1.44620072 | O | 2.39716459  | 1.28961548  | -2.22732542 |
| C | -2.26041075 | -1.28420731 | 1.44620072  | H | -0.29881838 | -0.27917309 | 2.39966168  |
| C | -2.62464618 | -2.37942396 | -0.71172921 | H | -0.29881838 | -0.27917309 | -2.39966168 |
| C | -2.62464618 | -2.37942396 | 0.71172921  | C | -0.37511685 | 2.83538998  | 1.44378842  |
| H | -2.13561421 | -1.36103539 | -2.52004042 | C | -0.37511685 | 2.83538998  | -1.44378842 |
| H | -2.13561421 | -1.36103539 | 2.52004042  | C | 0.36717262  | 3.72156486  | 0.71147904  |
| H | -2.72683439 | -3.33532821 | -1.21383132 | C | 0.36717262  | 3.72156486  | -0.71147904 |
| H | -2.72683439 | -3.33532821 | 1.21383132  | H | -0.24205671 | 2.77003134  | 2.51764612  |
| H | 2.99311420  | 0.74541452  | -2.48829899 | H | -0.24205671 | 2.77003134  | -2.51764612 |
| H | 2.99311420  | 0.74541452  | 2.48829899  | H | 1.12700628  | 4.30991546  | 1.21428685  |
| C | -1.21864508 | 2.28709354  | -1.37004760 | H | 1.12700628  | 4.30991546  | -1.21428685 |
| C | -1.21864508 | 2.28709354  | 1.37004760  | F | 0.59736478  | -2.72504389 | 2.72334749  |
| F | -1.22876663 | 2.28113282  | -2.72242527 | F | 0.59736478  | -2.72504389 | -2.72334749 |
| F | -1.22876663 | 2.28113282  | 2.72242527  | H | -1.26571972 | 2.37287401  | 1.03910001  |
| H | -2.33408984 | -0.28378856 | -1.04054278 | H | -1.26571972 | 2.37287401  | -1.03910001 |
| H | -2.33408984 | -0.28378856 | 1.04054278  |   |             |             |             |

41

TS5f M05-2X/6-31+G(d) Optimized Geometry

|   |             |             |             |
|---|-------------|-------------|-------------|
| C | -4.06999674 | 0.25486542  | -0.69577452 |
| C | -4.06999674 | 0.25486542  | 0.69577452  |
| C | 1.03500741  | -3.85433521 | 0.69430523  |
| C | 1.03500741  | -3.85433521 | -0.69430523 |
| C | -2.87532747 | 0.08573825  | 1.40282820  |
| C | -2.87532747 | 0.08573825  | -1.40282820 |
| C | 0.60920569  | -2.71527592 | 1.37188850  |

## M06-2X optimized Cartesian Coordinates

### Substituted Benzene Dimers

24

M06-2X/6-31+G(d) Benzene...benzene  
C 0.98616698 0.98616698 -1.87500000  
C -0.36096217 1.34712915 -1.87500000  
C -1.34712915 0.36096217 -1.87500000  
C -0.98616698 -0.98616698 -1.87500000  
C 0.36096217 -1.34712915 -1.87500000  
C 1.34712915 -0.36096217 -1.87500000  
H 1.75424527 1.75424527 -1.87500000  
H -0.64209833 2.39634360 -1.87500000  
H -2.39634360 0.64209833 -1.87500000  
H -1.75424527 -1.75424527 -1.87500000  
H 0.64209833 -2.39634360 -1.87500000  
H 2.39634360 -0.64209833 -1.87500000  
C 0.98616698 0.98616698 1.87500000  
C -0.36096217 1.34712915 1.87500000  
C -1.34712915 0.36096217 1.87500000  
C -0.98616698 -0.98616698 1.87500000  
C 0.36096217 -1.34712915 1.87500000  
C 1.34712915 -0.36096217 1.87500000  
H 1.75424527 1.75424527 1.87500000  
H -0.64209833 2.39634360 1.87500000  
H -2.39634360 0.64209833 1.87500000  
H -1.75424527 -1.75424527 1.87500000  
H 0.64209833 -2.39634360 1.87500000  
H 2.39634360 -0.64209833 1.87500000

27

M06-2X/6-31+G(d) Benzene...toluene  
C -2.02328231 1.26140127 0.00000000  
C -1.33860446 1.41922228 1.20396100  
C 0.01928458 1.73366976 1.20062500  
C 0.71672821 1.89824468 0.00000000  
C 0.01928458 1.73366976 -1.20062500  
C -1.33860446 1.41922228 -1.20396100  
H -1.86127300 1.29405044 2.14823300  
H 0.54786687 1.85181209 2.14425200  
H 0.54786687 1.85181209 -2.14425200  
H -1.86127300 1.29405044 -2.14823300  
H -3.08070872 1.01328212 0.00000000  
C 2.17848389 2.27217061 0.00000000

H 2.30158564 3.36143636 0.00000000  
H 2.68778483 1.88176113 0.88597800  
H 2.68778483 1.88176113 -0.88597800  
C 1.56167329 -1.69506895 0.00000000  
C 0.88358170 -1.85771995 1.20780300  
C -0.47259954 -2.18302147 1.20780300  
C -1.15069113 -2.34567246 0.00000000  
C -0.47259954 -2.18302147 -1.20780300  
C 0.88358170 -1.85771995 -1.20780300  
H 2.61793781 -1.44170720 0.00000000  
H 1.41171493 -1.73103884 2.14850300  
H -1.00073277 -2.30970258 2.14850300  
H -2.20695565 -2.59903422 0.00000000  
H -1.00073277 -2.30970258 -2.14850300  
H 1.41171493 -1.73103884 -2.14850300

25

M06-2X/6-31+G(d) Benzene...phenol  
C -1.99685297 -1.25561850 0.00618317  
C -1.31660291 -1.41952488 -1.19794502  
C 0.03870802 -1.74668832 -1.20714487  
C 0.71716038 -1.91076728 0.00056685  
C 0.04500740 -1.74881753 1.21281175  
C -1.30684042 -1.42248667 1.20848689  
H -1.83884147 -1.29322151 -2.14198115  
H 0.56692887 -1.87396126 -2.15000979  
H 0.59601379 -1.88206067 2.13836950  
H -1.82630381 -1.29732847 2.15423601  
H -3.05182172 -1.00095479 0.00952947  
O 2.04239170 -2.23068711 0.06083741  
H 2.40193057 -2.31725326 -0.83329634  
C -1.12405238 2.33996754 0.00792311  
C -0.44881599 2.17727276 -1.20147318  
C 0.90688979 1.85001250 -1.20466433  
C 1.58736111 1.68544655 0.00153881  
C 0.91212471 1.84814133 1.21093511  
C -0.44358106 2.17540159 1.21412626  
H -2.17994714 2.59485500 0.01040914  
H -0.97880377 2.30544560 -2.14092728  
H 1.43279870 1.72329741 -2.14660546  
H 2.64325586 1.43055909 -0.00094721  
H 1.44211250 1.71996849 2.15038921  
H -0.96948997 2.30211668 2.15606738

28  
M06-2X/6-31+G(d) Benzene...anisole

|   |             |             |             |
|---|-------------|-------------|-------------|
| C | -2.41349322 | -0.34883022 | -0.30581264 |
| C | -1.60730355 | -0.81027680 | -1.33941977 |
| C | -0.42774568 | -1.51214585 | -1.07422721 |
| C | -0.05760092 | -1.75105344 | 0.25067281  |
| C | -0.86492036 | -1.28913613 | 1.29743429  |
| C | -2.03243331 | -0.59416432 | 1.01699654  |
| H | -1.88935980 | -0.62787370 | -2.37241473 |
| H | 0.18274942  | -1.86094702 | -1.89910934 |
| H | -0.55208069 | -1.48955454 | 2.31727831  |
| H | -2.65149618 | -0.24020955 | 1.83625682  |
| H | -3.32725471 | 0.19505000  | -0.52237642 |
| O | 1.06645034  | -2.42170098 | 0.62358196  |
| C | 1.91175931  | -2.90648566 | -0.39716818 |
| H | 1.38782887  | -3.62742459 | -1.03642518 |
| H | 2.29968438  | -2.08621257 | -1.01326214 |
| H | 2.73927813  | -3.40368252 | 0.10830032  |
| C | -0.55011687 | 2.78929134  | -0.25514667 |
| C | 0.25119400  | 2.33090835  | -1.30053511 |
| C | 1.42582216  | 1.63178407  | -1.02390550 |
| C | 1.79913946  | 1.39104279  | 0.29811056  |
| C | 0.99782858  | 1.84942578  | 1.34349900  |
| C | -0.17679957 | 2.54855006  | 1.06686939  |
| H | -1.46497903 | 3.33380605  | -0.47059825 |
| H | -0.03956659 | 2.51841115  | -2.33018984 |
| H | 2.04992459  | 1.27477166  | -1.83810964 |
| H | 2.71400161  | 0.84652808  | 0.51356214  |
| H | 1.28858917  | 1.66192298  | 2.37315373  |
| H | -0.80090201 | 2.90556247  | 1.88107353  |

24  
M06-2X/6-31+G(d) Benzene...fluorobenzene

|   |             |             |             |
|---|-------------|-------------|-------------|
| C | 0.02349647  | -1.75125368 | -1.21686000 |
| C | -1.32577359 | -1.40087952 | -1.20719300 |
| C | -2.00201050 | -1.22527646 | 0.00000000  |
| C | -1.32577359 | -1.40087952 | 1.20719300  |
| C | 0.02349647  | -1.75125368 | 1.21686000  |
| C | 0.66699614  | -1.91835563 | 0.00000000  |
| H | 0.57581138  | -1.89467706 | -2.13939200 |
| H | -1.84837304 | -1.26517255 | -2.14912700 |
| H | -3.05238475 | -0.95251861 | 0.00000000  |
| H | -1.84837304 | -1.26517255 | 2.14912700  |
| H | 0.57581138  | -1.89467706 | 2.13939200  |
| F | 1.97261397  | -2.25739432 | 0.00000000  |

|   |             |            |             |
|---|-------------|------------|-------------|
| C | -1.07651429 | 2.35710794 | 0.00000000  |
| C | -0.40157340 | 2.18184144 | -1.20780300 |
| C | 0.94830644  | 1.83130893 | -1.20780300 |
| C | 1.62324733  | 1.65604242 | 0.00000000  |
| C | 0.94830644  | 1.83130893 | 1.20780300  |
| C | -0.40157340 | 2.18184144 | 1.20780300  |
| H | -2.12787096 | 2.63012090 | 0.00000000  |
| H | -0.92725270 | 2.31834817 | -2.14850300 |
| H | 1.47398574  | 1.69480220 | -2.14850300 |
| H | 2.67460400  | 1.38302946 | 0.00000000  |
| H | 1.47398574  | 1.69480220 | 2.14850300  |
| H | -0.92725270 | 2.31834817 | 2.14850300  |

24  
M06-2X/6-31+G(d) Benzene...chlorobenzene

|    |             |             |             |
|----|-------------|-------------|-------------|
| C  | -0.06048859 | 1.76314706  | 0.00000000  |
| C  | -0.63976502 | 1.40639398  | 1.21281600  |
| C  | -0.63976502 | 1.40639398  | -1.21281600 |
| C  | -2.42085108 | 0.30949465  | 0.00000000  |
| C  | -1.82572184 | 0.67601083  | -1.20516800 |
| C  | -1.82572184 | 0.67601083  | 1.20516800  |
| Cl | 1.42436669  | 2.67760976  | 0.00000000  |
| H  | -3.34269656 | -0.25823294 | 0.00000000  |
| H  | -0.16773986 | 1.69709531  | 2.14214300  |
| H  | -0.16773986 | 1.69709531  | -2.14214300 |
| H  | -2.28255238 | 0.39466726  | -2.14585700 |
| H  | -2.28255238 | 0.39466726  | 2.14585700  |
| C  | 1.86542304  | -1.33742696 | 0.00000000  |
| C  | 1.27203208  | -1.70287260 | -1.20705841 |
| C  | 0.08525018  | -2.43376388 | -1.20705841 |
| C  | -0.50814077 | -2.79920953 | 0.00000000  |
| C  | 0.08525018  | -2.43376388 | 1.20705841  |
| C  | 1.27203208  | -1.70287260 | 1.20705841  |
| H  | 2.78753843  | -0.76953314 | 0.00000000  |
| H  | 1.73308978  | -1.41892569 | -2.14492842 |
| H  | -0.37580752 | -2.71771079 | -2.14492842 |
| H  | -1.43025617 | -3.36710335 | 0.00000000  |
| H  | -0.37580752 | -2.71771079 | 2.14492842  |
| H  | 1.73308978  | -1.41892569 | 2.14492842  |

24  
M06-2X/AVDZ' Benzene...bromobenzene

|   |            |             |             |
|---|------------|-------------|-------------|
| C | 0.66318361 | -1.19488651 | 0.00000000  |
| C | 1.12341543 | -0.69951948 | 1.21544700  |
| C | 1.12341543 | -0.69951948 | -1.21544700 |

|    |             |             |             |   |             |            |             |
|----|-------------|-------------|-------------|---|-------------|------------|-------------|
| C  | 2.54748313  | 0.83326499  | 0.00000000  | H | 1.74522590  | 1.34414754 | 2.14850300  |
| C  | 2.07218313  | 0.32167944  | -1.20607500 | H | -0.37793159 | 2.62748611 | 2.14850300  |
| C  | 2.07218313  | 0.32167944  | 1.20607500  | H | -1.43950949 | 3.26915488 | 0.00000000  |
| Br | -0.63351850 | -2.59058198 | 0.00000000  | H | -0.37793159 | 2.62748611 | -2.14850300 |
| H  | 3.28794119  | 1.63025141  | 0.00000000  | H | 1.74522590  | 1.34414754 | -2.14850300 |
| H  | 0.74560261  | -1.10617544 | 2.14993300  |   |             |            |             |
| H  | 0.74560261  | -1.10617544 | -2.14993300 |   |             |            |             |
| H  | 2.43947312  | 0.71700923  | -2.15106200 |   |             |            |             |
| H  | 2.43947312  | 0.71700923  | 2.15106200  |   |             |            |             |
| C  | -2.02239861 | 1.27704317  | 0.00000000  |   |             |            |             |
| C  | -1.54805797 | 1.78759611  | -1.20705841 |   |             |            |             |
| C  | -0.59937671 | 2.80870199  | -1.20705841 |   |             |            |             |
| C  | -0.12503608 | 3.31925492  | 0.00000000  |   |             |            |             |
| C  | -0.59937671 | 2.80870199  | 1.20705841  |   |             |            |             |
| C  | -1.54805797 | 1.78759611  | 1.20705841  |   |             |            |             |
| H  | -2.75951264 | 0.48365607  | 0.00000000  |   |             |            |             |
| H  | -1.91661499 | 1.39090256  | -2.14492842 |   |             |            |             |
| H  | -0.23081969 | 3.20539554  | -2.14492842 |   |             |            |             |
| H  | 0.61207795  | 4.11264203  | 0.00000000  |   |             |            |             |
| H  | -0.23081969 | 3.20539554  | 2.14492842  |   |             |            |             |
| H  | -1.91661499 | 1.39090256  | 2.14492842  |   |             |            |             |

25

M06-2X/6-31+G(d) Benzene...cyanobenzene

|   |             |             |             |
|---|-------------|-------------|-------------|
| C | -0.01521980 | -1.85672514 | 0.00000000  |
| C | -0.60908272 | -1.49776581 | -1.21559900 |
| C | -0.60908272 | -1.49776581 | 1.21559900  |
| C | -2.39421709 | -0.41874468 | 0.00000000  |
| C | -1.79960534 | -0.77815664 | 1.20950400  |
| C | -1.79960534 | -0.77815664 | -1.20950400 |
| C | 1.21802652  | -2.60215856 | 0.00000000  |
| N | 2.20872118  | -3.20098209 | 0.00000000  |
| H | -0.13557563 | -1.78397628 | -2.14911700 |
| H | -0.13557563 | -1.78397628 | 2.14911700  |
| H | -3.32336883 | 0.14287934  | 0.00000000  |
| H | -2.26349485 | -0.49775950 | 2.14982200  |
| H | -2.26349485 | -0.49775950 | -2.14982200 |
| C | 1.87720191  | 1.26437489  | 0.00000000  |
| C | 1.28042410  | 1.62509612  | 1.20780300  |
| C | 0.08687021  | 2.34653753  | 1.20780300  |
| C | -0.50990760 | 2.70725876  | 0.00000000  |
| C | 0.08687021  | 2.34653753  | -1.20780300 |
| C | 1.28042410  | 1.62509612  | -1.20780300 |
| H | 2.80680380  | 0.70247877  | 0.00000000  |

**Maleic Anhydride + Benzene**

12

Benzene M06-2X/6-31+G(d) Optimized Geometry

|   |             |             |            |
|---|-------------|-------------|------------|
| C | 0.98616659  | 0.98616659  | 0.00000000 |
| C | -0.36096202 | 1.34712862  | 0.00000000 |
| C | -1.34712862 | 0.36096202  | 0.00000000 |
| C | -0.98616659 | -0.98616659 | 0.00000000 |
| C | 0.36096202  | -1.34712862 | 0.00000000 |
| C | 1.34712862  | -0.36096202 | 0.00000000 |
| H | 1.75424475  | 1.75424475  | 0.00000000 |
| H | -0.64209814 | 2.39634289  | 0.00000000 |
| H | -2.39634289 | 0.64209814  | 0.00000000 |
| H | -1.75424475 | -1.75424475 | 0.00000000 |
| H | 0.64209814  | -2.39634289 | 0.00000000 |
| H | 2.39634289  | -0.64209814 | 0.00000000 |

9

maleic anhydride M06-2X/6-31+G(d) Optimized Geometry

|   |             |            |             |
|---|-------------|------------|-------------|
| C | -0.66552383 | 0.00000000 | -1.25944978 |
| C | 0.66552383  | 0.00000000 | -1.25944978 |
| C | -1.12437511 | 0.00000000 | 0.16298082  |
| H | -1.36369792 | 0.00000000 | -2.08599078 |
| H | 1.36369792  | 0.00000000 | -2.08599078 |
| O | 0.00000000  | 0.00000000 | 0.96639906  |
| O | -2.23203096 | 0.00000000 | 0.60242764  |
| C | 1.12437511  | 0.00000000 | 0.16298082  |
| O | 2.23203096  | 0.00000000 | 0.60242764  |

21

Cycloadduct M06-2X/6-31+G(d) Optimized Geometry

|   |             |             |             |
|---|-------------|-------------|-------------|
| C | -0.57301622 | 2.37041812  | 0.66687106  |
| H | -1.00601598 | 3.14959539  | -1.28571540 |
| H | -1.00601598 | 3.14959539  | 1.28571540  |
| C | -0.57301622 | 2.37041812  | -0.66687106 |
| C | 1.44065214  | 0.93451385  | 0.66713208  |
| H | 2.31494854  | 0.76094789  | 1.28594246  |
| C | 0.06763189  | 1.13887550  | 1.28429128  |
| H | 2.31494854  | 0.76094789  | -1.28594246 |
| C | -0.80694891 | -0.06070733 | -0.76489251 |
| C | -0.80694891 | -0.06070733 | 0.76489251  |
| C | 1.44065214  | 0.93451385  | -0.66713208 |
| C | 0.06763189  | 1.13887550  | -1.28429128 |
| C | -0.18915061 | -1.39491427 | -1.13908629 |
| H | 0.08358251  | 1.14892465  | -2.37451175 |

|   |             |             |             |
|---|-------------|-------------|-------------|
| H | 0.08358251  | 1.14892465  | 2.37451175  |
| H | -1.80711921 | -0.00216101 | 1.20176239  |
| C | -0.18915061 | -1.39491427 | 1.13908629  |
| H | -1.80711921 | -0.00216101 | -1.20176239 |
| O | 0.03428491  | -1.82707667 | -2.22832759 |
| O | 0.12584941  | -2.10563220 | 0.00000000  |
| O | 0.03428491  | -1.82707667 | 2.22832759  |

21

transition state M06-2X/6-31+G(d) Optimized Geometry

|   |             |             |             |
|---|-------------|-------------|-------------|
| C | 0.57772639  | 2.36072644  | 0.67867452  |
| H | 1.22164100  | 3.01030283  | -1.26331744 |
| H | 1.22164100  | 3.01030283  | 1.26331744  |
| C | 0.57772639  | 2.36072644  | -0.67867452 |
| C | -1.41348357 | 0.91981975  | 0.67960467  |
| H | -2.22370787 | 0.49224847  | 1.26170069  |
| C | -0.19557265 | 1.33091117  | 1.32745304  |
| H | -2.22370787 | 0.49224847  | -1.26170069 |
| C | 1.01975682  | -0.24657378 | -0.70551386 |
| C | 1.01975682  | -0.24657378 | 0.70551386  |
| C | -1.41348357 | 0.91981975  | -0.67960467 |
| C | -0.19557265 | 1.33091117  | -1.32745304 |
| C | 0.18783886  | -1.40395117 | -1.13102763 |
| H | -0.14236190 | 1.24601504  | -2.40997211 |
| H | -0.14236190 | 1.24601504  | 2.40997211  |
| H | 1.86340200  | 0.02681446  | 1.32529493  |
| C | 0.18783886  | -1.40395117 | 1.13102763  |
| H | 1.86340200  | 0.02681446  | -1.32529493 |
| O | -0.04037017 | -1.82321332 | -2.22716086 |
| O | -0.37041735 | -1.97567055 | 0.00000000  |
| O | -0.04037017 | -1.82321332 | 2.22716086  |



## References

---

- (1) Sheldrick, G. M. *Acta Cryst. Sect. A* **1990**, *46*, 467.
- (2) Sheldrick, G. M. *Acta Cryst. Sect. A* **2008**, *64*, 112.
- (3) Müller, P. *Crystallography Reviews* 2009, *15*, 57.
- (4) Sheldrick, G. M. (**2003**). CELL\_NOW, University of Göttingen, Germany.
- (5) Bruker (**2005**). SAINT, Bruker-AXS Inc., Madison, Wisconsin, USA.
- (6) Sheldrick, G. M. (**2007**). TWINABS, University of Göttingen, Germany.
- (7) Kim, Y.; Zhu, Z.; Swager, T. M. *J. Am. Chem. Soc.* **2004**, *126*, 452.
- (8) Mel was used as the alkylating agent. See: Kraus, G. A.; On Man, T. *Synth. Commun.* **1986**, *16*, 1037.
- (9) Lee, S. K.; Yang, W. J.; Choi, J. J.; Kim, C. H.; Jeon, S.-J.; Cho, B. R. *Org. Lett.* **2005**, *7*, 323.
